# Supplementary material for: High-Throughput miRNA and mRNA Sequencing of Paired Colorectal Normal, Tumor and Metastasis Tissues and Bioinformatic Modeling of miRNA-1 Therapeutic Applications
Source: PLoS One. 2013 Jul 2;8(7):e67461. doi: 10.1371/journal.pone.0067461 (PMC3707605; doi:10.1371/journal.pone.0067461)
Supplement: Table S6 — Complete lists of miRNAs detected in (A) N/T, (B) N/M and (C) T/M. (XLS) [file pone.0067461.s009.xls]

## Sheet: Table S6A
	Table S6A Complete lists of miRNAs detected in N/T Analysis of 8 colorectal cancer patients using NGS technology delivered a range of malign tissue specific deregulated miRNAs.
	ID	P1	P2	P3	P4	P5	P6	P7	P8	median log2ratio	p-values
	hsa-mir-129-1	-5.29921	NA	-4.08746	-4.88982	-5.30735	-2.87643	-6.20887	0.287802	-4.88982	0.00269847
	hsa-mir-137	-1.73697	NA	NA	-4.57787	-4.38982	-5.04439	-1.88694	-4.34341	-4.36661	0.00163741
	hsa-mir-1265	NA	NA	NA	NA	-3.84925	NA	NA	NA	-3.84925	NA
	hsa-mir-1-1	-3.34079	-3.36663	-3.96347	-3.74916	-7.32449	-1.00511	-3.88694	-3.84472	-3.79694	0.00041546
	hsa-mir-129-2	-4.31628	-1.60109	-5.07325	-2.96382	-4.98476	-3.32604	-3.58182	-0.61891	-3.45393	0.000567186
	hsa-mir-1-2	-2.73934	-4.03301	-1.4991	-3.92153	-6.61716	-0.525643	-2.43065	-4.34388	-3.33043	0.00178716
	hsa-mir-1224	-4.24249	-2.94213	-0.36257	-3.63637	-6.17989	-1.96347	-1.76458	-5.24919	-3.28925	0.00189356
	hsa-mir-202	-0.906891	NA	NA	-2.79028	-3.19717	-1.58496	-3.37237	-4.78921	-2.99373	0.00436326
	hsa-mir-147b	0.335791	-3.80842	-4.98185	-1.53041	-5.46782	-4.72973	-2.05883	-0.218912	-2.93362	0.00950263
	hsa-mir-194-1	0.213566	1.47306	-4.20056	-2.61806	-6.7869	-1.41425	-3.37237	-3.19001	-2.90404	0.0298057
	hsa-mir-215	-3.16146	2.37693	-5.35723	-1.77336	-5.9308	-1.2802	-3.80217	-2.57278	-2.86712	0.0224864
	hsa-mir-551b	-0.141356	-2.86413	NA	-1.06782	-1.72424	-3	-3.50361	-2.89636	-2.86413	0.00336588
	hsa-mir-548a-3	NA	NA	NA	NA	NA	-1.58496	-3.14998	NA	-2.36747	0.203222
	hsa-mir-3154	-1.90689	-2.27917	NA	-0.471965	-0.389816	-3.58496	-2.56501	-2.51096	-2.27917	0.00427852
	hsa-mir-378c	1.1375	-2.27917	-3.03562	-2.0984	0.592482	-3.55582	-2.29084	0.225067	-2.18879	0.0606983
	hsa-mir-875	NA	NA	NA	NA	NA	NA	-2.14998	NA	-2.14998	NA
	hsa-mir-218-2	NA	NA	NA	-3.42033	NA	0.736966	-2.14998	NA	-2.14998	0.320477
	hsa-mir-139	-2	-2.04916	-1.32193	-2.4911	-0.915699	-0.358687	-2.02634	-3.20565	-2.01317	0.000788876
	hsa-mir-190	1.36257	-4.08652	-0.485427	-1.80735	-2.21085	-4.01792	-2.25307	0.666576	-2.0091	0.0577102
	hsa-mir-195	1.57299	-2.79724	-2.71945	-1.82104	-0.648042	-2.08629	-2.52913	-1.92636	-2.00632	0.0164259
	hsa-mir-375	-4.78894	-2.16463	-1.88523	-1.99766	-5.08592	-0.665411	0.517871	2.75901	-1.94145	0.112847
	hsa-mir-150	-2.18075	-3.79224	-3.75489	-1.54443	0.815761	1.73697	-3.27041	1.22475	-1.86259	0.141857
	hsa-mir-592	NA	-0.279166	-2.11548	5.15458	-1.84925	-3.43296	2.78291	-2.48543	-1.84925	0.798458
	hsa-mir-30c-2	-3.72186	-1.63871	-2.18442	-1.77648	2.05841	-0.0524674	-1.76593	-2.12635	-1.7712	0.0543883
	hsa-mir-3065	-1.94084	-2.20517	-0.432959	-1.58706	-2.09496	-1.06904	-0.998153	-2.9872	-1.76395	0.000669141
	hsa-mir-138-1	-1.64386	-1.86413	1.22239	-2.58119	-3.01076	-1.54057	-2.73494	0.107948	-1.75399	0.0230901
	hsa-mir-133b	NA	NA	NA	-2.71989	NA	-0.777608	NA	NA	-1.74875	0.322722
	hsa-mir-561	NA	NA	3.39232	-1.71989	-1.71174	-1.36257	-2.88694	-2.57289	-1.71582	0.27685
	hsa-mir-422a	-1.6845	NA	-1.16993	-1.50839	-4.07164	-2.27886	-2.38604	0.244484	-1.6845	0.0102015
	hsa-mir-363	-3.96578	-0.607789	1.2384	-4.10087	-1.84996	1.35957	-1.75832	-1.57319	-1.66575	0.0934277
	hsa-mir-3150	-0.321928	-1.76459	-3.32193	-1.52725	-2.09764	-1.848	-0.497899	0.251539	-1.64592	0.0110517
	hsa-mir-3152	NA	-1.27917	-2	-0.982926	NA	NA	-2.37237	NA	-1.63958	0.0139071
	hsa-mir-99a	-2.60314	-2.49408	-1.89655	-2.43248	2.74648	1.58347	-1.34922	-1.121	-1.62288	0.226397
	hsa-mir-3164	NA	NA	NA	NA	NA	-1.58496	NA	NA	-1.58496	NA
	hsa-mir-3197	NA	NA	NA	NA	NA	-1.58496	NA	NA	-1.58496	NA
	hsa-mir-617	NA	NA	NA	NA	NA	-1.58496	NA	NA	-1.58496	NA
	hsa-mir-147	NA	NA	NA	-0.719892	NA	-1.58496	-3.14998	NA	-1.58496	0.124935
	hsa-mir-30a	-1.4278	-1.4742	-2.60287	-1.70491	-0.298048	0.178449	-1.68912	-1.8485	-1.58166	0.00345698
	hsa-mir-631	NA	NA	NA	NA	NA	NA	-1.56501	NA	-1.56501	NA
	hsa-mir-885	NA	NA	NA	-2.62678	7.29167	NA	-1.56501	NA	-1.56501	0.773649
	hsa-mir-497	-2.13175	-1.58959	-4.34508	-1.24184	-0.877141	-1.5145	-2.45595	-1.4718	-1.55204	0.00140442
	hsa-mir-585	NA	-1.27917	NA	-2.47478	-2.12678	-1.58496	-0.680491	-1.48543	-1.53519	0.00158139
	hsa-mir-3194	-0.906891	NA	NA	-2.71989	3.51707	NA	-2.14998	NA	-1.52843	0.715939
	hsa-mir-378	-2.10512	-1.10229	-2.66297	-0.206941	-1.00839	-2.8514	-1.92381	-0.717157	-1.51305	0.00230727
	hsa-mir-378b	0.0599425	NA	-2.90689	-1.1016	-2.81279	-2.78746	-1.48751	0.123621	-1.48751	0.0208917
	hsa-mir-2114	NA	NA	1	-2.52725	0.458181	-4.39232	-1.30198	-1.65535	-1.47867	0.14238
	hsa-mir-196b	2.75097	-0.92571	-3.07635	-1.26504	-6.90923	-2.69535	-0.324569	-1.66623	-1.46563	0.111224
	hsa-mir-135a-2	-1.32193	NA	NA	-3.57787	-3.38982	NA	2.43499	-1.42403	-1.42403	0.249586
	hsa-mir-145	-1.38933	-2.00016	-2.94946	-1.27238	-3.18994	-0.119033	-1.45006	-1.0908	-1.4197	0.0021279
	hsa-mir-1262	0.146221	-2.06766	-1.35364	-1.44236	-2.11471	-0.247928	-2.96442	0.922658	-1.398	0.0431391
	hsa-mir-100	-1.48676	-1.51557	-1.14858	-2.13476	1.83512	3.21099	-1.30238	-1.61888	-1.39457	0.471976
	hsa-mir-451	-3.57442	-1.65759	1.11413	-1.74942	0.710855	-2.84521	-1.06255	-0.0171343	-1.36007	0.094045
	hsa-mir-142	-2.77566	-2.1881	0.016463	-1.32941	0.42175	-1.41601	-1.37176	0.824562	-1.35059	0.0666723
	hsa-mir-204	-1.87832	-3.08652	-0.70044	-3.67409	1.13375	-2.75489	-0.384441	0.0839388	-1.28938	0.0516611
	hsa-mir-143	-0.884649	-1.33479	-1.23842	-2.94489	-2.22802	0.592142	-0.614791	-3.16606	-1.28661	0.0125937
	hsa-mir-605	-1.32193	-1.86413	NA	-1.24714	-1.15849	-0.0544478	-1.4719	-1.28293	-1.28293	0.00124459
	hsa-mir-328	-4.16993	-0.764593	-2.41504	-1.43177	2.44611	-0.447459	-1.13061	-1.3369	-1.23376	0.123343
	hsa-mir-10b	1.43008	-0.073034	-1.24891	-1.16046	-3.96573	-2.56451	-1.90389	0.414171	-1.20469	0.104879
	hsa-mir-376c	0.870399	-1.70238	-1.39151	-0.13923	-0.203891	-2.36042	-1.01052	-1.92081	-1.20101	0.0373047
	hsa-mir-658	NA	0.720834	-2.32193	-1.13493	NA	NA	-1.14998	-1.22239	-1.14998	0.105277
	hsa-mir-3131	2.37851	0.111916	-3.70044	0.971713	-4.02982	-2.39232	1.83938	-2.80735	-1.1402	0.32898
	hsa-mir-3183	NA	1.3058	NA	-1.11221	-2.61221	-1.58496	-0.0504405	-1.1635	-1.13785	0.175135
	hsa-mir-488	NA	NA	NA	NA	-1.12678	NA	-3.14998	-0.485427	-1.12678	0.186668
	hsa-mir-887	-1.0906	-1.98966	-2.74416	1.05956	-1.34469	-0.430424	-1.14511	-0.564037	-1.11786	0.0362656
	hsa-mir-196a-1	-1.7625	-2.67148	0.435386	0.615138	-5.43084	-4.41918	-0.432844	0.095384	-1.09767	0.0753377
	hsa-mir-490	NA	-2.86413	NA	NA	-2.12196	3.18763	-0.0504405	NA	-1.0862	0.75541
	hsa-mir-130a	-0.490556	-0.609183	-1.10093	-1.05665	0.445675	-1.56446	-1.25686	-1.98987	-1.07879	0.00841734
	hsa-mir-1193	NA	NA	-1	-0.719892	-1.12678	NA	NA	-1.80735	-1.06339	0.0150561
	hsa-mir-20b	-1.074	-0.279166	3.41504	-3.44351	-1.04084	0.166778	-1.47648	-2.52411	-1.05742	0.317153
	hsa-mir-3188	0.415037	-1.27917	NA	-2.22239	NA	1	-0.828048	-3.39232	-1.05361	0.175393
	hsa-mir-1260	-4.90689	1.3058	-2.05063	-1.38131	-0.663381	-1.36257	-0.578689	0.256775	-1.01298	0.113784
	hsa-mir-411	-2.67391	-1.52853	-0.146841	-0.00321585	0.233621	-1.10356	-0.915006	-2.11495	-1.00928	0.0263632
	hsa-mir-199b	-1.53138	-1.13295	-1.16993	0.0762431	-0.855065	2.26252	0.389977	-2.25386	-0.994005	0.324888
	hsa-mir-876	NA	-0.279166	NA	NA	NA	-3.16993	-0.980051	NA	-0.980051	0.232011
	hsa-mir-337	-0.26748	-1.60109	-1.87447	0.727567	-0.719737	-1.22882	-0.463134	-1.78799	-0.974278	0.0247075
	hsa-mir-376a-1	1.37851	NA	-2.58496	0.695145	-2.44871	-2.94753	1.30946	-0.944858	-0.944858	0.315555
	hsa-mir-29c	0.0992893	-0.0602405	-2.40081	-2.44665	-0.0252751	-1.99929	-1.81093	0.0051788	-0.935583	0.0357912
	hsa-mir-146a	0.599515	-2.36062	-0.642271	-1.28627	0.342519	-3.12711	-1.18631	1.63308	-0.914293	0.218866
	hsa-mir-873	-1.32193	1.18027	0	-3.38286	-3.16241	-0.4975	0.499117	-2.51096	-0.909714	0.101344
	hsa-mir-199a-2	-1.21501	-1.38105	-0.104796	-0.689974	0.877643	0.52673	-1.09628	-1.69142	-0.893125	0.114308
	hsa-mir-373	NA	NA	NA	-0.889817	-1.38982	NA	0.581828	NA	-0.889817	0.439813
	hsa-mir-1827	-2.93664	NA	-0.31034	0.827123	-2.64418	-2.32193	-0.884771	1.44506	-0.884771	0.186967
	hsa-mir-381	0.765535	-1.06766	-0.823122	0.320185	-0.917063	-2.13245	-0.722555	-1.69842	-0.870093	0.0530518
	hsa-mir-192	-3.64506	-0.852053	-1.03348	-0.2431	-0.869497	-1.98498	-0.666012	0.80391	-0.860775	0.054927
	hsa-mir-28	-2.65662	-0.397719	-1.00424	-1.85874	-0.706598	0.477909	-1.377	-0.675149	-0.855418	0.01881
	hsa-mir-1538	NA	NA	NA	NA	NA	NA	-1.56501	-0.0703893	-0.817701	0.471386
	hsa-mir-186	-0.748731	0.921798	-1.07924	-0.882342	0	-1.1275	-1.43441	0.0401231	-0.815536	0.0948425
	hsa-mir-126	-1.14278	-0.61723	0.124651	-0.711908	0.754112	-0.908911	-1.18865	-0.938665	-0.81041	0.0465309
	hsa-mir-125b-1	-2.90689	-0.83556	-0.584963	-1.62418	1.80622	2.49033	-0.781332	-1.54201	-0.808446	0.459419
	hsa-mir-125a	-2.6865	0.533576	-0.942091	-2.143	0.878686	0.807913	-0.671525	-3.16892	-0.806808	0.147848
	hsa-mir-720	NA	NA	NA	NA	-0.804854	NA	-1.82805	-0.333424	-0.804854	0.154277
	hsa-mir-1179	-1.32193	NA	0	-1.55639	-0.126782	-1.58496	-0.787406	-0.600904	-0.787406	0.0136267
	hsa-mir-489	NA	NA	NA	-2.04182	-0.75905	1.58496	1.32807	-1.18587	-0.75905	0.778593
	hsa-mir-944	-3.16993	-2.27917	-0.415037	-1.52725	-0.402094	3.09954	-1.09295	1.34465	-0.753991	0.458442
	hsa-mir-342	-0.0466932	-2.03624	-1.61123	-1.25974	-0.189344	0.366835	-1.84155	-0.231748	-0.745745	0.035525
	hsa-mir-1537	NA	-0.864129	-0.736966	-1.94228	0.735715	-2.58496	0.360986	0.389042	-0.736966	0.212356
	hsa-mir-616	NA	NA	NA	NA	-1.38982	NA	NA	-0.0703893	-0.730103	0.467785
	hsa-mir-30c-1	-0.544321	0.194765	0.440573	-1.54301	0.365071	-0.906891	-1.28122	-1.10434	-0.725606	0.0896271
	hsa-mir-205	NA	NA	NA	-0.719892	NA	NA	NA	NA	-0.719892	NA
	hsa-mir-136	0.125077	-0.548353	-1.15948	0.0747237	0.510881	-1.74516	-0.844374	-1.69549	-0.696363	0.0643205
	hsa-mir-26a-1	0.678072	0.720834	-1.52356	-1.88136	-1.54901	-0.128584	-1.2266	-0.163499	-0.695048	0.128177
	hsa-mir-431	NA	-0.694204	-1	2.035	-2.26429	1.73697	2.24234	-3.29278	-0.694204	0.839767
	hsa-mir-125b-2	-2.32193	-0.694204	-0.584963	-2.26833	1.32068	0.736966	-0.645184	-1.01468	-0.669694	0.172528
	hsa-mir-664	-2.34477	-0.683946	-0.648237	-1.39651	0.592225	-0.391034	-1.07127	1.60001	-0.666091	0.243713
	hsa-mir-598	-2.152	1.17784	-3.23522	-0.735708	0.013906	-0.57839	0.2144	-0.737776	-0.657049	0.16709
	hsa-mir-624	NA	NA	1	-0.807355	0.684952	-1.12553	-0.828048	-0.485427	-0.646391	0.502917
	hsa-mir-487b	-1.39648	-0.516206	-1.33047	0.66904	0.0639424	-1.63931	-0.070249	-0.758958	-0.637582	0.0666727
	hsa-mir-559	NA	-0.279166	NA	-0.397964	-2.38982	-1.43296	-0.565014	-0.707819	-0.636416	0.033187
	hsa-mir-346	NA	NA	NA	0.280108	NA	NA	NA	-1.48543	-0.602659	0.618654
	hsa-mir-7-3	-0.906891	-0.279166	0	-1.42033	NA	-1.58496	0.657379	NA	-0.593029	0.157971
	hsa-let-7c	-0.49779	-2.25533	0.36809	-0.859777	3.02069	1.0548	-0.899687	-0.673115	-0.585452	0.873392
	hsa-mir-642	NA	-0.942131	-2.39232	-2.6948	-0.579294	0.281771	-0.172099	-0.171318	-0.579294	0.0716065
	hsa-mir-26a-2	1.1375	-0.864129	-1	-1.32821	-0.13134	-0.971317	-0.273	0.997571	-0.568565	0.3873
	hsa-mir-1249	NA	0.135871	NA	-0.567889	1.31062	NA	-1.30198	-1.22239	-0.567889	0.534662
	hsa-mir-153-1	NA	NA	NA	NA	NA	NA	-0.565014	NA	-0.565014	NA
	hsa-mir-3182	NA	NA	NA	NA	NA	NA	-0.565014	NA	-0.565014	NA
	hsa-mir-4262	NA	NA	NA	NA	NA	NA	-0.565014	NA	-0.565014	NA
	hsa-mir-4321	NA	NA	NA	NA	NA	NA	-0.565014	NA	-0.565014	NA
	hsa-mir-596	NA	NA	NA	NA	NA	NA	-0.565014	NA	-0.565014	NA
	hsa-mir-762	NA	NA	NA	NA	NA	NA	-0.565014	NA	-0.565014	NA
	hsa-mir-216a	-1.32193	NA	NA	3.60204	NA	-0.584963	-0.565014	1.09954	-0.565014	0.640145
	hsa-mir-216b	NA	NA	NA	-1.71989	5.29948	3.22239	-0.565014	-2.07039	-0.565014	0.598397
	hsa-mir-199a-1	NA	NA	0	-0.889817	0.107684	NA	-0.565014	-3.80735	-0.565014	0.224295
	hsa-mir-433	-2.7625	-0.677716	-0.765535	-0.420637	0.264781	1.67138	-0.0025458	-2.52544	-0.549177	0.243501
	hsa-mir-627	2.26303	-1.27917	-0.415037	-1.13493	-0.679323	-2.32193	-0.149976	0.0551416	-0.54718	0.363411
	hsa-mir-106a	2.39232	0.135871	0.710493	-1.45391	-1.22966	0.309328	-1.38215	-1.38589	-0.546894	0.640855
	hsa-mir-766	-0.407658	-5.32356	-0.823122	-0.88178	0.428636	0.884523	-0.66935	0.143591	-0.538504	0.260989
	hsa-mir-504	-3	2.94323	-0.847997	-3.87333	-0.175792	0.682518	0.0025458	-1.08001	-0.511894	0.402074
	hsa-mir-138-2	0.263034	-1.27917	2	-1.79028	-2.12678	1	-1.43948	1.51457	-0.508066	0.697185
	hsa-mir-144	-2.25322	-0.615553	0.855052	-1.32285	0.282157	-3.40827	-0.393354	-0.044535	-0.504453	0.12628
	hsa-mir-146b	1.33903	-2.17814	-2.59499	-0.322066	0.455542	-0.686802	-1.13966	-0.318152	-0.504434	0.180847
	hsa-mir-615	NA	NA	NA	NA	NA	NA	0.434986	-1.43296	-0.498987	0.687623
	hsa-mir-132	-1.1479	-0.722773	-0.265894	-0.253324	0.36655	0.119981	-1.07914	-2.31039	-0.494334	0.0649511
	hsa-mir-942	0.415037	-0.568673	-0.63743	-0.413231	-1.49673	-1.58496	-0.289379	-0.333424	-0.490952	0.0330585
	hsa-mir-500b	-1.73697	-0.601095	NA	-0.371969	-1.38982	NA	2.07884	0.652077	-0.486532	0.707393
	hsa-mir-133a-2	NA	NA	NA	NA	NA	NA	NA	-0.485427	-0.485427	NA
	hsa-mir-770	NA	NA	NA	NA	NA	NA	NA	-0.485427	-0.485427	NA
	hsa-mir-1468	NA	-0.694204	0.415037	-3.71989	3.839	NA	NA	-0.485427	-0.485427	0.920306
	hsa-mir-3155	NA	1.3058	NA	NA	NA	NA	-1.14998	-0.485427	-0.485427	0.894655
	hsa-mir-573	NA	NA	NA	0.86507	NA	NA	-1.56501	-0.485427	-0.485427	0.630648
	hsa-mir-376b	1.59318	0.720834	-1.72583	0.182811	-0.402755	-1.28662	-0.565014	-1.48543	-0.483884	0.393036
	hsa-mir-576	-0.68966	-0.016132	-0.415037	-0.073529	-1.13278	-1.37702	-0.338243	-0.551516	-0.483277	0.0117106
	hsa-mir-495	0.13493	-0.831707	-0.801316	0.564411	0.0362554	-0.647528	-0.307592	-1.54262	-0.47756	0.115446
	hsa-mir-3151	NA	NA	NA	NA	0.195146	NA	-1.14998	NA	-0.477415	0.607012
	hsa-mir-15a	2.63101	-0.790756	-1.26011	0.0121388	-0.334952	-2.39904	-0.599801	1.10056	-0.467377	0.714555
	hsa-mir-1274b	-0.643856	1.14968	-0.289507	0.00984194	-0.966443	-0.67516	-1.70746	-0.106915	-0.466681	0.211737
	hsa-mir-191	-0.390044	-1.28756	0.227418	0.729504	-0.726457	-1.23084	-0.539528	-0.22483	-0.464786	0.119446
	hsa-mir-548b	NA	1.72083	0.584963	-0.456858	-0.612209	-2.16993	-2.56501	0.0291463	-0.456858	0.414954
	hsa-mir-412	NA	NA	NA	1.01707	-0.974779	NA	0.0199488	-0.925999	-0.453025	0.677451
	hsa-mir-152	-1.45519	-1.10144	-0.626213	-0.768732	0.287565	0.924005	-0.228083	0.610521	-0.427148	0.355979
	hsa-mir-628	-0.77444	0.720834	-1.09954	-1.19989	0.471856	0.0931094	-0.267813	-0.581642	-0.424727	0.231124
	hsa-mir-214	-1.14009	-0.864129	-0.736966	-0.078071	1.50942	0.838516	0.470585	-1.93674	-0.407518	0.56651
	hsa-mir-206	-0.906891	NA	1	0.0995357	-2.26429	NA	-1.25689	1.43523	-0.403677	0.608211
	hsa-mir-194-2	1.041	-0.635706	-1.90034	0.153262	-2.47452	-0.94009	-0.0177588	-0.164395	-0.400051	0.169704
	hsa-let-7g	-1.09089	-0.482542	-0.0249891	-0.67658	0.875175	-0.316057	-1.02502	0.83286	-0.3993	0.403829
	hsa-mir-639	-1.90689	NA	NA	-2.04182	-0.389816	NA	0.0199488	0.929611	-0.389816	0.301021
	hsa-mir-140	-3.90677	-0.517742	-0.25596	-1.49474	0.139787	0.358821	-1.55954	-0.0814972	-0.386851	0.107129
	hsa-mir-499	2.28011	-0.532453	-2.6386	-0.234699	2.45581	-0.600176	2.07516	-1.28147	-0.383576	0.781936
	hsa-mir-326	-1	-1.27917	-0.874469	1.15005	0.128032	0.263034	0.271488	-1.58496	-0.373218	0.3125
	hsa-mir-200c	2.22739	-0.358814	-0.483884	-0.380921	-3.8928	-1.71193	-0.21369	1.87261	-0.369868	0.606291
	hsa-mir-30e	0.987676	0.27832	0.155482	-1.18296	-0.530145	-0.597736	-0.321736	-0.413506	-0.367621	0.41374
	hsa-mir-556	-0.684498	-0.864129	1	-0.26738	-0.445311	-0.280108	-0.629144	-0.173483	-0.36271	0.191697
	hsa-mir-26b	1.05894	-0.73619	-0.38943	-1.23384	-0.333053	0.78279	-0.388815	-0.272584	-0.360934	0.502299
	hsa-mir-1243	NA	NA	0	-0.719892	NA	NA	NA	NA	-0.359946	0.5
	hsa-mir-34c	-1.13327	-0.757344	2.67671	-0.69016	0.703557	1.5597	-0.0918463	-0.621799	-0.356823	0.6762
	hsa-mir-590	2.69367	0.56883	-1.87971	0.0558928	-0.758394	-2.35869	-1.70524	0.387743	-0.351251	0.542721
	hsa-mir-539	-0.862496	-0.748652	-0.765535	0.14747	0.556654	0.83727	0.0479632	-2.61409	-0.350344	0.306272
	hsa-mir-16-2	-0.507484	0.514383	0.560715	-0.555773	0.784917	-1.15016	-0.472111	-0.209928	-0.34102	0.60595
	hsa-mir-101-2	1.24135	-0.0748929	-0.599121	-1.4476	1.00822	-1.77856	-0.955544	0.316966	-0.337007	0.487501
	hsa-mir-654	-0.0995357	-1.27917	-0.560715	0.404198	0.384971	-1.16136	0.248974	-2.34501	-0.330125	0.156643
	hsa-mir-148a	0.321078	-2.49211	-1.97981	-2.01377	0.406883	0.37432	-0.96942	1.54589	-0.324171	0.284226
	hsa-mir-3145	0.263034	NA	0	1.45003	-0.942357	-0.36257	-0.324006	-1.73335	-0.324006	0.553166
	hsa-mir-660	2.53317	-0.527094	-1.26344	-0.554407	0.127225	-0.517372	-0.128496	0.522236	-0.322934	0.954398
	hsa-mir-3130-2	NA	NA	NA	NA	NA	NA	-1.14998	0.514573	-0.317701	0.767853
	hsa-mir-668	NA	NA	NA	-0.304855	1.61018	-1.58496	2.43499	-1.29278	-0.304855	0.838883
	hsa-let-7f-1	0.629573	-0.362187	0.283943	-0.862039	-0.246756	-1.33269	-1.26242	0.446402	-0.304471	0.249611
	hsa-mir-579	NA	NA	-1	-0.0093987	-0.541819	-0.263034	-0.342621	0.514573	-0.302828	0.24491
	hsa-mir-937	NA	-0.279166	NA	-0.304855	NA	NA	NA	NA	-0.292011	0.0279837
	hsa-mir-193b	-2.07237	-2.3433	0.312503	-0.674484	0.414272	0.23123	0.100244	-1.00073	-0.28712	0.148532
	hsa-mir-760	NA	1.89076	NA	-1.12199	-1.61221	2.22239	0.550464	-2.91169	-0.285763	0.852542
	hsa-mir-7-1	-0.375968	-0.195102	0.364572	0.106079	-1.62011	-1.28989	-0.414744	0.961089	-0.285535	0.334614
	hsa-mir-637	-1.32193	NA	0	NA	0.195146	NA	-0.565014	NA	-0.282507	0.30215
	hsa-mir-3126	NA	-0.279166	NA	0.280108	-0.389816	0.736966	NA	-0.485427	-0.279166	0.911743
	hsa-mir-767	NA	-0.279166	NA	NA	NA	NA	5.6802	-0.807355	-0.279166	0.538279
	hsa-mir-3135	NA	-0.279166	NA	NA	0.195146	NA	NA	-0.485427	-0.279166	0.445586
	hsa-mir-3192	NA	-0.279166	-2	0.491612	-0.0272461	-0.584963	0.813498	-0.748461	-0.279166	0.375708
	hsa-mir-218-1	0.485427	-0.279166	NA	-1.54092	0.686999	0.187627	-1.56501	-0.539875	-0.279166	0.328935
	hsa-mir-486	-0.321928	-0.205166	0	-1.82681	0.909744	-3	-2.0345	1.5541	-0.263547	0.298572
	hsa-mir-99b	-4.19923	1.34825	0.53811	-1.90491	-0.462206	0.723354	-0.0614619	-2.17879	-0.261834	0.275861
	hsa-mir-134	2.44057	-0.663081	-0.775877	1.18193	0.140699	-0.68226	0.393467	-1.87774	-0.261191	0.967958
	hsa-mir-1278	-0.473931	1.81844	0.584963	-0.444527	-0.394765	0.560088	-0.473091	-0.125595	-0.26018	0.661819
	hsa-mir-580	NA	NA	NA	NA	NA	-2.58496	NA	2.09954	-0.242713	0.934265
	hsa-mir-544b	0.0931094	NA	1	-1.42033	-0.559741	NA	NA	NA	-0.233316	0.694062
	hsa-mir-149	-1.32193	1.3058	1	-1.52725	-0.942357	0.222392	-0.565014	0.0995357	-0.232739	0.577791
	hsa-mir-425	0.16575	-0.606207	-0.528791	2.31577	-1.66222	-1.26459	0.071914	2.15575	-0.228439	0.880163
	hsa-mir-155	0.305028	-2.6235	-0.180408	-0.449951	-0.27608	1.33583	-0.722718	1.47467	-0.228244	0.763968
	hsa-mir-30b	2.04445	0.162588	-1.76553	-0.691878	-0.437019	-0.63934	0.09214	0.00275834	-0.21713	0.699755
	hsa-mir-1306	-0.862496	0.0311737	1.078	-0.456858	-0.167424	1.52356	-0.239918	-1.25245	-0.203671	0.899114
	hsa-mir-7-2	-1	-1.86413	0.222392	0.695145	-0.679323	1.58496	0.434986	-0.62293	-0.200269	0.702953
	hsa-mir-1277	1.1375	1.38826	-0.234465	-0.797895	-0.165256	-1.71823	0.0657525	-1.04628	-0.199861	0.659229
	hsa-mir-34b	2.43296	NA	0.893085	-0.205319	0.508304	-0.197939	-0.645934	-1.41831	-0.197939	0.691334
	hsa-mir-320a	-0.687293	0.0070869	1.47529	-0.588552	-0.395809	0.842654	0.154043	-1.17109	-0.194361	0.886059
	hsa-mir-379	0.70044	-1.19955	-0.332196	-0.0446188	-1.93812	0.626542	0.0417532	-1.81036	-0.188408	0.219022
	hsa-mir-564	NA	NA	NA	NA	0.195146	NA	-0.565014	NA	-0.184934	0.711712
	hsa-mir-1181	NA	NA	NA	-1.30485	0.195146	NA	-0.565014	0.514573	-0.184934	0.527552
	hsa-mir-655	0.791413	-0.819735	-0.321928	0.558409	-0.0368004	-0.927355	0.373586	-1.86047	-0.179364	0.402622
	hsa-mir-371	NA	-0.279166	NA	0.780678	-0.642797	-0.0614005	0.360557	-0.62293	-0.170283	0.749753
	hsa-mir-1289-1	NA	NA	NA	0.280108	NA	-0.584963	NA	NA	-0.152427	0.784304
	hsa-mir-16-1	3.25298	-0.279166	-0.0238467	-0.52967	1.01651	-1.94421	-0.587244	1.66104	-0.151507	0.589527
	hsa-mir-516b-1	NA	NA	NA	NA	NA	NA	-0.149976	NA	-0.149976	NA
	hsa-mir-339	-1.03242	0.761972	0.847997	-0.608471	-0.126782	-0.169925	-0.424532	0.950342	-0.148353	0.927463
	hsa-mir-374a	-0.71368	1.29444	-0.298297	-0.830765	1.56625	-0.511803	0.0057006	0.0908423	-0.146298	0.819187
	hsa-mir-570	1.1375	NA	NA	-1.04182	1.41754	-1.58496	-0.482551	0.192645	-0.144953	0.906543
	hsa-mir-485	-4.00643	-1.46526	-0.254317	-0.032549	0.321233	1	0.0892677	-2.51377	-0.143433	0.192462
	hsa-mir-3199-1	NA	-0.279166	0	-2.71989	1.19515	NA	NA	NA	-0.139583	0.621086
	hsa-mir-652	-1.0196	-0.00977654	-1.41409	1.4505	0.448903	-0.886853	-0.262915	1.93501	-0.136346	0.944951
	hsa-mir-154	1.67807	-1.4808	-0.395929	0.325623	-0.0134403	-0.107915	-0.161117	-2.026	-0.134516	0.514105
	hsa-mir-10a	0.840526	1.14205	0.199572	-0.462278	-0.717656	-1.78069	-1.19085	1.69011	-0.131353	0.937158
	hsa-mir-653	NA	0.720834	NA	-3.17932	-0.974779	1	2.24234	-1.80735	-0.126973	0.70167
	hsa-mir-1287	1	0.506095	-0.0740006	-0.179324	-0.620429	1.22239	-1.47755	-1.98793	-0.126662	0.630605
	hsa-mir-200b	-0.144085	0.166962	-0.107241	-0.423715	-2.90034	-1.5521	0.0527289	1.57455	-0.125663	0.400832
	hsa-mir-320b-1	NA	NA	NA	-0.456858	0.847223	NA	-0.243086	0.0170735	-0.113006	0.894744
	hsa-mir-135a-1	NA	NA	NA	-1.30485	1.07967	NA	-1.56501	2.09954	-0.112593	0.936879
	hsa-let-7a-3	-0.156119	-0.260551	1.00232	-0.0684246	0.749693	1.60652	-0.530532	-0.20665	-0.112272	0.350906
	hsa-let-7e	-0.194018	-0.0675333	1.44013	-0.890661	0.548529	0.214127	-0.151414	-1.4942	-0.109474	0.818666
	hsa-mir-374b	1.0624	0.790564	-0.0153363	-0.88844	0.523004	-1.53688	-0.190885	-0.426093	-0.103111	0.790541
	hsa-mir-2861	NA	NA	NA	0.280108	NA	NA	NA	-0.485427	-0.102659	0.833182
	hsa-mir-3163	NA	NA	NA	0.280108	NA	NA	NA	-0.485427	-0.102659	0.833182
	hsa-mir-1273c	NA	NA	NA	-0.719892	NA	NA	NA	0.514573	-0.102659	0.895077
	hsa-mir-454	2.73697	1.3058	-0.169925	0.655617	-0.172585	-2.35435	-0.00862031	-0.699552	-0.0892727	0.767618
	hsa-mir-299	3.77158	-0.172251	-1.47999	1.42821	-0.42805	0.0453919	-0.142781	-0.0273206	-0.0850506	0.525346
	hsa-mir-101-1	2.12102	0.595303	-0.514573	-1.44074	0.344524	-1.22741	-1.90946	1.34746	-0.0850246	0.8701
	hsa-mir-744	-1.65635	1.46789	2.05819	-1.18495	0.339009	0.635086	-0.504664	-1.77934	-0.0828275	0.881997
	hsa-mir-127	0.0437214	-0.328748	-0.0757778	-0.223513	-0.0881384	1.30672	0.273669	-2.40954	-0.0819581	0.623351
	hsa-mir-3115	NA	NA	NA	0.280108	-0.389816	-2.58496	-0.0795868	1.19265	-0.0795868	0.639984
	hsa-mir-18b	NA	NA	NA	-1.71989	-0.067888	-1.44746	-0.0795868	0.514573	-0.0795868	0.266089
	hsa-mir-1271	-0.791413	-0.971044	1.37851	0.146841	1.60411	2.24793	-0.301979	-2.14439	-0.0775689	0.7902
	hsa-mir-380	1.848	NA	NA	0.280108	-0.652851	-0.432959	3.60491	-1.48543	-0.0764257	0.522552
	hsa-mir-1295	-1.32193	0.528188	0	-0.719892	5.65458	NA	-0.149976	NA	-0.0749881	0.547243
	hsa-mir-582	2.66158	0.798836	0.384664	-0.689518	-1.04831	-0.984058	-0.359695	0.221526	-0.0690843	0.784068
	hsa-mir-372	NA	NA	NA	0.51378	-1.19312	-0.0655883	0.17304	-0.485427	-0.0655883	0.512344
	hsa-mir-3173	NA	NA	2	-1.44236	-0.126782	0	-0.243086	0.234465	-0.0633909	0.882854
	hsa-mir-200a	-0.131793	0.800517	-0.340731	0.0175388	-3.45691	-1.76607	0.391743	0.794317	-0.0571271	0.401116
	hsa-mir-541	NA	-0.279166	-1	-0.0569271	0.195146	0.662965	0.756914	-3.48543	-0.0569271	0.438623
	hsa-mir-196a-2	1.40926	-1.97961	0.17568	0.705344	-4.49118	-3.94225	0.283534	-0.285279	-0.0547996	0.234031
	hsa-mir-301a	0.192645	1.47086	-0.289507	1.02888	-0.667873	-0.373815	0.751594	-0.317202	-0.0484308	0.439015
	hsa-mir-153-2	NA	NA	NA	0.280108	NA	0	-1.98005	-0.0703893	-0.0351947	0.455719
	hsa-mir-365-1	-1.58496	-1.65768	0.389947	-0.0218358	1.2684	0.120294	-0.0236404	-0.820411	-0.0227381	0.438213
	hsa-mir-487a	1.90046	-1.27917	-0.222392	1.84401	0.195146	-0.510962	0.485612	-1.29278	-0.013623	0.758632
	hsa-mir-197	-0.2824	-0.997395	-0.158698	0.389256	-0.563569	1.60145	0.556977	0.132524	-0.0130868	0.771221
	hsa-mir-3202-1	-0.321928	0.305796	NA	-1.94228	0.387791	NA	-2.14998	0.80408	-0.00806602	0.388979
	hsa-mir-1291	-3.26053	-2.03405	0	-2.35322	0.129057	0.415037	-0.0123226	0.576922	-0.00616129	0.16401
	hsa-mir-377	1.18057	0.135871	-2.558	2.17319	-0.0297727	-1.29207	0.0199488	-0.0596629	-0.00491192	0.918375
	hsa-mir-874	-1.57347	0.0427616	-1.48543	0.367571	1.81032	0.25634	-0.139708	-0.0524674	-0.00485289	0.806598
	hsa-mir-1229	NA	NA	0	NA	NA	NA	NA	NA	0	NA
	hsa-mir-1914	NA	NA	NA	NA	NA	0	NA	NA	0	NA
	hsa-mir-518c	NA	NA	0	NA	NA	NA	NA	NA	0	NA
	hsa-mir-320e	NA	NA	0	-0.719892	1.19515	NA	0.171952	-0.807355	0	0.933773
	hsa-mir-128-2	NA	-1.60109	0	-0.652778	1.68057	1.58496	0.619411	-0.347923	0	0.699384
	hsa-mir-1976	-0.959358	NA	0	-0.719892	0.816635	NA	0.0199488	0	0	0.608764
	hsa-mir-340	0.522241	0.358263	-0.562661	-0.379196	1.07973	0.107564	-0.0891322	-0.845101	0.00921606	0.917017
	hsa-mir-23b	-0.0778285	0.304731	0.745662	-0.365417	-1.00845	0.100294	-0.313489	2.15586	0.0112328	0.582617
	hsa-mir-1307	-1.02287	1.96468	-0.0147781	0.309571	-0.393361	0.298784	0.0521429	-0.982776	0.0186824	0.938971
	hsa-mir-33a	-1.00887	1.28408	-0.0263113	0.707595	-1.33691	-1.04952	0.075946	1.0107	0.0248174	0.907266
	hsa-mir-370	0.678072	-0.542201	-0.169925	0.223524	-1.17409	1.73697	0.331893	-2.2755	0.0267997	0.739107
	hsa-let-7f-2	1.00942	-0.455968	0.0054196	-0.391407	1.29474	-1.52213	0.0527094	1.56442	0.0290645	0.611735
	hsa-mir-219-1	0.0220263	-0.279166	2.16993	0.771094	-0.242975	-0.584963	0.0376508	0.80408	0.0298386	0.318468
	hsa-mir-574	-3.30448	1.00211	1	-0.616429	0.673402	-0.601936	-1.00077	0.92229	0.035733	0.661211
	hsa-mir-15b	1.8712	-0.646224	0.0593785	0.0633086	-0.502079	0.0173429	-0.463241	0.20458	0.0383607	0.795107
	hsa-mir-184	-0.321928	-1.01613	1.22239	-0.826807	-1.61221	2.32193	1.93749	0.415037	0.0465547	0.620611
	hsa-mir-551a	NA	NA	4.45943	-1.71989	0.0576428	NA	2.01995	-2.94486	0.0576428	0.790883
	hsa-mir-484	0.678072	-2.11567	0.304855	0.257147	0.32867	-0.527629	-0.141363	-2.14975	0.0578919	0.321401
	hsa-mir-222	-0.983891	0.151206	0.544617	-0.283129	-0.327594	0.930116	0.831091	-0.0338232	0.0586915	0.665242
	hsa-mir-1256	NA	NA	1	NA	-0.389816	NA	-0.565014	0.514573	0.0623785	0.731592
	hsa-mir-3127	1.29698	-1.65768	0.584963	-0.35901	-1.50529	0.514573	-0.403859	1.45709	0.0777814	0.983311
	hsa-mir-29b-2	4.40599	0.691289	-0.156402	0.115688	0.0590216	-2.06413	-0.0163607	0.47363	0.0873548	0.514674
	hsa-mir-320c-2	1.76553	-0.41667	1.36257	-1.49967	0.599537	1.06711	-0.456954	-0.852044	0.0914333	0.648732
	hsa-mir-548e	-1.71786	1.08898	-0.954196	-1.12325	0.341988	0.0104166	0.175284	0.823778	0.0928502	0.644336
	hsa-mir-1826	-0.352486	1.31355	0.353637	-0.591159	3.30367	0.111645	0.0788425	-0.146625	0.0952439	0.292743
	hsa-mir-1285-1	NA	NA	0	0.280108	0.873218	-1.58496	-0.565014	0.192645	0.0963225	0.714863
	hsa-mir-625	-0.321928	NA	NA	1.5025	0.195146	0	-0.565014	0.862496	0.0975732	0.417919
	hsa-mir-3190	-0.321928	0.528188	-1.58496	0.86507	-0.634929	2.87447	0.560517	-0.807355	0.10313	0.712584
	hsa-mir-3200	0	-0.601095	2.11548	-0.219463	-1.23781	0.511899	0.20871	0.263034	0.104355	0.7171
	hsa-mir-3165	NA	NA	2	-0.304855	-1.61221	-1	1.24234	0.514573	0.104859	0.812321
	hsa-mir-410	-0.736966	2.18027	-1.15754	1.28011	-0.0749428	0.118941	0.0910319	0.618409	0.104987	0.468491
	hsa-mir-362	1.0469	-0.279166	-1.1774	0.917372	-0.201028	-0.931952	0.419053	1.37024	0.109013	0.67494
	hsa-mir-22	0.464079	-0.185646	-1.17323	-0.143231	0.677206	0.126614	0.0984322	1.13452	0.112523	0.622555
	hsa-mir-769	3.70782	1.09587	-0.10497	0.280108	-0.3712	-0.169925	0.499117	-0.051024	0.114542	0.236698
	hsa-mir-548v	NA	0.305796	0.807355	-0.382857	-0.389816	0.115477	-0.734939	0.736966	0.115477	0.780218
	hsa-mir-103-1	-0.0681715	1.42127	-0.429988	0.154577	0.22449	0.946107	-0.653145	0.083416	0.118997	0.41335
	hsa-mir-34a	2.97085	-1.05387	0.772867	0.501048	-0.4715	-0.787271	-0.240937	2.71621	0.130056	0.345756
	hsa-mir-548k	-0.08092	0.383799	0.526069	0.151784	-0.294659	0.111361	-0.238091	0.914814	0.131572	0.243919
	hsa-mir-369	0.378512	0.305796	-0.0593785	0.699868	0.710965	-0.304855	-0.0399226	-0.868755	0.132937	0.603455
	hsa-mir-19b-1	4.72247	NA	-1.32193	4.13809	0.140699	-2.21299	-0.565014	3.974	0.140699	0.293459
	hsa-mir-502	2.42778	-0.545061	0.130704	0.978157	-0.241011	-0.267192	0.157551	1.15163	0.144127	0.217304
	hsa-mir-532	0.292234	-0.33796	0.399171	-1.0288	0.45102	-0.0768353	0.00877325	0.587245	0.150504	0.849454
	hsa-mir-423	0.0433425	0.375782	1.83243	-0.710297	0.543619	0.210703	0.0944925	-0.0810817	0.152598	0.298191
	hsa-mir-106b	4.23312	1.96138	-0.57381	1.56325	-0.246702	-1.70643	0.178063	0.131229	0.154646	0.322667
	hsa-mir-30d	0.682963	1.15471	-0.947328	-0.502919	-1.14187	0.857943	0.537556	-0.227813	0.154871	0.87152
	hsa-mir-320c-1	1	0.457799	1.32193	-0.171271	-0.882856	2.58496	-0.126893	-0.756281	0.165453	0.334445
	hsa-mir-19b-2	NA	0.720834	0.321928	2.86507	-1.80485	-3.07039	0.0199488	NA	0.170938	0.858931
	hsa-mir-330	-3.71425	0.725541	1.49154	-0.0869023	-0.443474	3.31371	0.434125	-0.307857	0.173611	0.809218
	hsa-mir-1255a	-2.0282	-2.27917	1.30743	-0.0162026	-0.76091	1.34001	0.378403	1.81287	0.1811	0.956858
	hsa-mir-656	-0.222392	NA	NA	0.810623	0.742634	-0.415037	0.586989	-2.18587	0.182299	0.816165
	hsa-mir-382	-1.33787	-0.846207	0.0691836	1.10638	0.301849	2.07173	0.664811	-1.25046	0.185516	0.824662
	hsa-mir-651	-0.643856	0.668366	0.736966	0.0237682	-1.33537	-0.722466	0.350097	0.736966	0.186933	0.936172
	hsa-let-7i	-0.157032	-0.545229	0.37466	0.0142545	0.346209	0.235812	0.146081	0.8212	0.190947	0.315311
	hsa-mir-1258	NA	NA	NA	NA	0.195146	NA	NA	NA	0.195146	NA
	hsa-mir-3139	NA	-0.279166	NA	0.543142	0.610184	-0.584963	-0.149976	0.836501	0.196583	0.519056
	hsa-mir-548l	-0.514573	0.20626	-1.58496	0.840823	0.223161	0.415037	0.14548	0.206451	0.206356	0.977012
	hsa-mir-141	2.53605	0.68188	-1.14251	0.584507	-3.22836	-3.46757	-0.171618	2.30324	0.206445	0.774771
	hsa-mir-496	0.678072	-0.542201	-0.263034	2.20611	0.988695	-0.4975	3.24234	-1.48543	0.207519	0.362823
	hsa-mir-500	-0.145339	0.173884	0.971618	0.26213	0.00786779	0.0515303	0.247202	1.20931	0.210543	0.0809172
	hsa-mir-1296	0.137504	-0.435286	-0.222392	0.65862	0.292444	-1.36257	0.434986	1.09954	0.214974	0.785783
	hsa-mir-151	-1.39097	1.10979	-0.00578815	-0.646991	1.07592	0.351892	0.0873674	0.731375	0.21963	0.60675
	hsa-mir-2277	-0.736966	0.983868	-0.415037	0.280108	-1.26429	1.73697	0.200521	0.893085	0.240315	0.567889
	hsa-mir-1284	0.678072	-0.279166	1	-1.15285	-0.29028	2.77259	1.01995	-0.19592	0.241076	0.331384
	hsa-mir-181c	-0.584963	1.46807	0	0.864275	0.509353	-0.209595	-0.535536	1.01153	0.254677	0.279893
	hsa-mir-323	-3.32193	0.528188	0.70044	-0.140545	0.574492	1.76377	-0.013218	-2.9433	0.257485	0.594644
	hsa-mir-33b	0.448985	-0.0239094	0.277985	0.733713	0.250968	-1.58496	0.352275	-0.0737021	0.264477	0.854278
	hsa-mir-4309	NA	NA	NA	1.01707	NA	1.41504	-1.30198	-0.485427	0.265823	0.816495
	hsa-mir-361	1.83829	0.460153	-1.55444	0.608378	0.0852913	-1.43801	0.0784841	0.769292	0.272722	0.798782
	hsa-mir-128-1	0.0703893	1.28205	2.21791	-0.447893	0.487396	0.046921	1.2906	-1.74149	0.278893	0.383844
	hsa-mir-758	NA	NA	-1.58496	0.280108	0.387791	0	0.434986	NA	0.280108	0.812079
	hsa-mir-3157	NA	NA	NA	0.280108	-0.126782	NA	0.434986	NA	0.280108	0.362351
	hsa-mir-1197	NA	-0.279166	1	0.280108	0.195146	-0.847997	1.01995	1.51457	0.280108	0.23359
	hsa-let-7a-2	1.54885	-1.03698	1.02234	-0.109035	1.30264	0.229026	-0.127987	0.336391	0.282708	0.233572
	hsa-mir-1226	NA	NA	NA	-0.0418202	0.610184	NA	NA	NA	0.284182	0.543564
	hsa-mir-1294	0.263034	0.305796	1.97863	-0.556393	-2.89232	0.736966	-1.09553	1.17754	0.284415	0.985131
	hsa-mir-3129	-1.05889	-0.279166	0.874469	0.417611	0.75154	0.152003	1.52245	-0.807355	0.284807	0.546334
	hsa-mir-25	-1.22398	1.54059	0.856842	0.754151	0.579685	0.00242953	-0.355196	-0.263561	0.291057	0.465757
	hsa-mir-432	-1.2863	-1.88879	0.20482	0.616991	0.842226	2.25298	0.381526	-2.00968	0.293173	0.839308
	hsa-mir-2110	2.43296	0.610651	0.793549	-0.843764	-2.95866	0.321928	0.269927	0.231843	0.295928	0.849027
	hsa-let-7b	0.116468	-1.64293	1.29448	-0.215758	1.33026	1.61141	-0.361695	0.480086	0.298277	0.424639
	hsa-mir-320b-2	2	0.646833	1.90689	-0.794882	-0.0189784	0.190331	0.40653	-1.51438	0.298431	0.435409
	hsa-mir-221	-2.70144	0.244742	0.601155	0.248303	-0.698342	0.672273	0.860417	0.356549	0.302426	0.903336
	hsa-mir-18a	4.80301	2.05827	0.0379679	2.47301	-0.895762	-1.64699	0.568253	-0.324962	0.30311	0.274273
	hsa-mir-1275	NA	NA	NA	1.41761	1.19515	NA	-0.58704	-1.45226	0.304053	0.849946
	hsa-mir-1303	NA	NA	NA	NA	2.19515	-1.58496	NA	NA	0.305092	0.898116
	hsa-mir-409	-1.72469	0.272476	0.183222	0.987554	0.366778	2.56139	0.96695	-1.02622	0.319627	0.505635
	hsa-mir-103-2	-1.31733	2.72083	-0.00448972	0.675374	0.212673	0.669169	0.430606	-0.625621	0.321639	0.434546
	hsa-mir-185	1.48778	-0.0993098	0.624069	0.043521	-1.437	1.0551	0.609183	-0.817189	0.326352	0.608996
	hsa-mir-629	0.650058	-0.141663	0.341037	0.33177	-1.21514	1.3744	-1.27037	0.948623	0.336403	0.71796
	hsa-mir-765	NA	NA	NA	-1.35216	0.517074	0.736966	0.341877	-2.54432	0.341877	0.511429
	hsa-mir-659	-1.90689	2.72083	0.485427	-1.12428	0.352688	2	-1.38215	0.336236	0.344462	0.756099
	hsa-mir-365-2	0.356144	-1.53292	2.11548	-1.98773	0.333853	0.793549	2.17253	-0.909778	0.344998	0.769557
	hsa-mir-203	0.368096	-2.0571	0.326771	0.396701	-2.70526	-0.3684	1.7345	3.0621	0.347433	0.889989
	hsa-mir-130b	0.109001	1.62772	0.793732	0.965936	-0.836821	-0.841475	0.181606	0.514573	0.34809	0.334077
	hsa-mir-23a	0.776221	0.419159	-0.322921	0.281771	-0.417911	0.0694677	0.443513	1.69849	0.350465	0.163451
	hsa-mir-1975	2.6118	1.59025	-0.623437	-1.07943	0.0956107	0.507402	1.89816	0.196603	0.352002	0.193735
	hsa-mir-181d	0.28941	0.301209	-0.0680454	1.29883	0.552938	0.407212	0.0471591	0.510965	0.35421	0.024909
	hsa-mir-3138	NA	0.720834	0.321928	0.387023	-0.126782	NA	0.756914	-0.842979	0.354476	0.448408
	hsa-mir-187	NA	2.18027	NA	-3.52725	-0.724235	2.22239	1.43499	-5.86047	0.355376	0.624397
	hsa-mir-1236	NA	NA	NA	0.280108	NA	NA	0.434986	NA	0.357547	0.135785
	hsa-mir-671	0.415037	1.15379	-1.41504	0.773923	-0.110662	0.306331	-0.251514	1.16367	0.360684	0.427465
	hsa-mir-641	-1.09954	1.13587	1.25154	-0.0698346	0.227936	0.946758	0.161968	0.493963	0.36095	0.203169
	hsa-mir-383	NA	0.305796	NA	-4.66073	0.431847	3.80735	1.34752	-4.20945	0.368821	0.727929
	hsa-mir-32	3.65951	1.51225	-0.769702	0.570127	0.171228	-3.5878	-0.483484	0.621729	0.370677	0.779891
	hsa-mir-212	-0.206451	0.930287	1.02975	0.871688	-0.126782	0.994982	-0.377928	-0.530281	0.372453	0.226272
	hsa-mir-429	1.15585	0.833808	-0.703545	0.147356	-3.24322	-1.99551	0.613813	0.963326	0.380585	0.635796
	hsa-mir-589	-1.09954	0.965456	0.836501	1.05772	-0.0503297	-1.11366	-0.168124	1.49546	0.393086	0.518451
	hsa-mir-543	-1.32193	0.481163	1.18057	0.152032	0.308195	0.823122	0.538698	-3.77083	0.394679	0.735695
	hsa-mir-3158-1	NA	NA	NA	0.280108	NA	NA	NA	0.514573	0.397341	0.182648
	hsa-mir-548n	-1.32193	NA	1.32193	0.405639	-1.80485	-1.16993	1.69802	0.85561	0.405639	0.996814
	hsa-mir-3140	-0.584963	0.0427616	1.41504	-0.549967	0.780109	1	0.827304	-0.62293	0.411435	0.350906
	hsa-mir-505	0.917538	-0.971044	0.337035	-0.0302983	0.48873	1.1773	0.673334	-0.918094	0.412882	0.482884
	hsa-mir-3176	NA	0.720834	0.415037	2.36757	-1.26429	-0.169925	0.434986	-1.29278	0.415037	0.72944
	hsa-mir-618	NA	-1.27917	0.415037	1.69515	2.68057	0	2.01995	-2.48543	0.415037	0.559061
	hsa-mir-1301	0.900464	0.474923	0.713696	-0.808394	-0.81791	1.58496	0.365894	-2.3905	0.420409	0.995027
	hsa-mir-148b	0.57586	1.0699	0.484834	-1.15544	-0.714341	1.86421	0.126036	0.357234	0.421034	0.364302
	hsa-mir-3161	NA	NA	NA	NA	-0.389816	NA	1.24234	NA	0.426263	0.693562
	hsa-mir-17	1.45223	2.61526	0.100054	1.8944	-0.1078	-0.800044	0.0951206	0.756695	0.428374	0.107549
	hsa-mir-2355	-1.70895	-0.016132	0.874469	-0.630095	1.41541	1	1.61719	-0.243226	0.429169	0.497106
	hsa-mir-614	NA	NA	NA	NA	NA	NA	0.434986	NA	0.434986	NA
	hsa-mir-663b	NA	NA	NA	NA	NA	NA	0.434986	NA	0.434986	NA
	hsa-mir-3181	NA	-0.279166	NA	NA	NA	NA	0.434986	1.51457	0.434986	0.397376
	hsa-mir-219-2	2.80735	1.3058	0.321928	0.579668	-1.19717	-0.691878	-0.745586	0.790208	0.450798	0.417723
	hsa-mir-1180	NA	-0.0421272	1	0.45344	-2.97478	1.22239	0.827304	-0.359896	0.45344	0.974542
	hsa-mir-940	-2.32193	0.808296	0.263034	1.10571	-0.524301	1.58496	0.651304	-0.163499	0.457169	0.695089
	hsa-mir-643	NA	1.4578	0.459432	0.749593	-0.0749428	1.41504	-0.565014	0.0995357	0.459432	0.127677
	hsa-mir-107	-1.09606	1.84585	0.876581	0.258989	0.8843	-0.248017	0.664211	-0.701251	0.4616	0.390515
	hsa-mir-345	-2.68101	0.528188	0.879706	1.28143	0.27507	1.92283	0.399339	-0.172865	0.463764	0.54957
	hsa-mir-548j	0	0.398905	2.20945	0.532295	1.21426	0.63743	-0.301979	-0.450661	0.4656	0.127162
	hsa-mir-188	3.84629	0.342322	-0.172467	1.23207	-0.415878	-1.93056	1.20927	0.603699	0.47301	0.350115
	hsa-mir-2116	0.678072	NA	NA	0.280108	-1.38982	1.41504	-0.565014	1.51457	0.47909	0.518535
	hsa-mir-29a	1.37457	1.58539	0.487657	0.702264	0.474575	-0.116202	-0.594364	0.233046	0.481116	0.0812094
	hsa-mir-19a	3.03171	2.3838	0.341037	1.63766	0.387791	-3.03427	-0.900617	0.614109	0.50095	0.437803
	hsa-mir-92b	0.295456	1.16506	1.26136	-0.758428	-1.13791	1.11932	0.708873	-0.783288	0.502165	0.524865
	hsa-mir-324	-0.412292	-0.0070869	-1.2303	2.76588	1.10146	1.2932	0.342957	0.683667	0.513312	0.226161
	hsa-mir-98	1.87093	-0.392175	1.12228	0.536761	0.759373	-0.912633	0.490979	-0.957265	0.51387	0.402082
	hsa-mir-93	1.73897	1.02731	-0.666221	1.87507	-0.703141	-0.942391	0.378824	0.649838	0.514331	0.319035
	hsa-mir-124-3	NA	NA	NA	NA	NA	NA	NA	0.514573	0.514573	NA
	hsa-mir-1281	NA	NA	NA	NA	NA	NA	NA	0.514573	0.514573	NA
	hsa-mir-3178	NA	NA	NA	NA	NA	NA	NA	0.514573	0.514573	NA
	hsa-mir-3195	NA	NA	NA	NA	NA	NA	NA	0.514573	0.514573	NA
	hsa-mir-548u	NA	NA	NA	NA	NA	NA	NA	0.514573	0.514573	NA
	hsa-mir-3128	NA	3.8083	NA	-0.719892	2.19515	NA	-0.565014	0.514573	0.514573	0.292661
	hsa-mir-3149	NA	NA	NA	0.280108	NA	NA	1.43499	0.514573	0.514573	0.169473
	hsa-mir-1260b	NA	0.720834	NA	-1.71989	0.517074	NA	0.171952	3.32193	0.517074	0.496424
	hsa-mir-1185-2	NA	NA	1.77761	1.08746	-0.264285	-0.0489096	1.17195	-0.185867	0.519277	0.155623
	hsa-mir-3124	NA	2.62772	1	-0.304855	0.610184	NA	0.434986	0.0995357	0.522585	0.134995
	hsa-mir-1247	-4.20457	0.0618705	-1.77761	1.00803	1.10388	-2.49185	1.49783	1.75064	0.534949	0.63661
	hsa-mir-29b-1	3.28293	1.04276	0.893085	0.978079	-0.563846	-0.777608	-0.429359	0.186999	0.540042	0.254771
	hsa-mir-886	NA	NA	5.75489	0.543142	0.387791	NA	0.799983	-0.250962	0.543142	0.255347
	hsa-mir-548s	0.485427	1.72083	NA	0.543142	0.195146	2.32193	-0.787406	0.929611	0.543142	0.0915624
	hsa-mir-1248	1.90046	1.72083	0.584963	-0.272433	0.509255	-0.921997	-0.324006	2.96388	0.547109	0.14355
	hsa-mir-889	0.860837	0.239562	-1	0.910829	-0.413748	0.889109	1.42529	-2.85889	0.5502	0.989723
	hsa-mir-577	2.53222	2.27778	0.519374	0.050502	-3.48596	0.751104	0.607193	-0.337996	0.563284	0.595316
	hsa-mir-600	-0.321928	NA	NA	0.695145	0.873218	0	0.434986	2.25154	0.565066	0.133731
	hsa-mir-2276	NA	-0.279166	NA	5.08746	-0.711744	1.41504	-0.565014	2.09954	0.567936	0.253985
	hsa-mir-424	1.46097	0.325292	-0.386796	2.16617	0.818086	-1.70359	1.07123	0.0590792	0.571689	0.296601
	hsa-mir-3121	NA	-1.27917	1.58496	0.642678	NA	1.41504	-0.395089	0.514573	0.578626	0.395675
	hsa-mir-296	NA	-0.641737	NA	1.57256	-0.644389	NA	1.48229	0.581687	0.581687	0.388499
	hsa-mir-548t	0.678072	-1.18606	1.22239	-0.790281	-3.58621	0.485427	1.37359	1.79021	0.581749	0.998032
	hsa-mir-2115	NA	NA	NA	NA	-0.804854	0.584963	2.18987	NA	0.584963	0.527142
	hsa-mir-190b	NA	0.305796	1.58496	0.602036	0.972754	1.22239	0.499117	-0.122857	0.602036	0.0162485
	hsa-mir-483	-1.12928	-1.39464	3.24793	0.302418	5.53702	1.49304	0.902765	-3.51291	0.602592	0.51859
	hsa-mir-1250	NA	0.943226	2.58496	0	-0.29028	2.22239	0.604911	-1.29278	0.604911	0.238158
	hsa-let-7d	1.60418	-0.276513	1.14451	0.0114198	0.897709	1.49334	0.328561	-0.261208	0.613135	0.0568246
	hsa-mir-935	-0.321928	0.720834	-2	0.511433	-0.423763	1.32193	1.93249	4.84847	0.616134	0.287124
	hsa-mir-92a-1	0.232272	0.842824	1.08641	0.830701	0.412971	-0.547345	-0.351748	0.901481	0.621836	0.0880899
	hsa-mir-3125	NA	NA	0	1.28011	NA	NA	NA	NA	0.640054	0.5
	hsa-mir-3136	1	1.09935	0.584963	0.695145	1.19515	-0.263034	-0.565014	-0.263034	0.640054	0.120672
	hsa-mir-708	-0.17397	1.16141	-0.725378	1.5835	-0.434302	2.25382	0.873334	0.429288	0.651311	0.134501
	hsa-mir-181b-2	-1.152	2.3058	1.76768	-0.379836	1.08371	0.235059	2.1895	-1.49967	0.659385	0.316882
	hsa-mir-1185-1	0.678072	1.20626	0.152003	2.13021	0.440259	0.360295	0.934557	0.643856	0.660964	0.00761077
	hsa-mir-1308	NA	NA	0.584963	NA	NA	0.762961	0.879771	0.514573	0.673962	0.00374212
	hsa-mir-20a	4.34297	1.64511	0.0352971	2.01355	-0.181036	-2.1527	0.163484	1.20131	0.682396	0.231908
	hsa-mir-1266	0.137504	NA	1.58496	0.602036	0.780109	NA	-0.828048	3.09954	0.691072	0.162364
	hsa-mir-223	0.169731	-2.17761	1.79959	1.21884	-0.663058	1.8886	1.23087	-0.586904	0.694285	0.499603
	hsa-mir-3185	NA	NA	NA	0.695145	NA	NA	NA	NA	0.695145	NA
	hsa-mir-181b-1	-0.428843	0.305796	2.04731	0.198971	1.06714	2.96963	1.32554	0.341242	0.70419	0.0419207
	hsa-let-7a-1	0.693022	-0.890971	0.889817	-0.500068	1.65051	0.90414	-0.304538	0.718034	0.705528	0.236713
	hsa-mir-27b	0.2983	0.953481	1.72366	-0.762018	-0.556504	2.08106	0.460369	1.34469	0.706925	0.0977629
	hsa-mir-1252	-0.321928	0.720834	NA	NA	NA	NA	2.43499	NA	0.720834	0.360821
	hsa-mir-3146	NA	0.720834	NA	1.39559	-0.126782	-0.584963	NA	1.25154	0.720834	0.240814
	hsa-mir-1908	NA	NA	-1	2.45003	NA	NA	NA	NA	0.725016	0.746702
	hsa-mir-301b	NA	1.72083	NA	2.39559	-2.05278	-0.893085	1.46741	0	0.733704	0.557582
	hsa-mir-509-3	NA	0.528188	0	-0.719892	0.735715	3.1964	5.12615	4.5065	0.735715	0.0731953
	hsa-mir-3174	NA	NA	0.415037	1.1426	0.288256	1.05889	2.09795	0.308122	0.736966	0.0274679
	hsa-mir-632	NA	-1.27917	NA	0.280108	0.972754	NA	0.756914	1.36257	0.756914	0.413363
	hsa-mir-3144	0.263034	NA	NA	-0.719892	1.19515	NA	0.756914	5.48036	0.756914	0.262201
	hsa-mir-24-2	0.868755	0.872837	0.884523	-0.260076	0.326269	1.59465	0.200839	0.656035	0.762395	0.0138766
	hsa-mir-552	-1.90689	2.45658	0.635086	0.891752	-2.03459	-3.20511	5.74017	2.994	0.763419	0.533449
	hsa-mir-181a-1	-2.36702	0.813483	0.714091	0.238989	1.01084	1.62709	-0.188224	0.983676	0.763787	0.440431
	hsa-mir-494	2.21412	-0.501559	0.0627358	1.3356	0.195146	1.38827	1.33652	-1.39232	0.765375	0.21121
	hsa-mir-602	NA	NA	NA	NA	NA	NA	-0.565014	2.09954	0.767261	0.667358
	hsa-mir-331	-1.16439	1.39633	-1.21818	0.784313	0.296665	1.50879	0.784838	1.42502	0.784576	0.263213
	hsa-mir-1259	2.21412	2.00624	0.192645	0.195496	-0.299618	0.268035	1.31527	2.16971	0.791654	0.0281857
	hsa-mir-501	1.45768	-0.016132	0.827163	0.821569	0.088757	0.753517	0.990633	0.87326	0.824366	0.00365018
	hsa-mir-210	1.79141	-0.942131	-0.109813	1.43489	0.0424684	0.243786	1.62222	3.32011	0.83934	0.0965928
	hsa-mir-3074	2.23607	0.774472	1.35428	-0.652864	-1.47371	1.08331	0.0905844	0.940109	0.85729	0.233097
	hsa-mir-1293	NA	NA	NA	1.28011	NA	NA	0.434986	NA	0.857547	0.291467
	hsa-mir-4325	NA	NA	NA	1.28011	NA	NA	0.434986	NA	0.857547	0.291467
	hsa-mir-599	NA	NA	NA	0.86507	2.34199	0.736966	-1.07521	3.4842	0.86507	0.176277
	hsa-mir-449a	NA	1.13587	NA	0.86507	0.195146	NA	0.0199488	1.73697	0.86507	0.0653701
	hsa-mir-449c	NA	NA	NA	0.142604	-0.29028	2.16993	0.867946	3.07257	0.867946	0.130549
	hsa-mir-421	2.17671	2.07537	0.9187	0.82184	0.618983	0.0683588	1.23294	0.698998	0.87027	0.00406939
	hsa-mir-193a	2.06828	-1.12631	0.838249	-1.44275	0.902507	-0.834721	1.01231	1.0633	0.870378	0.510901
	hsa-mir-1245	1	1.3058	NA	0.0874628	0.915038	0.874469	0.63662	-2.70782	0.874469	0.583902
	hsa-mir-92a-2	0.900464	1.72083	1.21632	0.935706	-0.6871	-0.786596	-0.797272	1.32193	0.918085	0.240301
	hsa-mir-1276	0.263034	3.52819	1.58496	1.39559	-1.61221	3	-0.149976	0.514573	0.955079	0.116101
	hsa-mir-181a-2	-1.58496	1.44947	0.33542	0.528487	2.16293	1.04764	0.874518	1.86721	0.961079	0.0816042
	hsa-mir-335	2.52645	1.10699	-1.84327	0.844078	1.09628	-0.623115	0.309268	1.1359	0.970178	0.260527
	hsa-mir-3143	1.37851	NA	NA	0.810623	-0.804854	1.45943	1.13543	-1.29278	0.973024	0.399406
	hsa-mir-939	NA	NA	NA	NA	NA	NA	0.434986	1.51457	0.97478	0.321954
	hsa-mir-1201	NA	NA	NA	0.280108	0.70972	NA	1.28298	1.51457	0.996351	0.042771
	hsa-mir-452	1.68313	0.93358	0.440902	1.37727	-0.612101	1.05976	0.480138	1.50267	0.996672	0.0139437
	hsa-mir-510	NA	NA	NA	NA	NA	NA	1.01995	NA	1.01995	NA
	hsa-mir-516b-2	NA	NA	NA	NA	NA	NA	1.01995	NA	1.01995	NA
	hsa-mir-519d	NA	NA	NA	NA	NA	NA	1.01995	NA	1.01995	NA
	hsa-mir-21	1.96107	0.244357	-0.272152	1.21852	1.78788	0.828825	0.392486	1.9714	1.02367	0.0120599
	hsa-mir-597	NA	NA	NA	1.65862	-0.612209	1	1.17195	1.02915	1.02915	0.0914373
	hsa-mir-663	NA	1.3058	1.32193	1.82068	0.780109	NA	0.113058	0.777608	1.04295	0.00833343
	hsa-mir-665	1.80735	NA	1.80735	1.04564	1.58217	-0.658963	-0.243086	-1.29278	1.04564	0.279799
	hsa-mir-27a	2.51836	0.845336	-0.439191	0.773678	-0.861771	1.26529	1.30088	2.13945	1.05531	0.0544207
	hsa-mir-455	-0.611435	1.0766	1.37851	1.06982	2.02865	1.66174	0.134106	-0.147622	1.07321	0.040802
	hsa-mir-520a	NA	NA	NA	NA	NA	-0.263034	2.43499	NA	1.08598	0.568504
	hsa-mir-450b	NA	0.961842	0.736966	2.47275	1.25173	1.66297	1.08706	0.145339	1.08706	0.00518369
	hsa-mir-611	NA	NA	NA	NA	NA	NA	NA	1.09954	1.09954	NA
	hsa-mir-542	1.926	1.14852	0.330645	3.70797	1.05337	-1.08854	1.43499	0.418358	1.10094	0.0567634
	hsa-mir-3193	NA	3.13587	NA	0.280108	NA	NA	-1.88694	1.92961	1.10486	0.484847
	hsa-mir-2278	NA	NA	-0.584963	3.08746	1.19515	-0.584963	1.01995	1.51457	1.10755	0.158157
	hsa-mir-877	2.76553	-0.0312389	1.152	1.93109	0.0719981	1.36804	1.10198	-1.1375	1.12699	0.0763345
	hsa-mir-1304	-1.32193	NA	2	1.28011	0.112684	2.54432	0.113058	1.13906	1.13906	0.140918
	hsa-mir-491	2.848	1.72083	0.152003	1.4004	-0.295179	0.584963	0.914979	2.12928	1.15769	0.0152516
	hsa-mir-323b	NA	0.913479	1.16993	0.134257	1.51707	NA	2.34188	NA	1.16993	0.0283971
	hsa-mir-3177	NA	NA	NA	2.28011	NA	NA	1.17195	-0.485427	1.17195	0.343563
	hsa-mir-1225	NA	NA	NA	NA	1.19515	NA	NA	NA	1.19515	NA
	hsa-mir-1297	NA	NA	NA	NA	1.19515	NA	NA	NA	1.19515	NA
	hsa-mir-545	NA	NA	NA	NA	1.19515	NA	NA	NA	1.19515	NA
	hsa-mir-466	NA	NA	NA	3.08746	1.19515	-1.16993	NA	NA	1.19515	0.488199
	hsa-mir-450a-1	1.26303	NA	NA	3.45003	3.0025	-0.263034	1.14548	0.514573	1.20426	0.0488623
	hsa-mir-1323	NA	2.52819	NA	1.19765	0.458181	NA	1.21259	1.51457	1.21259	0.0145724
	hsa-mir-4286	-2.32193	NA	1.58496	-0.304855	2.57366	1.22239	-0.565014	3.09954	1.22239	0.337198
	hsa-mir-1292	NA	2.72083	2	1.61026	0.0431433	NA	0.839377	-1.01594	1.22482	0.123234
	hsa-mir-217	-1.09954	1.3058	0.321928	2.87648	2.36964	1.71882	1.08135	1.23806	1.27193	0.0254464
	hsa-mir-1288	NA	NA	NA	1.28011	NA	NA	NA	NA	1.28011	NA
	hsa-mir-3122	NA	1.3058	NA	NA	NA	NA	NA	NA	1.3058	NA
	hsa-mir-95	1.26303	3.50901	1.5025	0.214575	-0.646672	5.17374	2.50302	-0.681659	1.38277	0.0628052
	hsa-mir-3117	NA	2.98387	0.917538	2.41476	1.31062	1.44805	1.40544	1.03814	1.40544	0.00125128
	hsa-mir-4326	NA	NA	-1	3.98055	NA	-0.263034	1.43499	2.51457	1.43499	0.21494
	hsa-mir-513c	NA	NA	NA	NA	NA	NA	1.49388	NA	1.49388	NA
	hsa-mir-1246	4.57289	NA	0	-0.0418202	-1.18337	2.83007	1.50347	3.01707	1.50347	0.0966457
	hsa-mir-1909	NA	NA	NA	NA	NA	NA	NA	1.51457	1.51457	NA
	hsa-mir-3170	NA	NA	1.58496	0.0874628	1.78011	-1.58496	NA	2.09954	1.58496	0.312909
	hsa-mir-503	NA	2.8628	1.10434	2.83752	1.59386	1.12302	2.20693	-0.179553	1.59386	0.00705536
	hsa-mir-1286	NA	1.5953	1.32193	2.86507	2.19515	NA	1.60491	0.0995357	1.60011	0.00793089
	hsa-mir-3162	NA	-0.279166	2.58496	NA	NA	NA	1.60491	NA	1.60491	0.26104
	hsa-mir-449b	NA	NA	1.58496	NA	0.195146	NA	1.67599	2	1.63048	0.042063
	hsa-mir-224	2.11366	1.01723	1.84444	1.82833	-0.709276	1.48369	1.342	3.4435	1.65601	0.00715284
	hsa-mir-122	4.33151	-1.08652	1.63559	1.69894	11.5287	0.248107	1.19884	2.14033	1.66726	0.0889201
	hsa-mir-493	1.58496	0.193903	1.96963	1.90674	0.0295603	3.32193	2.1477	-0.900464	1.74585	0.0343055
	hsa-mir-3159	NA	NA	NA	2.45003	1.78011	NA	NA	0.514573	1.78011	0.108236
	hsa-mir-450a-2	NA	1.83631	1	2.12338	2.55972	1.8413	1.49388	-0.359896	1.83631	0.00593253
	hsa-mir-584	0.263034	3.8049	3.24548	1.56081	-0.162406	2.22707	1.67406	2.65364	1.95056	0.00568498
	hsa-mir-3175	NA	NA	NA	1.86507	NA	NA	NA	2.09954	1.9823	0.0376056
	hsa-mir-1228	NA	NA	NA	NA	2.78011	NA	1.24234	NA	2.01123	0.232463
	hsa-mir-3187	NA	2.3058	NA	1.86507	NA	NA	NA	NA	2.08543	0.0670214
	hsa-mir-549	NA	NA	NA	NA	2.19515	NA	NA	NA	2.19515	NA
	hsa-mir-182	5.33628	2.92616	1.32193	2.63766	-0.652851	0.955606	2.10741	4.14821	2.37254	0.00948477
	hsa-mir-3153	NA	NA	NA	2.45003	NA	NA	NA	NA	2.45003	NA
	hsa-mir-508	NA	-1.27917	-1.58496	NA	1.19515	3.73697	4.69551	7.02237	2.46606	0.162928
	hsa-mir-96	3.5509	2.79828	1.21057	2.98536	-0.0953688	0.415037	2.28606	3.44826	2.54217	0.00404066
	hsa-mir-183	3.80993	3.06618	1.88264	3.3791	-0.103512	1.58887	2.79559	3.64719	2.93089	0.00103765
	hsa-mir-513b	NA	NA	NA	NA	NA	NA	3.52245	NA	3.52245	NA
	hsa-mir-1269	-0.321928	8.14519	5.64386	NA	2.06962	NA	5.88894	-3.39232	3.85674	0.151274
	hsa-mir-211	NA	NA	NA	NA	4.19515	NA	NA	NA	4.19515	NA
	hsa-mir-135b	7.07895	4.78333	4.01282	3.77653	1.77534	3.00681	5.21343	5.96829	4.39808	0.000138627
	hsa-mir-506	NA	NA	NA	NA	NA	NA	NA	4.8365	4.8365	NA
	hsa-mir-31	3.88567	7.09745	6.72451	1.42623	1.26699	6.02448	1.79967	9.39335	4.95507	0.00332343
	hsa-mir-675	NA	7.90571	NA	5.97534	5.58746	NA	NA	NA	5.97534	0.0119849

## Sheet: Table S6B
	Table S6B Complete lists of miRNAs detected in N/M Analysis of 8 colorectal cancer patients using NGS technology delivered a range of malign tissue specific deregulated miRNAs.
	ID	P1	P2	P3	P4	P5	P6	P7	P8	median log2ratio	p-values
	hsa-mir-875	NA	NA	NA	NA	NA	NA	8.53802	NA	8.53802	NA
	hsa-mir-122	11.1223	-1.60131	11.5838	13.9826	4.07812	-4.70657	-0.168526	11.0263	7.55219	0.0605042
	hsa-mir-1252	NA	NA	NA	NA	NA	NA	5.48169	NA	5.48169	NA
	hsa-mir-135b	8.34899	1.71008	2.68206	5.95195	4.75507	0.878499	5.82343	4.91002	4.83255	0.00156307
	hsa-mir-3186	NA	NA	NA	NA	NA	NA	4.74473	NA	4.74473	NA
	hsa-mir-549	NA	NA	NA	NA	4.35191	NA	NA	NA	4.35191	NA
	hsa-mir-1246	3.96522	NA	-3.80979	6.36787	1.67384	1.43706	5.54784	8.93664	3.96522	0.0702838
	hsa-mir-3144	1.51519	NA	NA	NA	NA	NA	4.19929	3.79442	3.79442	0.06298
	hsa-mir-466	NA	NA	NA	4.32811	3.15927	-1.82597	NA	NA	3.15927	0.422615
	hsa-mir-449c	NA	NA	NA	-0.0488578	-0.396547	3.21842	3.2924	3.02975	3.02975	0.0953051
	hsa-mir-183	5.6151	-0.642433	2.99757	5.40144	2.06045	1.37413	4.19079	1.80177	2.52901	0.007022
	hsa-mir-615	NA	NA	NA	NA	1.35191	NA	3.69028	NA	2.5211	0.276444
	hsa-mir-31	2.17661	2.50441	9.22899	-0.475958	2.45496	5.24442	2.02463	5.34967	2.47968	0.0112532
	hsa-mir-1286	NA	NA	-0.00243493	3.048	2.35191	NA	3.15977	0.169925	2.35191	0.0654236
	hsa-mir-1201	NA	NA	2.31949	4.32811	0.129521	NA	-2.33209	3.16993	2.31949	0.267607
	hsa-mir-516b-2	NA	NA	NA	NA	NA	NA	2.31177	NA	2.31177	NA
	hsa-mir-449b	NA	1.59461	2.31949	NA	0.258804	NA	3.90545	2.30743	2.30743	0.0246134
	hsa-mir-184	3.04769	-0.990356	4.61227	0.825611	1.54456	5.78579	3.01959	-0.234465	2.28207	0.0326927
	hsa-mir-96	5.04412	0.650101	0.89065	3.51799	1.98447	-0.258252	3.44118	2.49185	2.23816	0.00909135
	hsa-mir-675	NA	-0.990356	NA	3.60697	1.00399	NA	NA	3.39232	2.19815	0.205555
	hsa-mir-3161	NA	NA	NA	NA	0.766951	NA	3.5748	NA	2.17088	0.365457
	hsa-mir-4326	NA	NA	NA	4.76421	1.35191	-0.241008	2.79719	2.16993	2.16993	0.0582414
	hsa-mir-182	6.1278	-3.99934	1.42383	5.5938	2.13619	0.501194	3.46557	2.16993	2.15306	0.093395
	hsa-mir-95	2.56582	0.114826	1.9204	0.816089	2.3719	5.92949	2.63639	0.446535	2.14615	0.0143479
	hsa-mir-584	1.81337	0.65119	0.0877629	3.15968	2.08536	2.35267	2.20502	3.83289	2.14519	0.00221111
	hsa-mir-1248	1.18896	3.00964	2.16749	3.79803	0.568725	-0.688467	1.9398	3.66588	2.05364	0.00930813
	hsa-mir-663	NA	-0.990356	2.16749	1.93096	0.887967	NA	2.21811	3.2854	2.04923	0.0465151
	hsa-mir-493	2.63857	-1.24909	0.734531	1.87751	2.17655	3.88277	2.25954	1.84452	2.02703	0.0125819
	hsa-mir-3162	NA	NA	-0.00243493	NA	NA	NA	1.98984	2.16993	1.98984	0.184745
	hsa-mir-663b	NA	NA	NA	NA	NA	NA	0.98984	2.90689	1.94837	0.291061
	hsa-mir-1243	NA	NA	NA	NA	1.93688	NA	NA	NA	1.93688	NA
	hsa-mir-450b	NA	-0.449788	1.87203	2.56258	1.91751	2.10949	2.15518	1.35869	1.91751	0.00462846
	hsa-mir-19b-1	2.83712	NA	NA	3.70008	0.181989	-4.32847	0.98984	3.39232	1.91348	0.400687
	hsa-mir-937	0.515192	NA	NA	3.24065	NA	NA	NA	NA	1.87792	0.399631
	hsa-mir-1975	3.57316	-0.264531	-0.747862	2.10544	0.537951	1.60168	4.39972	4.47163	1.85356	0.0302663
	hsa-mir-3177	NA	NA	NA	1.82561	NA	NA	3.53416	1.16993	1.82561	0.0907762
	hsa-mir-1323	NA	NA	NA	0.771164	2.83734	NA	4.15403	0.584963	1.80425	0.0930184
	hsa-mir-224	2.04506	1.9024	2.02178	2.29541	1.57794	1.3545	1.06314	1.63209	1.76725	5.98655e-06
	hsa-mir-1259	1.37459	1.53321	1.27767	6.16388	1.97263	-2.75558	3.46665	4.08071	1.75292	0.0530069
	hsa-mir-509-3	NA	-0.990356	1.99757	-1.34431	1.79937	4.26361	1.72681	0.0630098	1.72681	0.197939
	hsa-mir-3185	NA	NA	NA	1.65569	NA	NA	NA	NA	1.65569	NA
	hsa-mir-3117	NA	1.59461	1.58253	2.03902	2.42992	-2.0699	0.102315	2.04439	1.59461	0.115021
	hsa-mir-2115	NA	NA	NA	NA	2.2588	NA	-0.425197	1.58496	1.58496	0.293076
	hsa-mir-3122	NA	NA	NA	NA	1.93688	NA	1.5748	1.58496	1.58496	0.00487341
	hsa-mir-3195	NA	NA	NA	-1.34431	1.93688	NA	NA	1.58496	1.58496	0.557468
	hsa-mir-506	NA	NA	NA	NA	NA	NA	NA	1.58496	1.58496	NA
	hsa-mir-519c	NA	NA	NA	NA	NA	NA	1.5748	NA	1.5748	NA
	hsa-mir-21	1.45881	1.55156	0.0582582	2.30554	1.76107	0.509127	0.520994	1.83522	1.50519	0.00285358
	hsa-mir-542	3.76673	1.00964	0.412603	3.64275	0.779335	-1.07567	2.05461	1.99709	1.50337	0.030014
	hsa-mir-4286	1.51519	NA	-0.00243493	1.46304	1.48942	-0.241008	0.726806	1.58496	1.46304	0.0193888
	hsa-mir-885	NA	NA	NA	1.46304	-1.45544	NA	1.44927	3.45286	1.45616	0.311403
	hsa-mir-223	-0.329811	0.93461	-2.35495	2.95289	2.33026	1.97005	-1.67296	3.3365	1.45233	0.275139
	hsa-mir-181a-2	-2.23171	-0.39786	2.20046	2.8043	1.7327	1.57787	1.15757	0.675915	1.36772	0.141941
	hsa-mir-3125	NA	NA	NA	NA	1.35191	NA	NA	NA	1.35191	NA
	hsa-mir-518c	NA	NA	NA	NA	1.35191	NA	NA	NA	1.35191	NA
	hsa-mir-545	NA	NA	NA	NA	1.35191	NA	NA	NA	1.35191	NA
	hsa-mir-508	NA	-0.990356	-1.5874	NA	3.81135	3.29504	-0.595122	3.2854	1.34514	0.292161
	hsa-mir-181b-2	0.380262	7.63657	1.52667	-0.768205	-0.168891	2.46226	2.32801	1.09785	1.31226	0.0907784
	hsa-mir-503	NA	-0.379398	1.30013	1.15367	1.09813	1.71319	3.04724	1.42559	1.30013	0.0127558
	hsa-mir-599	NA	NA	0.319493	-0.0812792	0.129521	2.24442	9.86597	2.58496	1.28196	0.164515
	hsa-mir-216b	-4.61409	NA	NA	2.32811	2.55355	1.34395	-0.688232	1.16993	1.25694	0.763469
	hsa-mir-1229	NA	NA	NA	1.24065	NA	NA	NA	NA	1.24065	NA
	hsa-mir-1288	NA	NA	NA	1.24065	NA	NA	NA	NA	1.24065	NA
	hsa-mir-877	4.15905	0.179569	1.26505	1.18657	0.684296	2.5015	1.986	-0.933363	1.22581	0.0394443
	hsa-mir-1276	1.40828	1.00964	1.58253	-0.759351	-1.45544	2.60699	1.5748	-0.152003	1.20896	0.179051
	hsa-mir-708	-2.47659	5.02884	0.0657366	0.622698	2.18954	2.29048	-1.398	1.73391	1.1783	0.265045
	hsa-mir-1292	NA	NA	1.99757	1.17746	0.837341	NA	1.36181	-0.0280144	1.17746	0.0325398
	hsa-mir-181d	1.44067	1.12195	3.01843	1.06183	0.733526	1.22049	1.97536	0.274532	1.17122	0.00249259
	hsa-mir-190b	NA	NA	-0.850432	1.41057	1.245	1.43706	-1.46959	1.02554	1.13527	0.414164
	hsa-mir-886	NA	NA	4.24549	1.08865	1.12952	NA	-1.2472	2.27886	1.12952	0.169024
	hsa-mir-27a	3.02651	-1.44647	-0.408289	0.878173	1.32438	0.923659	1.62644	1.56746	1.12402	0.0918351
	hsa-mir-653	NA	1.59461	NA	-3.21878	0.64142	3.02203	3.31177	0.584963	1.11801	0.351868
	hsa-mir-146b	1.74464	1.11705	-3.05327	1.39667	1.03399	-1.22613	-0.539593	3.65502	1.07552	0.501179
	hsa-mir-1260b	NA	NA	NA	-0.174389	0.936876	NA	1.21223	1.58496	1.07455	0.100372
	hsa-mir-423	2.05399	-1.26306	1.45345	-0.348062	-0.118594	2.75095	2.2152	0.695627	1.07454	0.106281
	hsa-mir-3163	NA	NA	NA	0.240649	NA	NA	NA	1.90689	1.07377	0.420081
	hsa-mir-181a-1	-1.44417	0.96479	1.88815	1.17603	0.591693	4.88497	-0.892104	1.47035	1.07041	0.15565
	hsa-mir-1250	NA	0.00964383	2.80492	0.908074	1.06812	3.50315	3.38216	0.36257	1.06812	0.0212619
	hsa-mir-1247	0.71089	-2.89725	-1.78004	1.42387	1.81386	1.66203	4.48125	0.468149	1.06738	0.390339
	hsa-mir-24-2	1.41789	0.875343	1.23572	1.32587	1.5109	0.619082	-0.921109	-0.341632	1.05553	0.0581737
	hsa-mir-450a-1	-0.292163	NA	0.997565	3.24065	1.73043	-1.56294	1.05397	2.04439	1.05397	0.134181
	hsa-mir-2355	-0.987309	1.85764	0.956923	0.612016	1.45244	1.15223	1.13489	0.645717	1.04591	0.024879
	hsa-mir-1826	-0.461548	-2.66895	0.471496	1.19174	2.38534	0.873704	1.19929	2.80128	1.03272	0.270631
	hsa-mir-450a-2	NA	1.00964	1.99757	0.676748	1.00727	1.8121	2.3745	0.797956	1.00964	0.00153509
	hsa-mir-758	NA	NA	-1.5874	1.95686	1.00399	-0.755581	3.15977	NA	1.00399	0.433042
	hsa-mir-149	2.43576	NA	0.997565	1.07715	-3.10752	-0.977974	2.98984	-0.415037	0.997565	0.609143
	hsa-mir-153-1	NA	NA	NA	NA	NA	NA	0.98984	NA	0.98984	NA
	hsa-mir-3175	NA	NA	NA	0.825611	NA	NA	0.98984	2.16993	0.98984	0.0883266
	hsa-mir-519d	NA	NA	NA	NA	NA	NA	0.98984	NA	0.98984	NA
	hsa-mir-216a	-2.29216	NA	NA	3.048	1.35191	1.43706	-0.01016	0.584963	0.968438	0.389622
	hsa-mir-3124	NA	1.33157	2.16749	-1.34431	NA	NA	NA	0.584963	0.958267	0.428272
	hsa-mir-744	2.08587	-1.87666	2.14185	0.0405594	-1.11956	3.01449	1.82376	-0.0606628	0.932161	0.262392
	hsa-mir-1293	NA	NA	NA	0.240649	NA	NA	1.5748	NA	0.907726	0.403464
	hsa-mir-431	NA	-0.990356	-2.00243	1.048	1.21441	0.896495	3.5748	0.0995357	0.896495	0.446397
	hsa-mir-34a	3.58803	-0.25746	0.903698	1.09372	0.860474	-1.34275	-2.1242	2.67446	0.882086	0.351015
	hsa-mir-1308	NA	NA	NA	NA	2.59984	-2.56294	-0.858157	2.90689	0.870842	0.722442
	hsa-mir-548s	-1.7072	1.00964	-0.587397	0.726076	1.67384	1.82938	-2.81751	1.41504	0.86786	0.759916
	hsa-mir-27b	2.11789	-0.635012	1.78984	-1.50308	0.229527	1.50306	1.63133	-0.170246	0.866292	0.226725
	hsa-mir-148b	2.30578	-0.422977	0.734531	0.990328	-0.821165	2.91469	1.02119	0.646664	0.86243	0.0747679
	hsa-mir-1185-1	-0.707201	1.14715	-0.757322	0.923459	0.891647	-1.81374	1.34131	0.83289	0.862269	0.588244
	hsa-mir-940	2.32255	1.46908	-0.739401	1.86321	0.359448	1.34395	0.224305	-0.0931094	0.851701	0.0591312
	hsa-mir-345	-0.955638	3.16615	1.62797	0.912426	0.770599	1.7821	0.112036	-0.965949	0.841512	0.150102
	hsa-mir-335	2.36385	-0.329918	0.361448	1.41542	0.534135	0.403482	1.46199	1.14436	0.839248	0.0176214
	hsa-mir-618	NA	-0.990356	0.219957	4.2704	0.351914	0.829381	4.58678	1.75489	0.829381	0.0963573
	hsa-mir-1193	NA	NA	NA	0.825611	1.35191	NA	NA	0.263034	0.825611	0.122503
	hsa-mir-3159	NA	NA	NA	0.825611	0.351914	NA	NA	1.80735	0.825611	0.145992
	hsa-mir-331	0.035303	0.898283	0.118871	0.595546	0.993307	1.60056	1.02122	0.746286	0.822284	0.00415331
	hsa-mir-7-2	-0.591724	0.424681	-0.265469	1.71458	0.699837	1.02203	3.01732	0.932886	0.816361	0.0668352
	hsa-mir-532	0.702015	0.92817	1.01845	-0.426954	1.1841	1.98832	-1.24991	0.0263194	0.815092	0.192481
	hsa-mir-421	1.55826	1.05029	0.267172	1.26702	0.548165	-0.1135	1.71032	0.30544	0.799225	0.0100017
	hsa-let-7a-3	0.569639	1.02826	1.44981	0.0294974	1.39085	1.61215	-0.284191	-0.152003	0.798949	0.0357002
	hsa-mir-212	0.0770706	1.62435	0.936165	0.0886458	0.00083939	0.999306	1.46199	0.656753	0.796459	0.0140029
	hsa-mir-935	-2.7072	0.00964383	-2.00243	1.57507	-1.75242	2.00692	2.29469	3.02237	0.792356	0.708666
	hsa-mir-596	NA	NA	NA	NA	NA	NA	-0.01016	1.58496	0.787401	0.504081
	hsa-mir-1185-2	NA	NA	0.649642	0.884505	1.14041	-1.71494	2.31177	0.469485	0.767073	0.298715
	hsa-mir-34c	0.375261	-1.1315	3.15039	0.852949	1.09103	2.04115	-1.86417	0.641365	0.747157	0.292912
	hsa-mir-496	0.0297649	-1.57532	-1.5874	2.7767	1.44502	-2.24101	4.15977	1.83289	0.737394	0.484044
	hsa-mir-2110	3.43576	-1.27046	1.74889	-2.44842	-1.80189	4.5482	3.00921	-0.275313	0.736787	0.3865
	hsa-mir-500b	-1.48481	0.00964383	0.734531	1.17353	0.825845	NA	-0.425197	1.51096	0.734531	0.426622
	hsa-mir-326	0.515192	1.817	0.123096	2.35995	-1.06312	0.948026	1.18249	-0.862496	0.731609	0.18441
	hsa-mir-1295	0.292799	-0.990356	2.99757	4.5982	-1.64809	NA	0.726806	5.16993	0.726806	0.168344
	hsa-mir-2278	NA	NA	-1.5874	2.56258	1.19991	0.244419	-0.595122	2.16993	0.722165	0.358109
	hsa-mir-98	1.81354	0.432688	0.800692	2.4107	0.62833	-2.29541	-0.660251	0.821312	0.714511	0.367896
	hsa-mir-1304	0.707837	NA	0.412603	0.925147	0.0399698	3.35593	0.837837	0.643856	0.707837	0.0524143
	hsa-mir-769	4.89766	0.179569	0.450077	2.35976	-0.455441	0.214671	1.72681	0.960472	0.705274	0.0707023
	hsa-mir-449a	NA	-0.575319	NA	0.70008	-1.64809	NA	3.26286	1.32193	0.70008	0.505648
	hsa-mir-501	0.260378	0.920376	0.469634	1.69618	1.09842	0.0941761	-1.22428	0.943649	0.695005	0.128712
	hsa-mir-203	2.61614	0.269587	-1.074	1.72684	1.74625	-0.730987	-2.74503	1.09866	0.684122	0.58288
	hsa-mir-181b-1	-0.145322	2.25757	0.997565	0.0986299	-0.288544	5.03698	0.359711	1.3489	0.678638	0.0943259
	hsa-mir-409	-1.69492	0.279251	-0.0175418	2.43192	1.54195	1.66107	0.617238	0.724956	0.671097	0.162988
	hsa-mir-516b-1	NA	NA	NA	NA	1.35191	NA	-0.01016	NA	0.670877	0.504784
	hsa-let-7i	0.705865	0.912957	0.632112	1.79144	0.257377	0.235452	-1.33659	1.80033	0.668988	0.119743
	hsa-mir-1269	-1.7072	0.637675	7.15527	NA	-3.97001	NA	8.40488	NA	0.637675	0.436621
	hsa-mir-3129	-1.80674	0.594606	1.21996	-0.38084	2.14709	-0.688467	0.98984	0.678072	0.636339	0.459415
	hsa-mir-339	0.687659	-0.800695	0.923564	-0.339058	-0.678783	0.943416	1.00208	0.584963	0.636311	0.319012
	hsa-mir-3140	-2.87713	0.594606	0.412603	0.70008	0.673842	1.21842	1.0773	0.0324215	0.634224	0.635551
	hsa-mir-19b-2	NA	1.59461	NA	3.41057	-0.326158	-4.04836	NA	NA	0.634224	0.927543
	hsa-mir-643	NA	0.746609	0.582528	1.15492	-1.09875	1.10949	0.633696	-0.830075	0.633696	0.378237
	hsa-mir-500	-0.132292	-0.547574	1.19021	1.32732	0.913692	0.350932	-1.9691	0.964896	0.632312	0.527389
	hsa-mir-651	-1.44417	1.24668	0.734531	0.647274	-0.648086	0	0.615444	1.20945	0.631359	0.403183
	hsa-mir-92a-1	1.93349	0.00964383	0.891335	1.20217	-1.27793	0.630348	0.629708	0.304226	0.630028	0.147323
	hsa-mir-494	0.84534	-1.62779	-1.49429	-0.158758	1.74352	0.38852	1.69643	1.25701	0.61693	0.504094
	hsa-mir-629	1.38244	-0.113504	-0.2369	1.19872	0.414802	3.20476	0.794078	0.436227	0.615153	0.0563517
	hsa-mir-1245	-0.122238	0.594606	NA	-0.536959	1.69072	-0.688467	0.667912	0.86507	0.594606	0.312869
	hsa-mir-2277	1.10015	-0.727322	-0.00243493	2.03206	-1.10752	2.39126	1.75537	0.0703893	0.585272	0.181866
	hsa-mir-1197	NA	1.59461	-0.00243493	1.24065	-0.0631237	-2.1479	2.5748	0.584963	0.584963	0.379558
	hsa-mir-1281	NA	NA	NA	NA	NA	NA	NA	0.584963	0.584963	NA
	hsa-mir-3170	NA	NA	2.58253	NA	-0.648086	-1.56294	1.31177	0.584963	0.584963	0.566374
	hsa-mir-3181	NA	0.594606	NA	NA	NA	NA	-1.01016	0.584963	0.584963	0.925339
	hsa-mir-548p	NA	NA	NA	NA	NA	NA	NA	0.584963	0.584963	NA
	hsa-mir-9-1	NA	NA	NA	NA	NA	NA	NA	0.584963	0.584963	NA
	hsa-mir-936	NA	NA	NA	NA	1.93688	NA	-0.01016	0.584963	0.584963	0.283293
	hsa-mir-671	0.468649	1.14715	-1.83251	1.4963	1.72167	-1.15958	-0.0242352	0.68012	0.574384	0.506255
	hsa-mir-539	-3.61409	2.00964	-2.0899	-1.29638	1.1579	0.244419	2.27306	0.884061	0.56424	0.943787
	hsa-mir-1301	2.16727	-0.846992	1.13507	-1.72921	-0.476718	4.94644	3.20294	-0.00911371	0.562977	0.231308
	hsa-mir-320b-2	1.10015	1.33157	3.08503	-1.19189	-0.847856	2.25626	0.023263	-1.87734	0.561709	0.458269
	hsa-mir-221	-1.26015	0.428625	0.0421227	1.17983	0.693003	0.911804	1.64015	0.385172	0.560814	0.146191
	hsa-mir-103-2	-0.311887	8.07708	0.525894	0.586788	-0.00835208	0.712517	0.954544	-0.150496	0.556341	0.227374
	hsa-mir-2116	-0.292163	NA	NA	2.24065	0.0888794	1.02203	1.31177	-1.41504	0.555453	0.395192
	hsa-mir-380	0.707837	NA	NA	1.72608	-0.35858	-3.73286	3.31177	0.392317	0.550077	0.73829
	hsa-mir-29b-1	0.646436	2.17957	-0.224827	0.421221	1.6869	0.437064	-2.35255	2.83763	0.54175	0.25503
	hsa-mir-365-2	0.340105	-0.944552	2.19396	-2.18562	0.738548	2.43887	1.29303	-0.271974	0.539326	0.443447
	hsa-mir-548j	0.565818	1.00964	-0.417472	0.0868435	0.752452	0.466811	-0.69982	1.24978	0.516314	0.160222
	hsa-mir-597	NA	NA	1.31949	1.91872	0.129521	0.896495	-1.59512	-1.22239	0.513008	0.69258
	hsa-mir-204	3.73906	-1.57532	1.58253	-1.78755	4.1201	-0.688467	6.70225	-0.561879	0.510324	0.232889
	hsa-mir-452	0.733677	1.15363	-0.163514	0.457633	1.13376	0.533878	0.362924	0.00336497	0.495756	0.0165933
	hsa-mir-424	1.61164	0.874714	0.116442	1.92859	-0.748819	-3.11748	-0.163821	1.13518	0.495578	0.731404
	hsa-mir-19a	1.604	0.125121	-0.739401	2.52605	0.746193	-3.15809	0.239199	1.42146	0.492696	0.591614
	hsa-mir-340	0.673317	8.17567	-0.46522	-0.682507	0.0514712	0.295448	0.836861	1.19503	0.484383	0.253704
	hsa-mir-181c	0.269716	0.694142	3.41903	1.42507	0.394316	0.0129241	0.561506	0.157988	0.477911	0.0645154
	hsa-mir-543	-2.73962	0.482397	1.39446	-2.50925	0.462308	2.65847	1.20195	-1.66003	0.472352	0.902693
	hsa-mir-1228	NA	NA	NA	2.24065	0.351914	NA	0.574803	-0.415037	0.463358	0.30624
	hsa-mir-483	-2.59702	-0.883441	4.55215	-2.17814	0.617989	2.10634	1.6447	0.308253	0.463121	0.609379
	hsa-mir-25	0.223545	0.695439	1.3642	0.147609	0.0660764	1.27687	1.06626	0.0528985	0.459492	0.0176438
	hsa-mir-454	2.07707	2.33157	-3.17236	0.985392	-0.54375	-2.56294	0.187779	0.726982	0.45738	0.995966
	hsa-mir-455	-0.0678984	0.854921	1.22861	0.441337	0.271239	0.472802	0.643648	-0.313654	0.457069	0.0386666
	hsa-mir-1284	-1.29216	1.00964	NA	-3.51424	0.45145	2.64652	1.10532	-1	0.45145	0.915091
	hsa-mir-3121	NA	-0.990356	1.58253	-0.566706	0.0299857	2.96063	0.449272	0.754888	0.449272	0.279386
	hsa-mir-128-1	2.37672	-1.28314	1.81385	-1.27411	-0.929077	0.599018	3.51996	0.291916	0.445467	0.348052
	hsa-mir-589	0.968364	-0.870062	-0.286228	1.75522	-0.0795742	-0.522522	1.31177	2.06496	0.444395	0.212457
	hsa-mir-1255a	-2.29216	3.2191	0.979418	-0.663894	0.169854	1.2163	0.681718	-0.126633	0.425786	0.502364
	hsa-mir-505	0.677463	0.171915	1.39349	-1.06566	-0.0353252	2.60081	1.27679	-1.21027	0.424689	0.330494
	hsa-mir-222	-1.02166	0.700439	-0.0438926	-0.426534	1.32575	1.47863	1.23458	0.148295	0.424367	0.227528
	hsa-mir-1908	NA	NA	-0.00243493	0.825611	NA	NA	NA	NA	0.411588	0.501878
	hsa-mir-3187	NA	NA	NA	-0.759351	NA	NA	1.5748	NA	0.407726	0.786031
	hsa-mir-17	0.789732	0.710084	-0.843198	1.41051	-0.133041	-1.94947	0.55678	0.222392	0.389586	0.807045
	hsa-mir-3126	NA	0.00964383	NA	-0.759351	0.766951	-1.56294	0.98984	1.16993	0.388298	0.826534
	hsa-mir-34b	0.408276	-0.405394	0.360135	0.455662	1.1655	-0.218982	-3.79152	0.402098	0.381117	0.717681
	hsa-mir-502	1.15025	-0.308718	0.377989	1.49377	0.375679	-0.842673	-1.67204	0.374694	0.375186	0.7548
	hsa-mir-3174	NA	NA	-0.00243493	0.103145	0.614948	1.52453	0.98984	-4.44089e-16	0.359047	0.0886882
	hsa-mir-3136	0.7953	-0.727322	-0.19508	1.07072	0.503917	0.209653	-0.273194	0.70044	0.356785	0.271309
	hsa-mir-1305	NA	NA	NA	NA	0.351914	NA	NA	NA	0.351914	NA
	hsa-mir-3138	-1.29216	0.594606	0.582528	-1.45979	0.351914	NA	0.98984	-0.77259	0.351914	0.718061
	hsa-mir-3153	NA	NA	NA	NA	0.351914	NA	NA	NA	0.351914	NA
	hsa-mir-770	NA	NA	NA	NA	0.351914	NA	NA	NA	0.351914	NA
	hsa-mir-185	2.34608	0.184459	0.437746	-1.82137	0.253089	2.42388	1.82682	0.163553	0.345417	0.191115
	hsa-mir-320c-2	1.87776	0.720137	2.95839	-1.86978	-0.0351093	3.04756	-0.547817	-2.55695	0.342514	0.563794
	hsa-mir-30e	1.74712	0.629146	0.847997	-0.283045	0.0195476	0.687184	-0.901858	-0.0744952	0.324347	0.284344
	hsa-let-7g	0.691073	-0.0134699	0.635545	2.16578	-0.223011	-0.215604	-1.63333	1.02955	0.311037	0.463848
	hsa-mir-369	-1.52663	1.54214	-0.747178	0.101726	0.889363	-0.60141	0.511434	0.538538	0.30658	0.80845
	hsa-mir-3127	2.94488	-0.368868	1.21996	0.565611	-0.541171	2.00475	-1.0636	0.0443941	0.305003	0.25543
	hsa-mir-641	-1.41769	1.14715	1.36014	-0.389402	-0.447173	0.990317	1.47171	-0.671946	0.300458	0.535488
	hsa-mir-486	0.515192	0.0836444	1.80492	-1.75935	-0.541171	1.09528	-2.59512	0.938599	0.299418	0.916949
	hsa-mir-301b	NA	0.00964383	NA	1.56258	-0.195574	-2.09345	2.97335	0.584963	0.297303	0.528716
	hsa-mir-29a	1.26878	0.139581	0.613421	-0.322957	-0.031982	1.31495	-1.36912	0.445788	0.292684	0.433995
	hsa-mir-23a	0.247059	1.13688	0.073351	0.871046	0.337569	-1.38837	-0.888389	0.48062	0.292314	0.728889
	hsa-mir-151	0.249049	-0.559502	0.928799	1.53864	0.321222	0.179236	0.881207	-0.0224953	0.285136	0.0980682
	hsa-mir-579	NA	NA	-1.00243	-0.218783	0.199911	0.758992	0.574803	0.36257	0.28124	0.685159
	hsa-mir-30d	2.67873	-1.79689	-0.928893	-0.0840978	0.623878	1.68652	1.18157	-0.0723469	0.275766	0.446636
	hsa-mir-188	1.9098	0.116559	-0.0436576	0.856772	1.29164	-2.0213	-0.475824	0.428237	0.272398	0.561679
	hsa-mir-148a	1.32739	0.336744	-0.594989	0.298908	-0.055766	0.2382	-1.68386	1.35158	0.268554	0.676501
	hsa-mir-874	-1.29216	-0.542897	-0.224827	0.225542	0.305371	1.21842	1.14596	1.01792	0.265457	0.48624
	hsa-mir-654	0.158498	-0.649319	-1.56315	0.721131	0.370578	-1.06448	0.503249	0.436517	0.264538	0.662353
	hsa-mir-324	0.602308	-0.718277	-0.978976	1.24308	0.304027	0.0355095	0.694016	0.221324	0.262675	0.520286
	hsa-mir-210	1.49952	-0.430929	-0.0442551	2.19419	-0.0167417	-0.271502	0.536474	1.52268	0.259866	0.117046
	hsa-mir-410	-2.40582	0.816999	-2.40098	0.78927	0.29357	-2.47547	1.22157	0.219313	0.256441	0.42156
	hsa-mir-320d-1	NA	NA	NA	0.240649	NA	NA	NA	NA	0.240649	NA
	hsa-mir-564	NA	NA	NA	0.240649	NA	NA	NA	NA	0.240649	NA
	hsa-mir-570	0.292799	NA	-3.00243	0.240649	0.936876	-1.97797	-3.09762	1.43296	0.240649	0.344133
	hsa-mir-665	-0.591724	NA	0.582528	0.240649	2.67384	-2.42543	1.31177	-0.106915	0.240649	0.702097
	hsa-mir-491	3.3708	1.817	0.287072	2.52444	0.16971	-0.938445	-1.08816	-0.0227201	0.228391	0.225288
	hsa-mir-1306	0.752231	-1.63421	0.872034	-0.447407	-0.155046	2.31358	0.600986	-0.948861	0.22297	0.70905
	hsa-mir-101-1	1.04769	0.672609	0.482992	1.37225	-0.0371285	-1.62042	-2.47279	-0.205584	0.222932	0.845536
	hsa-mir-1275	NA	NA	NA	1.91872	1.67384	NA	-2.05455	-1.25634	0.208751	0.948849
	hsa-mir-361	1.89698	0.287325	-1.27882	0.807848	-0.24499	-1.6535	0.126529	1.30894	0.206927	0.726267
	hsa-mir-92a-2	1.93023	2.59461	-0.183007	2.18933	-1.31352	-0.175606	0.0164097	0.384664	0.200537	0.208147
	hsa-mir-3143	-0.484808	NA	NA	0.318651	0.574306	0.295045	-1.01016	0.0995357	0.19729	0.892576
	hsa-mir-199a-2	-0.992603	1.09711	0.892769	-0.0600498	0.787598	0.451508	-2.24186	-0.809417	0.195729	0.797195
	hsa-mir-660	2.47197	-0.0158913	-1.16731	-0.554695	0.960214	0.394503	-1.72467	0.654945	0.189306	0.792236
	hsa-mir-484	2.39233	0.0846059	0.0800272	0.667973	-1.24622	0.288306	1.48878	-0.279382	0.186456	0.304197
	hsa-mir-3146	NA	0.00964383	NA	-2.34431	0.351914	-0.241008	1.5748	1	0.180779	0.919695
	hsa-mir-1274b	0.980855	2.80106	0.425659	-1.19051	-1.53776	-0.0681715	-1.18008	0.593951	0.178744	0.844828
	hsa-mir-499	4.67197	-1.41357	0.454122	-1.23728	1.83797	-0.102588	2.91342	-0.429717	0.175767	0.305045
	hsa-mir-382	-1.56634	-0.548519	0.0619155	0.704828	1.67399	1.03222	-0.0533535	0.289478	0.175697	0.587745
	hsa-mir-1256	NA	NA	NA	NA	-1.23305	-2.56294	1.5748	1.58496	0.170877	0.888158
	hsa-mir-3192	NA	-2.79771	-2.00243	-0.685351	0.544559	2.31971	0.98984	0.169925	0.169925	0.764879
	hsa-mir-365-1	0.167268	-0.0469397	-0.053061	0.647926	1.06157	0.301519	0.17117	-0.29059	0.169219	0.152716
	hsa-mir-548n	-0.122238	NA	-0.00243493	0.588572	0.159269	-0.825971	2.36835	0.584963	0.159269	0.336336
	hsa-mir-374a	-1.90917	0.586095	-0.366884	0.000359237	1.4074	-0.294521	0.314197	0.603361	0.157278	0.904999
	hsa-let-7b	1.14099	-1.17831	2.25995	-1.07311	0.415991	2.57152	-1.03146	-0.102566	0.156712	0.501047
	hsa-mir-548l	-0.385273	0.272678	-1.5874	0.0480038	-0.366315	0.244419	1.70033	0.742504	0.146211	0.810655
	hsa-mir-412	NA	NA	NA	0.240649	1.88243	NA	-0.01016	0.0374747	0.139062	0.319458
	hsa-mir-3176	-1.5552	0.00964383	-0.587397	2.56258	1.64737	0.174029	0.98984	0.0995357	0.136783	0.390773
	hsa-mir-590	1.39373	2.89717	-1.82556	-0.145534	0.418551	-1.78306	-2.44267	0.442451	0.136509	0.844535
	hsa-mir-217	-2.17669	-0.990356	-0.417472	1.41819	2.22263	2.58681	-1.83328	0.68226	0.132394	0.779853
	hsa-mir-3200	1.75223	0.495071	1.73453	-0.258922	0.181989	-0.504043	0.0800378	-1.05889	0.131013	0.422455
	hsa-mir-134	2.14524	-0.754543	-1.74751	0.240649	1.39793	-1.64909	0.01016	1.23704	0.125404	0.834424
	hsa-mir-3128	NA	0.00964383	-0.00243493	0.240649	1.35191	NA	-0.01016	1.58496	0.125146	0.13913
	hsa-mir-548e	-1.42822	0.627773	-1.20174	0.275414	-0.198053	0.460396	0.0309452	0.218365	0.124655	0.590701
	hsa-mir-103-1	0.433662	2.817	-0.602348	0.811605	1.2469	-0.229512	-0.192158	-0.344648	0.120752	0.258108
	hsa-let-7a-1	1.51948	-0.15945	2.15102	-0.788841	0.0676614	0.542769	-0.0161374	0.171854	0.119758	0.237795
	hsa-mir-155	0.0479122	0.747597	-0.65662	-0.160274	0.182533	3.98846	-1.86333	4.28744	0.115222	0.322727
	hsa-mir-100	0.0683708	-0.509646	0.156171	-0.748689	1.4365	0.681455	-1.50112	0.673653	0.112271	0.925131
	hsa-let-7f-1	0.821019	0.827806	0.419955	-0.122186	-0.143626	-1.52472	-2.46549	0.343954	0.110884	0.596482
	hsa-mir-323b	-3.87713	0.00964383	0.80492	-0.505595	1.22638	NA	3.70866	0.0995357	0.0995357	0.815177
	hsa-mir-20a	3.06897	0.114997	-1.54341	1.44113	-0.611468	-3.10802	0.782353	0.0755613	0.0952791	0.968003
	hsa-mir-26b	1.33023	0.288097	0.0527321	-2.16032	0.102213	1.18955	-0.303839	-0.229445	0.0774726	0.931901
	hsa-mir-379	0.262426	-1.37502	-1.0759	0.401849	-0.00083939	0.769081	0.142575	-0.216406	0.0708679	0.615836
	hsa-mir-3165	NA	NA	NA	1.07072	-0.870479	-1.97797	1.5748	0.0703893	0.0703893	0.969147
	hsa-mir-551a	NA	NA	2.31949	-0.174389	0.0624072	NA	2.98984	-0.874469	0.0624072	0.315646
	hsa-mir-30b	2.77963	-0.898933	-1.07255	1.79788	0.24484	-0.121008	0.588861	-0.126461	0.0619158	0.418718
	hsa-mir-197	1.3127	-1.66278	0.140523	0.837293	-0.158553	3.15651	-0.0212719	-0.0570547	0.0596255	0.398593
	hsa-let-7d	0.927871	0.322905	1.82543	-1.72155	-0.207472	2.33166	-1.44741	-1.53717	0.0577167	0.914286
	hsa-mir-1294	-0.292163	0.00964383	0.0800272	-1.59585	0.0718059	2.75899	-0.388672	0.807355	0.0407249	0.69187
	hsa-mir-582	1.89226	1.26598	0.185192	-0.240691	-0.108638	-1.89997	0.546233	-0.180572	0.0382769	0.662105
	hsa-mir-765	NA	NA	0.80492	-4.71355	-1.64809	3.62689	2.89673	-0.736966	0.0339772	0.976921
	hsa-mir-632	NA	NA	NA	0.0707239	0.351914	NA	-0.01016	-0.152003	0.0302819	0.582791
	hsa-mir-4317	-1.29216	NA	NA	NA	1.35191	NA	NA	NA	0.0298753	0.985616
	hsa-mir-320b-1	0.0297649	NA	NA	-0.666242	0.714484	NA	0.105317	-1.09311	0.0297649	0.595459
	hsa-mir-548k	-0.58167	1.12512	0.0541486	1.0611	-0.326158	0.0041044	-0.0524708	0.811555	0.0291265	0.291391
	hsa-mir-376b	-0.866857	2.67261	-2.10677	0.887012	0.610648	-2.84165	-0.558597	0.906891	0.0260257	0.805486
	hsa-mir-346	NA	NA	NA	1.82561	-0.233049	0.0220263	NA	NA	0.0220263	0.493532
	hsa-mir-125b-1	-1.7072	-0.0492499	0.0906745	-1.38124	0.0809525	3.57222	0.129003	-0.848691	0.0158513	0.980906
	hsa-mir-7-1	-0.240075	0.223769	-0.19508	0.434659	-0.799214	-1.72807	0.481968	0.584963	0.0143443	0.595991
	hsa-mir-889	-0.0243003	-0.795978	-1.7394	0.0448871	1.2048	-2.10799	2.2214	1.53998	0.0102934	0.939814
	hsa-mir-1537	NA	0.00964383	-2.32436	0.133734	0.936876	-2.06044	-1.33209	1.64386	0.00964383	0.483036
	hsa-mir-29b-2	2.07007	0.157742	-0.963441	1.04361	-0.140658	-2.70279	-1.10834	1.8771	0.00854227	0.960844
	hsa-mir-659	-0.176686	1.59461	1.2606	0.034198	-1.26106	2.86333	-2.89769	-0.0339473	0.000125327	0.79112
	hsa-mir-3193	NA	-0.575319	NA	0.825611	-1.64809	NA	0.252874	0	0	0.614717
	hsa-mir-128-2	-1.7072	NA	-0.00243493	-0.566706	-0.0631237	2.52453	3.085	0.510962	-0.00243493	0.432878
	hsa-mir-548b	-2.29216	NA	-0.00243493	0.240649	-1.87048	-1.56294	0.574803	0.584963	-0.00243493	0.2358
	hsa-mir-3190	0.0297649	0.816999	-1.00243	-0.0812792	-0.400159	2.8965	0.437299	-0.0365259	-0.00338051	0.4469
	hsa-mir-939	NA	NA	NA	NA	NA	NA	0.98984	-1	-0.00508	0.996749
	hsa-mir-637	NA	NA	-0.00243493	NA	0.351914	NA	-0.01016	-0.415037	-0.00629746	0.911502
	hsa-mir-1282	NA	NA	NA	NA	NA	NA	-0.01016	NA	-0.01016	NA
	hsa-mir-611	NA	NA	NA	NA	NA	NA	-0.01016	NA	-0.01016	NA
	hsa-mir-668	NA	NA	0.997565	-1.34431	NA	1.02203	-0.01016	-1.22239	-0.01016	0.838873
	hsa-mir-943	NA	NA	NA	NA	NA	NA	-0.01016	NA	-0.01016	NA
	hsa-mir-33a	-0.325704	0.29734	0.625341	1.03606	0.30661	-0.723216	-0.831315	-0.577449	-0.0141818	0.92384
	hsa-mir-18a	3.10196	-0.740378	-2.23125	2.06812	-0.37317	-3.32616	1.69386	0.34299	-0.0150902	0.933478
	hsa-mir-142	-3.10313	2.44351	-0.461177	-1.49533	0.418339	2.14781	-3.48008	2.11761	-0.0214188	0.838845
	hsa-mir-3135	NA	NA	NA	NA	-0.648086	NA	NA	0.584963	-0.0315618	0.967438
	hsa-mir-371	NA	0.00964383	NA	-0.0589114	-0.0135416	2.11126	-1.1167	-0.874469	-0.0362265	0.984397
	hsa-mir-323	-3.29216	-0.338279	0.855546	-1.736	0.262416	0.651383	1.42523	-1.92537	-0.0379319	0.406442
	hsa-mir-93	1.76671	-0.99122	-1.35856	0.841877	-0.392962	-1.68118	1.26853	0.314657	-0.0391522	0.950389
	hsa-mir-639	-1.87713	NA	NA	0.918721	NA	NA	-1.01016	1.32193	-0.0457196	0.846269
	hsa-mir-766	-1.26468	0.322802	0.518397	-0.621115	-0.333978	3.64351	-0.603535	0.235513	-0.0492321	0.66796
	hsa-let-7c	0.22807	-2.26241	2.08577	-1.36361	0.582276	0.888729	-1.53971	-0.334893	-0.0534112	0.687292
	hsa-mir-1277	1.1341	0.207583	-0.324363	-1.61496	-0.554977	-0.755581	0.620606	0.255586	-0.0583899	0.685848
	hsa-mir-214	-0.375259	0.257571	0.272004	-1.2894	0.532486	1.73565	-2.47442	-0.974433	-0.0588438	0.545685
	hsa-mir-1976	-0.0995182	NA	-0.417472	0.562577	-0.0265978	NA	-0.425197	0.0703893	-0.063058	0.723049
	hsa-mir-1307	1.011	-1.03072	0.114032	-0.0661854	-0.604115	1.19831	-0.0645407	-0.345988	-0.0653631	0.924067
	hsa-mir-3074	2.92377	-0.0922358	1.47179	-2.0463	-0.0632967	1.34885	-0.120959	-0.862824	-0.0777663	0.576174
	hsa-mir-1226	NA	NA	NA	-0.0812792	-0.233049	0.244419	NA	NA	-0.0812792	0.883803
	hsa-mir-362	-0.541464	0.727244	-1.54626	0.371188	0.47105	-1.74728	-2.01016	0.705257	-0.0851375	0.31611
	hsa-let-7a-2	1.96766	-0.538368	1.6207	-0.481868	-0.0586063	0.173863	-0.386145	-0.114896	-0.086751	0.453623
	hsa-mir-1273c	NA	NA	NA	-0.759351	NA	NA	NA	0.584963	-0.0871943	0.917874
	hsa-mir-573	NA	NA	NA	0.240649	0.673842	NA	-1.01016	-0.415037	-0.0871943	0.752577
	hsa-mir-299	2.64867	-1.36887	-3.14539	1.03869	0.129151	-3.08034	-0.332088	0.203533	-0.101468	0.509193
	hsa-mir-1278	-0.707201	0.173143	-0.00243493	-1.89562	-0.201286	0.146015	0.0365332	-0.598567	-0.101861	0.164851
	hsa-mir-193b	-3.25548	-0.19199	0.191887	1.61742	-0.661857	0.416066	-0.0121431	-0.965371	-0.102067	0.494665
	hsa-mir-99b	-2.44343	-0.308663	2.31132	0.102961	-0.978362	1.51711	1.85625	-1.09948	-0.102851	0.84389
	hsa-mir-301a	0.204263	0.637675	-0.374404	-0.354229	0.128563	-0.796479	1.2595	-1.36987	-0.112833	0.784086
	hsa-mir-33b	-0.28645	0.00964383	0.101902	0.182643	0.195229	-2.04729	-0.972577	-0.252484	-0.12142	0.20336
	hsa-mir-1297	NA	NA	NA	NA	1.35191	NA	-1.59512	NA	-0.121604	0.947581
	hsa-mir-760	-2.7072	0.424681	NA	-1.9688	-0.133513	4.94882	3.58479	-1.14086	-0.133513	0.703826
	hsa-let-7e	-0.000618516	-0.274182	1.89409	-1.3242	-0.281421	1.04425	2.88652	-0.824108	-0.1374	0.466649
	hsa-mir-3115	NA	NA	NA	-0.759351	0.766951	-5.88486	0.475267	NA	-0.142042	0.446984
	hsa-mir-107	0.822135	-1.62225	0.491057	-0.256036	-0.124296	-0.177459	1.75998	-1.23849	-0.150878	0.913751
	hsa-mir-330	-0.651058	0.144573	0.757206	-1.33424	-0.48293	2.66981	1.07993	-0.450461	-0.152944	0.642247
	hsa-let-7f-2	1.90224	-0.148171	0.795972	-0.17679	-0.519405	-2.41867	-1.01186	0.470514	-0.162481	0.769312
	hsa-mir-126	-1.36689	1.17055	0.343225	-0.296285	-0.00636601	-0.718257	-2.55216	-0.0299629	-0.163124	0.316458
	hsa-mir-130b	-0.155075	0.36954	-1.14184	-0.391443	0.0377303	-1.53595	0.89012	-0.179615	-0.167345	0.370896
	hsa-mir-1289-1	NA	NA	NA	-0.174389	NA	NA	NA	NA	-0.174389	NA
	hsa-mir-1909	NA	NA	NA	-0.174389	NA	NA	NA	NA	-0.174389	NA
	hsa-mir-22	-0.773726	0.424295	-1.02097	0.611653	1.20523	-1.61015	-1.49935	0.624567	-0.174716	0.530656
	hsa-mir-377	-1.97024	2.817	-3.40843	1.2109	0.529811	-4.579	-0.852619	0.496153	-0.178233	0.438527
	hsa-mir-627	0.292799	-0.405394	NA	0.0480038	0.477445	-2.07751	-0.180085	-0.874469	-0.180085	0.281966
	hsa-mir-320a	-0.490622	0.206102	2.11804	-1.24017	-1.20152	2.30676	0.120051	-1.55487	-0.185286	0.951772
	hsa-mir-3157	NA	NA	-0.00243493	0.918721	-0.385052	NA	NA	-0.415037	-0.193743	0.931486
	hsa-mir-3173	NA	NA	-0.00243493	-1.99639	-0.385052	1.34395	0.574803	-3.5025	-0.193743	0.405555
	hsa-mir-2276	NA	NA	NA	3.24065	-0.385052	-0.562936	-0.01016	NA	-0.197606	0.570068
	hsa-mir-487b	-2.37768	0.0527125	-3.08423	-0.188663	-0.114359	-2.69866	-0.214091	0.112398	-0.201377	0.0668977
	hsa-mir-602	NA	NA	NA	NA	NA	-0.977974	0.574803	NA	-0.201586	0.838276
	hsa-mir-146a	-0.213986	-0.599041	-0.0368246	1.75533	-0.710653	-1.30613	-0.204747	3.74406	-0.209367	0.618597
	hsa-mir-92b	1.15229	-0.832856	1.10376	-1.57573	-0.603101	1.25044	-0.0932865	-0.325547	-0.209417	0.980364
	hsa-mir-1236	NA	NA	NA	NA	NA	NA	1.5748	-2	-0.212599	0.924633
	hsa-mir-199b	-2.44272	0.746609	-0.975963	-1.39221	1.19463	-0.0550406	0.979958	-0.407009	-0.231025	0.533392
	hsa-mir-3130-2	NA	NA	NA	NA	-0.233049	NA	-0.595122	1.16993	-0.233049	0.851992
	hsa-mir-1287	2.95576	-1.37502	0.997565	-0.218783	-1.78559	0.939564	-0.688232	-0.254573	-0.236678	0.898338
	hsa-mir-4309	NA	NA	NA	NA	NA	-0.241008	-1.59512	2.58496	-0.241008	0.858113
	hsa-mir-106b	3.5715	-0.856785	-0.816604	0.474657	-0.205966	-2.21245	1.19418	-0.281605	-0.243786	0.863685
	hsa-mir-433	-3.14777	-0.422072	-0.0719759	-1.7351	0.00399053	2.68499	0.476136	-1.59707	-0.247024	0.465133
	hsa-mir-1296	1.06539	-3.6908	-1.22483	2.41057	-1.48939	-2.56294	2.31177	0.722466	-0.251181	0.712837
	hsa-mir-548a-3	NA	NA	NA	NA	0.351914	-1.56294	-0.273194	NA	-0.273194	0.472731
	hsa-mir-154	0.0863484	-1.34399	-0.476366	0.606298	-0.748613	-0.750022	0.234259	-0.111257	-0.293811	0.205495
	hsa-mir-15b	2.19709	-0.272332	-2.03307	-0.329816	-1.57998	1.47878	-2.08051	0.319785	-0.301074	0.623806
	hsa-mir-296	NA	-2.16028	-0.00243493	2.16152	-0.606266	NA	2.94093	-1.80735	-0.30435	0.921668
	hsa-mir-320c-1	1.2928	NA	2.66053	-0.467888	-0.311051	4.42575	-0.379394	-2.03953	-0.311051	0.408278
	hsa-mir-200b	0.499737	-0.0818304	0.998435	-0.4322	-0.192549	-2.75891	-1.65931	-1.11193	-0.312375	0.209163
	hsa-mir-7-3	-0.707201	NA	NA	-0.000359237	-0.648086	-3.56294	6.89673	1.39232	-0.324223	0.710364
	hsa-mir-664	-1.39792	0.0952889	1.12869	-1.19888	-0.145484	0.351334	-1.5025	-0.521178	-0.333331	0.26525
	hsa-mir-3145	-0.484808	2.33157	-1.5874	0.410574	-0.200627	-0.977974	1.4373	-1.66297	-0.342718	0.860138
	hsa-mir-370	0.877762	NA	-0.365005	0.184065	-0.695392	2.82938	-0.344579	-0.620152	-0.344579	0.594133
	hsa-mir-342	0.576866	-0.142914	-0.566174	-1.98967	-1.77484	3.26021	-3.97282	0.83487	-0.354544	0.558894
	hsa-mir-152	0.29162	-0.311277	-0.561862	-1.81719	-0.569225	0.844554	-0.401266	-0.191832	-0.356271	0.250432
	hsa-mir-101-2	1.22724	-0.203401	0.603045	1.62619	-0.922555	-0.516317	-2.65899	-0.735183	-0.359859	0.693823
	hsa-mir-16-2	-0.64235	0.784577	-0.324363	0.563735	-0.417755	-0.555493	-0.795351	0.0717299	-0.371059	0.44914
	hsa-mir-656	-1.64009	NA	NA	-0.344314	1.17504	-2.97797	0.279347	-0.415037	-0.379676	0.324383
	hsa-mir-552	-2.38838	-1.82861	-4.23947	3.3	2.67969	-4.41441	4.26094	1.04622	-0.391191	0.87578
	hsa-mir-28	-1.93963	-0.226709	0.0717772	0.189971	-0.558631	-0.122222	-2.14865	-1.75045	-0.39267	0.0503459
	hsa-mir-432	-0.347305	-1.34944	-0.797615	-1.79122	0.821578	2.88512	1.32067	-0.46002	-0.403662	0.950422
	hsa-mir-132	-0.849645	0.00964383	-0.338718	-0.997475	-0.46882	0.95193	0.160459	-0.632666	-0.403769	0.265205
	hsa-mir-616	NA	NA	-0.00243493	-0.174389	-0.648086	NA	NA	-1	-0.411237	0.137902
	hsa-mir-133a-2	NA	NA	NA	NA	-1.64809	NA	-0.01016	-0.415037	-0.415037	0.295699
	hsa-mir-18b	NA	NA	NA	-2.34431	-0.233049	-1.88486	-0.332088	-0.415037	-0.415037	0.0792005
	hsa-mir-2861	NA	NA	NA	NA	NA	NA	NA	-0.415037	-0.415037	NA
	hsa-mir-3178	NA	NA	NA	NA	NA	NA	NA	-0.415037	-0.415037	NA
	hsa-mir-586	NA	NA	NA	NA	NA	NA	NA	-0.415037	-0.415037	NA
	hsa-mir-942	-1.06977	-0.279863	-2.80979	-1.61496	-0.396547	0.137504	-0.450733	0.688056	-0.42364	0.10322
	hsa-mir-576	-1.61409	0.495071	-0.417472	0.489676	-0.946266	-3.23431	-0.435466	0.0424353	-0.426469	0.154718
	hsa-mir-30a	0.15947	-0.489202	-1.37545	-0.955263	-0.129171	0.224289	-3.05451	-0.370205	-0.429704	0.0899468
	hsa-mir-429	1.90073	-0.447394	-0.187546	0.504176	-0.433267	-3.44435	-1.23219	-1.91897	-0.44033	0.283022
	hsa-mir-425	-0.563022	-0.1908	-1.43932	2.97076	-1.25836	-3.55972	-0.320663	0.305009	-0.441842	0.460797
	hsa-mir-625	-2.29216	NA	NA	1.65569	-0.648086	-0.241008	-1.01016	-0.0671142	-0.444547	0.448835
	hsa-mir-16-1	3.01162	0.154034	-2.23273	-0.306094	-0.586416	-2.15373	-1.53042	0.245476	-0.446255	0.501374
	hsa-mir-628	-1.13462	2.00964	0.482992	-1.58038	0.573128	-0.255508	-0.638191	-0.784271	-0.446849	0.695369
	hsa-mir-328	-2.14016	-2.06075	-0.543003	-0.351927	0.685338	2.29504	-0.265417	-1.70261	-0.447465	0.369543
	hsa-mir-193a	-0.327679	-1.74154	0.898615	-0.580707	0.462364	-1.44658	-0.961976	-0.0514673	-0.454193	0.187439
	hsa-mir-1180	NA	-1.99036	-1.00243	-0.455959	-1.49608	2.39126	2.23777	-0.0671142	-0.455959	0.936339
	hsa-mir-655	-1.7072	-1.183	NA	-0.455959	1.08602	-3.62522	0.726806	1.29739	-0.455959	0.442656
	hsa-mir-200a	1.77848	0.0603171	0.382934	0.945099	-0.972976	-3.11124	-1.18518	-1.625	-0.456329	0.427518
	hsa-mir-26a-2	0.421274	4.57443	-0.595525	-1.39394	-0.67844	-0.996928	-0.332088	-0.119731	-0.463807	0.873727
	hsa-mir-32	2.90483	0.479129	-1.08816	-0.375647	-0.839192	-3.27833	-0.568528	0.214183	-0.472088	0.618522
	hsa-mir-219-2	1.35169	-1.57532	-1.00243	0.125172	0.0470592	-1.4634	1.1503	-1.078	-0.477688	0.475694
	hsa-mir-652	-0.515478	-0.447401	-1.31448	2.81231	-0.324772	-1.58454	-1.09672	0.0531113	-0.48144	0.553228
	hsa-mir-3197	NA	NA	NA	NA	NA	-1.56294	NA	0.584963	-0.488987	0.727994
	hsa-mir-127	1.44757	-1.76351	-0.912493	-0.795355	-1.05992	2.18639	0.268571	-0.184946	-0.490151	0.836314
	hsa-mir-1291	-3.4938	-0.423316	3.03319	-1.00662	-0.564428	3.14541	-1.51486	-0.280433	-0.493872	0.866327
	hsa-mir-1266	-1.7072	NA	0.997565	1.048	-1.64809	NA	-1.59512	0.584963	-0.50508	0.527007
	hsa-mir-1181	NA	NA	NA	NA	NA	NA	-1.01016	0	-0.50508	0.5
	hsa-mir-487a	-0.292163	-0.990356	-1.48786	1.03902	1.23386	-2.0295	0.767448	-0.719892	-0.506028	0.49411
	hsa-mir-15a	2.80786	0.0988275	-2.40643	-0.568467	-0.458253	-3.23495	-1.45705	0.316641	-0.51336	0.379537
	hsa-mir-1260	-2.87713	2.33157	-0.612488	-0.420766	-0.399699	0.684991	-0.83119	-0.94847	-0.516627	0.48634
	hsa-mir-374b	-0.909978	1.07277	-0.714911	-0.339989	1.34479	-1.60746	-0.785563	0.0457951	-0.52745	0.529214
	hsa-mir-381	-0.292163	-0.331393	-0.718642	0.0909017	-1.42149	-3.05598	-0.344579	-0.765535	-0.53161	0.0455082
	hsa-mir-944	-3.65473	1.33157	0.0850279	-1.15167	-1.48634	2.59549	-3.64243	2.24793	-0.53332	0.61237
	hsa-mir-624	NA	NA	0.997565	-1.67689	-0.202675	-1.93845	-0.202805	-0.874469	-0.538637	0.202188
	hsa-mir-1271	-1.06977	-0.923242	2.13507	-0.174389	0.0269517	3.45943	-1.06905	-1.32193	-0.548815	0.835561
	hsa-mir-10a	1.9944	-2.19437	1.729	-0.674875	-0.440279	-2.89903	-0.386769	-1.58599	-0.557577	0.393272
	hsa-mir-3154	NA	NA	-0.587397	NA	-1.55498	1.50315	3.0773	-4.24793	-0.587397	0.788586
	hsa-mir-489	NA	NA	NA	-2.66624	-0.602282	2.75899	-0.01016	-1.11548	-0.602282	0.731506
	hsa-mir-373	NA	NA	NA	-0.607348	0.0888794	NA	-1.23255	NA	-0.607348	0.265796
	hsa-mir-219-1	0.347247	-1.89725	2.64142	0.334976	-1.39655	-0.103505	-1.18008	-1.20645	-0.641795	0.569341
	hsa-mir-600	-0.292163	NA	NA	1.46304	-1.38505	1.43706	-1.59512	-1	-0.646082	0.700356
	hsa-mir-135a-2	NA	NA	NA	NA	-0.648086	NA	11.0586	-3.9386	-0.648086	0.682182
	hsa-mir-3188	0.515192	-0.990356	NA	-2.84681	-0.648086	1.82938	-1.59512	-0.321928	-0.648086	0.344569
	hsa-mir-495	-1.80472	0.706717	-1.19924	-0.991298	0.398237	-1.28058	0.139514	-0.308608	-0.649953	0.133887
	hsa-mir-1179	NA	0.00964383	-1.00243	-2.08128	-0.870479	-0.656046	-0.64759	-0.308122	-0.656046	0.0192515
	hsa-mir-26a-1	-0.526628	3.46908	-0.941034	-1.36139	1.08024	-1.79938	-0.809247	0.539159	-0.667938	0.94435
	hsa-mir-592	NA	-0.668428	-1.11791	3.62531	0.477445	-3.92551	-1.46959	0.97728	-0.668428	0.746251
	hsa-mir-320e	NA	NA	NA	-0.759351	0.351914	NA	-0.595122	-1.73697	-0.677237	0.207648
	hsa-mir-548t	-0.292163	-1.57532	2.11304	-1.45123	-1.42945	0.15953	0.574803	-1.078	-0.685083	0.440061
	hsa-mir-191	-0.743573	-0.453547	0.467392	-0.820332	-1.44213	-1.2134	-0.658223	-0.64104	-0.700898	0.0110371
	hsa-mir-1827	-3.15199	4.6535	-0.956631	0.143038	-0.191172	-5.60368	-2.0998	-0.450661	-0.703646	0.390494
	hsa-mir-337	-2.23772	-0.312284	-3.46187	-0.174389	-0.136705	-3.39944	1.90841	-1.10093	-0.706607	0.129859
	hsa-mir-1468	-0.707201	-0.990356	2.21996	-0.589426	0.673842	NA	-1.01016	-1.41504	-0.707201	0.609389
	hsa-mir-376a-1	-0.707201	NA	-2.5874	1.65569	-1.29194	-3.92551	0.404878	-0.552541	-0.707201	0.201833
	hsa-mir-485	-2.97666	-1.85871	-0.422338	-1.83575	0.505251	2.08184	0.116269	-1.00562	-0.713981	0.270992
	hsa-mir-556	-0.877126	-2.57532	0.997565	-0.00727865	-0.0906044	-3.56294	-3.53372	-0.572579	-0.724852	0.074542
	hsa-mir-125b-2	-1.29216	0.00964383	1.21996	-0.848356	-0.78559	2.46681	-0.696051	-1.19427	-0.740821	0.774123
	hsa-mir-199a-1	NA	-0.990356	0.997565	0.878079	-0.928194	NA	-2.01016	-0.567041	-0.747617	0.401958
	hsa-mir-3149	NA	NA	NA	-0.0812792	-1.97001	NA	2.15977	-1.41504	-0.748158	0.745705
	hsa-mir-1285-1	NA	NA	-1.00243	-0.759351	-0.970014	-0.562936	-0.01016	-0.736966	-0.748158	0.00615445
	hsa-mir-577	2.10543	1.61298	-1.32436	-1.57392	0.989962	-0.193702	-2.76505	-1.45829	-0.759033	0.612796
	hsa-mir-3199-1	-1.29216	NA	NA	-0.759351	-1.64809	1.02203	-0.747126	NA	-0.759351	0.210174
	hsa-mir-186	-1.31786	2.56172	-1.7027	0.47348	-0.593851	0.0620692	-1.22253	-0.943878	-0.768864	0.512864
	hsa-mir-3131	2.61473	-3.2866	-2.11791	-0.607348	0.201624	-1.28283	-0.0387291	-0.964376	-0.785862	0.303848
	hsa-mir-141	1.44525	-0.511703	0.175404	-0.313309	-1.13698	-5.66165	-1.4252	-1.07773	-0.794715	0.189466
	hsa-mir-488	NA	NA	NA	-3.56671	NA	1.52453	0.404878	-2	-0.797561	0.487254
	hsa-mir-218-1	0.7953	NA	-0.739401	-0.732384	-1.7412	-0.825971	-2.88463	-0.847997	-0.825971	0.056614
	hsa-mir-150	-0.570106	0.812479	-1.0849	-1.11855	-1.44934	8.26767	-5.78165	2.42975	-0.827501	0.898306
	hsa-mir-138-2	-2.29216	0.594606	NA	-0.82974	-4.55498	1.75899	-3.46959	0.584963	-0.82974	0.233408
	hsa-mir-206	1.21034	-1.31228	-1.00243	-0.846814	2.35191	NA	-1.40248	0.832636	-0.846814	0.966893
	hsa-mir-125a	-1.43177	-0.268866	1.56934	-2.60633	-1.791	2.82761	0.591281	-2.60302	-0.850318	0.532468
	hsa-mir-451	-0.933105	0.382346	-0.721186	-1.47898	-0.560666	-3.57995	-3.09265	-0.774362	-0.853733	0.0250193
	hsa-mir-106a	0.489196	-0.575319	0.930451	-2.64865	-0.28357	-1.14398	-2.63465	-1.3155	-0.859651	0.0943429
	hsa-mir-23b	0.1466	-0.00964383	0.455867	-0.992103	-1.13358	-2.1808	-0.727912	-1.15376	-0.860007	0.055416
	hsa-mir-598	-1.03164	-1.21452	-2.50069	-0.691805	-1.69561	0.74376	0.503015	-0.422468	-0.86172	0.07756
	hsa-mir-1538	NA	NA	NA	0.240649	-1.97001	NA	NA	NA	-0.864683	0.577383
	hsa-mir-372	NA	NA	NA	-0.945218	-0.0794255	1.31153	-0.870184	-2	-0.870184	0.400453
	hsa-mir-3139	NA	0.00964383	NA	-0.496317	-1.23305	-0.562936	-1.59512	-1.41504	-0.897992	0.0182401
	hsa-mir-767	NA	NA	NA	-2.08128	-1.64809	NA	7.907	-0.152003	-0.900045	0.695797
	hsa-mir-140	-1.81216	-1.09666	0.447001	-2.17946	-0.706401	2.00241	-1.68828	-0.403113	-0.901531	0.205274
	hsa-mir-196a-1	-1.11383	-1.06075	0.0299865	-0.0284729	-0.307404	-3.54705	-2.71727	-0.773173	-0.916959	0.0352824
	hsa-mir-194-2	0.775925	-1.06062	-3.95306	-0.786565	0.227473	-2.6414	-1.67647	-0.480482	-0.923592	0.0630445
	hsa-mir-99a	-1.26152	-2.01018	1.07993	-0.90043	0.93272	-0.988885	-2.81392	-0.122335	-0.944658	0.155143
	hsa-mir-192	-2.7129	-0.676519	-0.596659	-0.912058	-0.985526	-3.38659	-1.497	-0.919961	-0.952744	0.00517095
	hsa-mir-376a-2	NA	NA	NA	NA	NA	-1.56294	NA	-0.415037	-0.988987	0.334759
	hsa-mir-876	NA	-0.990356	NA	NA	-1.64809	-4.1479	1.15977	-0.63743	-0.990356	0.219087
	hsa-mir-887	-1.00837	-0.990356	-2.8986	-0.39494	0.165036	-3.23378	-3.63465	-0.830075	-0.999363	0.015838
	hsa-mir-3166	NA	NA	NA	NA	NA	NA	NA	-1	-1	NA
	hsa-mir-3194	-2.29216	NA	-1.00243	-2.75935	3.35191	NA	-1.01016	-0.263034	-1.0063	0.488371
	hsa-mir-375	-1.47418	-0.390404	0.785857	-1.31489	-5.67642	0.761293	-0.702083	-1.42565	-1.00849	0.144409
	hsa-mir-1262	0.56913	-2.06836	-0.668016	-0.506065	0.0420586	-2.11042	-2.74399	-1.45251	-1.06026	0.0295448
	hsa-mir-200c	2.08084	0.0574914	-0.282237	-1.31939	-1.3886	-2.48469	-0.878357	-1.25067	-1.06452	0.196948
	hsa-mir-3150	2.46272	-2.21275	-3.32436	-0.866266	-1.2628	2.77096	-2.40248	0.807355	-1.06453	0.5523
	hsa-mir-544b	-2.87713	NA	-0.00243493	-2.13786	0.726309	NA	NA	NA	-1.07015	0.298439
	hsa-mir-153-2	NA	NA	NA	-1.08128	-2.23305	-0.977974	0.98984	-2	-1.08128	0.135656
	hsa-mir-3183	-2.29216	NA	NA	-1.82974	-0.285516	-0.184425	NA	-1.09311	-1.09311	0.0520076
	hsa-mir-541	NA	NA	NA	-1.17439	0.979945	-1.1035	0.797195	-1.60768	-1.1035	0.480462
	hsa-mir-580	NA	NA	NA	NA	0.351914	-2.56294	NA	NA	-1.10551	0.58687
	hsa-mir-144	0.410981	-0.379594	-0.361977	-2.94249	-0.37286	-3.82503	-2.96908	-1.85249	-1.11604	0.0276913
	hsa-mir-411	-3.11072	-1.83835	-0.956631	0.193103	-0.165049	-2.05494	-1.08004	-1.19186	-1.13595	0.0112656
	hsa-mir-504	-0.0633445	-1.13475	-1.17236	-2.74286	-1.93824	1.26338	-0.283611	-3.47873	-1.15355	0.062683
	hsa-mir-136	-2.21273	-0.223017	-1.57072	-0.359654	0.264756	-2.79686	-1.94614	-0.745879	-1.1583	0.0169103
	hsa-mir-3164	NA	NA	NA	0.240649	NA	-2.56294	NA	NA	-1.16114	0.559601
	hsa-mir-190	-0.929593	-0.475783	-1.22483	-0.676889	-1.79104	-6.09543	-4.86814	-1.16993	-1.19738	0.0237114
	hsa-mir-376c	-1.89116	-0.17256	-2.71587	-0.684063	-0.095667	-4.18492	-1.74713	-0.5025	-1.21559	0.0208894
	hsa-mir-3158-1	NA	NA	NA	NA	-1.23305	NA	NA	NA	-1.23305	NA
	hsa-mir-30c-1	-0.292163	-0.990356	0.997565	-2.28291	-1.47816	0.787561	-1.72637	-1.67138	-1.23426	0.0937087
	hsa-mir-196a-2	2.04697	0.116559	-1.78153	-1.3926	-0.876602	-1.29295	-1.91758	-1.24204	-1.2675	0.13
	hsa-mir-3065	-2.81154	-1.109	-0.803126	-1.29925	-1.25194	-1.37367	-0.269601	-1.9293	-1.2756	0.00145033
	hsa-mir-548v	-1.29216	-1.57532	1.80492	0.747609	-1.71848	-0.656046	-3.18008	-1.26303	-1.2776	0.146566
	hsa-mir-143	-1.17062	-1.09368	-1.39063	-0.473412	-0.379924	-2.01782	-2.88244	-2.26378	-1.28063	0.00214888
	hsa-mir-520a	NA	NA	NA	NA	NA	-2.56294	-0.01016	NA	-1.28655	0.497476
	hsa-mir-378b	-1.29216	NA	-2.98333	-0.681629	-0.486095	-4.4634	-4.92664	-1.28951	-1.29216	0.0156438
	hsa-mir-574	-1.26091	-2.82374	0.660223	0.0120606	-1.38935	-0.715955	-3.57932	-1.72489	-1.32513	0.0286697
	hsa-mir-4289	NA	NA	NA	-1.34431	NA	NA	NA	NA	-1.34431	NA
	hsa-mir-218-2	NA	NA	NA	-3.45979	-1.34853	0.896495	-0.595122	-2.41504	-1.34853	0.137943
	hsa-mir-30c-2	-2.52217	-1.46311	0.284446	-2.65244	-0.726942	1.60985	-2.89913	-1.23816	-1.35063	0.0665281
	hsa-mir-139	-1.59172	-3.24274	-0.324363	-4.09297	-0.53654	0.833265	-1.64928	-1.14454	-1.36813	0.0346662
	hsa-mir-642	-5.75159	-0.0683587	-2.07282	-3.34431	-1.11587	1.43706	0.448131	-1.62449	-1.37018	0.103097
	hsa-mir-138-1	-4.61409	0.746609	-0.17236	-1.77265	-3.1435	-0.162057	-3.59512	-1	-1.38632	0.038218
	hsa-mir-1249	-3.29216	-1.57532	NA	0.655686	-1.23305	NA	2.98984	-1.73697	-1.40418	0.472663
	hsa-mir-559	NA	NA	-1.5874	-1.17439	-2.23305	-1.92551	-1.23255	-1.22239	-1.40997	0.000323501
	hsa-mir-3151	NA	NA	NA	0.240649	NA	NA	NA	-3.11548	-1.43741	0.549077
	hsa-mir-29c	-0.32143	0.0994808	-1.40051	-2.79993	-1.53988	-1.727	-3.53012	-1.08449	-1.4702	0.00825758
	hsa-mir-605	-1.29216	-0.253391	NA	-2.7891	-1.47121	-2.41093	-1.1097	-3.0199	-1.47121	0.00353528
	hsa-mir-378c	0.000618516	0.00964383	-3.03806	-1.65244	-1.3052	-6.85572	-5.43642	0.295456	-1.47882	0.0487747
	hsa-mir-10b	-1.74917	-4.9662	-0.685245	-1.15928	-0.745032	-4.68226	-1.34904	-3.58739	-1.54911	0.00690122
	hsa-mir-3152	-1.48481	NA	NA	-1.75935	NA	NA	NA	-1.58496	-1.58496	0.00247394
	hsa-mir-20b	-2.48481	-0.668428	3.457	-3.92354	-0.504223	-0.690397	-4.31394	-2.58496	-1.5876	0.138037
	hsa-mir-363	-3.31453	1.18549	1.12685	-4.46597	-0.681055	0.705123	-4.10111	-2.51469	-1.59787	0.115854
	hsa-mir-720	NA	NA	NA	-4.15167	-1.64809	-2.56294	-1.59512	-0.584963	-1.64809	0.0244567
	hsa-mir-561	NA	NA	2.457	1.24065	-0.385052	-3.1479	-2.91705	-3.5025	-1.65105	0.35836
	hsa-mir-130a	-1.98344	0.788403	0	-2.64705	-1.19372	-2.45327	-2.87252	-1.55064	-1.76704	0.0145143
	hsa-mir-378	-2.2728	-0.0544865	-2.98733	-0.480197	-1.57409	-5.55729	-5.19338	-1.1062	-1.92344	0.0130969
	hsa-mir-873	NA	-1.99036	-2.00243	-2.42232	-1.09875	-1.47547	2.25833	-2.24793	-1.99036	0.0818887
	hsa-mir-585	NA	NA	-2.32436	-2.19231	-1.5915	0.896495	NA	-2	-2	0.0732901
	hsa-mir-187	NA	-0.990356	NA	-3.56671	-3.09103	0.896495	4.7712	-3.20511	-2.04069	0.542828
	hsa-mir-497	-2.11939	-0.431529	-3.68009	-3.29638	-2.1385	-0.699067	-3.34038	-1.57823	-2.12895	0.00156636
	hsa-mir-133b	NA	NA	NA	-2.75935	-1.64809	-4.56294	-0.595122	NA	-2.20372	0.066745
	hsa-mir-1224	-5.02008	-1.33139	2.86106	-6.41279	-3.11624	1.07201	4.32619	-4.06333	-2.22381	0.322181
	hsa-mir-658	-2.7072	NA	-2.32436	-1.17439	0.159269	NA	-2.59512	-2.152	-2.23818	0.0103781
	hsa-mir-195	0.871123	-0.175337	-2.0407	-4.54304	-2.52283	-1.84931	-4.0924	-2.74844	-2.28177	0.0126514
	hsa-mir-135a-1	NA	NA	NA	-2.92928	-2.34853	NA	3.38216	-2.41504	-2.38178	0.522391
	hsa-mir-196b	3.43863	0.346737	-7.52835	-7.2523	-1.82692	-3.02227	-2.80772	-1.97493	-2.39132	0.0845522
	hsa-mir-3202-1	-3.29216	1.817	-1.22483	-2.56671	-4.0404	NA	-2.44312	1.5025	-2.44312	0.143353
	hsa-mir-129-2	-6.47916	-0.312284	-1.01679	-1.99068	-1.75475	-4.88898	-2.98257	-3.46279	-2.48663	0.00557043
	hsa-mir-1914	NA	NA	NA	NA	NA	-2.56294	NA	NA	-2.56294	NA
	hsa-mir-383	NA	NA	NA	-3.11523	-2.07435	-0.241008	NA	-3.24598	-2.59479	0.0522639
	hsa-mir-513c	NA	NA	NA	NA	NA	NA	-2.59512	NA	-2.59512	NA
	hsa-mir-422a	-2.65473	NA	-0.365005	-3.42232	-0.592945	NA	NA	-3.77259	-2.65473	0.0384314
	hsa-mir-129-1	-4.26944	-1.75589	1.03939	-3.12192	-2.30928	-4.83303	-1.48409	-3.61143	-2.7156	0.00622477
	hsa-mir-147b	-0.111225	-1.02484	-3.49886	-1.97753	-4.14113	-6.91416	-7.11868	-1.27563	-2.7382	0.0105098
	hsa-mir-551b	-2.11159	-4.16028	NA	-2.98174	-2.13683	-2.97797	1.38514	-2.82597	-2.82597	0.0141053
	hsa-mir-202	-3.87713	-0.990356	NA	NA	-1.71848	-3.56294	-2.81751	-4.13386	-3.19023	0.00263841
	hsa-mir-194-1	-0.419169	-1.85734	-5.57497	-4.78528	-1.12763	-3.51403	-4.73609	-3.0156	-3.26481	0.00211656
	hsa-mir-137	-3.29216	NA	NA	NA	-2.64809	-8.02237	5.11086	-3.27302	-3.27302	0.315906
	hsa-mir-145	-3.26745	-0.905537	-3.51906	-1.68966	-0.801962	-5.20471	-4.67505	-3.76559	-3.39326	0.00148905
	hsa-mir-2114	NA	NA	2.31949	NA	-3.97001	-3.78533	NA	NA	-3.78533	0.47304
	hsa-mir-1-2	-3.84202	-0.763179	-2.66427	-6.21757	-1.96321	-4.81928	-3.79729	-6.21865	-3.81965	0.000915391
	hsa-mir-215	-1.58496	-0.263788	-5.82145	-5.52768	-0.939782	-3.94805	-6.85431	-3.94647	-3.94726	0.00412737
	hsa-mir-1-1	-3.60475	0.780162	-3.11791	-6.01891	-1.37982	-6.8007	-4.78847	-6.43254	-4.19661	0.00409327
	hsa-mir-490	NA	-2.57532	NA	-6.86039	-2.66263	NA	NA	-7.3159	-4.76151	0.0330718
	hsa-mir-1265	NA	NA	NA	NA	NA	-7.0865	-3.46959	NA	-5.27804	0.210148

## Sheet: Table S6C
	Table S6C Complete lists of miRNAs detected in T/M. Analysis of 8 colorectal cancer patients using NGS technology delivered a range of malign tissue specific deregulated miRNAs.
	ID	P1	P2	P3	P4	P5	P6	P7	P8	median log2ratio	p-values
	hsa-mir-498	NA	NA	NA	NA	NA	NA	NA	NA	NA	NA
	hsa-mir-610	NA	NA	NA	NA	NA	NA	NA	NA	NA	NA
	hsa-mir-611	NA	NA	NA	NA	NA	NA	NA	NA	NA	NA
	hsa-mir-631	NA	NA	NA	NA	NA	NA	NA	NA	NA	NA
	hsa-mir-762	NA	NA	NA	NA	NA	NA	NA	NA	NA	NA
	hsa-mir-888	NA	NA	NA	NA	NA	NA	NA	NA	NA	NA
	hsa-mir-933	NA	NA	NA	NA	NA	NA	NA	NA	NA	NA
	hsa-mir-548f-1	NA	NA	NA	NA	NA	NA	NA	NA	NA	NA
	hsa-mir-1254	NA	NA	NA	NA	NA	NA	NA	NA	NA	NA
	hsa-mir-875	NA	NA	NA	NA	NA	NA	10.4417	NA	10.4417	NA
	hsa-mir-934	NA	NA	NA	4.16993	NA	NA	NA	NA	4.16993	NA
	hsa-mir-3153	NA	NA	NA	NA	NA	2.59412	4.30851	NA	3.45132	0.15498
	hsa-mir-122	6.76107	-0.666099	9.95063	12.3231	-7.60467	-4.96755	-1.61371	8.83124	3.04748	0.314015
	hsa-mir-1252	NA	NA	NA	NA	NA	NA	2.80037	NA	2.80037	NA
	hsa-mir-1246	-0.63743	NA	-3.80735	6.44915	2.70309	-1.40588	3.79803	5.86486	2.70309	0.254091
	hsa-mir-518c	NA	NA	NA	NA	NA	NA	2.63044	NA	2.63044	NA
	hsa-mir-184	3.33985	-0.125531	3.39232	1.69188	3.00265	3.451	0.83576	-0.70421	2.34727	0.0169499
	hsa-mir-937	NA	NA	NA	3.58496	NA	0.594123	2.30851	NA	2.30851	0.129965
	hsa-mir-615	NA	NA	0	NA	NA	2.25017	3.00895	NA	2.25017	0.191871
	hsa-mir-1224	-0.807355	1.45943	3.22607	-2.73697	2.90955	3.02262	5.84443	1.13116	2.18449	0.102698
	hsa-mir-204	5.58761	1.3599	2.2854	1.926	2.83224	2.05355	6.84035	-0.700525	2.16948	0.0134689
	hsa-mir-943	NA	NA	NA	2	NA	NA	NA	NA	2	NA
	hsa-mir-211	NA	NA	NA	NA	NA	NA	1.89348	NA	1.89348	NA
	hsa-mir-9-1	NA	NA	NA	NA	NA	NA	1.89348	NA	1.89348	NA
	hsa-mir-3154	NA	NA	NA	NA	-1.31927	5.07525	5.39598	-1.79167	1.87799	0.4179
	hsa-mir-3171	NA	NA	NA	NA	NA	NA	1.83903	NA	1.83903	NA
	hsa-mir-129-1	1	NA	5.12928	1.80735	2.84396	-1.96947	4.47844	-3.95394	1.80735	0.327574
	hsa-mir-3177	NA	NA	NA	-0.415037	NA	2.00916	2.11587	1.60064	1.8049	0.110459
	hsa-mir-1193	NA	NA	NA	1.58496	2.32458	NA	-2.49884	2.01568	1.80032	0.503086
	hsa-mir-765	NA	NA	NA	-3.32193	-2.31927	2.87706	2.30851	1.75265	1.75265	0.849266
	hsa-mir-1323	NA	NA	NA	-0.387023	2.22505	1.68723	2.69509	-0.984318	1.68723	0.225425
	hsa-mir-885	NA	NA	NA	4.12928	-8.90123	0.594123	2.76794	NA	1.68103	0.912183
	hsa-mir-3161	NA	NA	NA	NA	1.00265	NA	2.08612	NA	1.54439	0.214773
	hsa-mir-3144	1.22239	NA	1.74543	NA	NA	NA	3.19604	-1.74065	1.48391	0.364302
	hsa-mir-1259	-0.869296	-0.624337	1.08746	6.00785	2.11813	-3.03648	1.90504	1.85629	1.47187	0.302103
	hsa-mir-744	3.71245	-3.49586	0.0860954	1.26497	-1.61268	2.36654	2.08208	1.66397	1.46447	0.389672
	hsa-mir-150	1.58088	4.45341	2.67243	0.465343	-2.41922	6.51784	-2.75758	1.1503	1.36559	0.233316
	hsa-mir-99b	1.72603	-1.80822	1.77564	2.04733	-0.670269	0.780887	1.67137	1.0246	1.34799	0.134925
	hsa-mir-4325	NA	NA	NA	NA	NA	1.33109	NA	NA	1.33109	NA
	hsa-mir-1538	NA	NA	NA	NA	NA	1.33109	NA	NA	1.33109	NA
	hsa-mir-760	NA	-1.61738	-1	-0.807355	1.32458	2.71356	2.78798	1.71612	1.32458	0.334177
	hsa-mir-1226	1.32193	NA	NA	0	-0.997346	NA	2.30851	1.33761	1.32193	0.242174
	hsa-mir-153-1	NA	NA	NA	NA	NA	NA	1.30851	NA	1.30851	NA
	hsa-mir-891a	NA	NA	NA	NA	NA	NA	1.30851	NA	1.30851	NA
	hsa-mir-105-2	NA	NA	NA	NA	NA	NA	1.30851	NA	1.30851	NA
	hsa-mir-124-2	NA	NA	NA	NA	NA	NA	1.30851	NA	1.30851	NA
	hsa-mir-3196	NA	NA	NA	NA	NA	NA	1.30851	NA	1.30851	NA
	hsa-mir-767	NA	NA	NA	NA	NA	NA	1.98046	0.600644	1.29055	0.312536
	hsa-mir-466	NA	NA	NA	1.28011	1.81001	-0.668912	1.89348	0.0156816	1.28011	0.164559
	hsa-mir-1250	NA	-1.08489	0.222392	0.947533	1.20429	1.26789	2.5309	1.60064	1.20429	0.067893
	hsa-mir-146a	-0.843266	1.61027	0.607881	3.08106	-1.20728	1.80812	0.735226	2.05627	1.17275	0.0995131
	hsa-mir-7-2	0.378512	2.1375	-0.485427	1.05889	1.22505	-0.575803	2.33599	1.50111	1.14197	0.0447813
	hsa-mir-183	1.77541	-3.85992	1.11736	2.0618	2.00985	-0.227601	1.14886	-1.90013	1.13311	0.735591
	hsa-mir-1295	1.58496	-1.66985	3	5.35755	-7.45678	NA	0.630441	NA	1.1077	0.899435
	hsa-mir-484	1.6845	2.04897	-0.222392	0.450285	-1.72901	0.803069	1.3838	1.81566	1.09344	0.125974
	hsa-mir-100	1.52537	0.854619	1.30718	1.42553	-0.552731	-2.5424	-0.445086	2.23782	1.0809	0.415435
	hsa-mir-375	3.285	1.62292	2.67353	0.722232	-0.744613	1.41384	-1.4663	-4.23937	1.06804	0.653219
	hsa-mir-137	-1.58496	NA	NA	NA	1.58762	-2.99084	6.75146	1.01568	1.01568	0.598505
	hsa-mir-1975	0.931587	-2.00609	-0.121991	3.22434	0.288227	1.08141	2.25521	4.22032	1.0065	0.120287
	hsa-mir-653	1	0.722466	NA	0	1.46209	2.00916	0.823086	2.33761	1	0.00768545
	hsa-mir-3195	0.584963	NA	1	NA	NA	NA	NA	1.01568	1	0.0254612
	hsa-mir-1908	NA	NA	1	-1.58496	NA	NA	1.30851	NA	1	0.817235
	hsa-mir-216b	NA	1.72247	1	4.08746	-2.90005	-1.8913	-0.369559	3.18561	1	0.503647
	hsa-mir-636	NA	NA	NA	1	NA	NA	NA	NA	1	NA
	hsa-mir-3185	NA	NA	NA	1	NA	NA	NA	NA	1	NA
	hsa-mir-663	1.12928	-2.44746	0.847997	0.149747	-0.0462551	3.56375	1.85871	2.45309	0.98864	0.187575
	hsa-mir-2110	0.973033	-2.03242	0.957772	-1.5652	1.00265	4.21341	2.49294	-0.561863	0.965402	0.380302
	hsa-mir-1293	NA	NA	-1.87447	-1	1.00265	1.17909	0.893475	1.01568	0.948065	0.718822
	hsa-mir-588	NA	NA	NA	-1	NA	NA	2.89348	NA	0.946738	0.711838
	hsa-mir-1260	2	0.874469	1.44057	1	0.10957	2.0347	-0.498842	-1.25995	0.937235	0.131718
	hsa-mir-223	-0.529306	2.96091	-4.1521	1.77351	2.83921	0.068583	-3.15017	3.8687	0.921047	0.671984
	hsa-mir-1236	NA	NA	NA	NA	NA	NA	0.893475	NA	0.893475	NA
	hsa-mir-602	NA	NA	NA	NA	NA	NA	0.893475	NA	0.893475	NA
	hsa-mir-1248	-0.741266	1.1375	1.58496	4.10992	-0.0946427	0.220664	2.01746	0.647294	0.892399	0.075923
	hsa-mir-518b	NA	NA	NA	NA	NA	-0.99084	2.76794	NA	0.888552	0.718843
	hsa-mir-3127	1.61813	1.1375	0.63743	0.96408	0.810009	1.47731	-0.906081	-1.4674	0.887045	0.219575
	hsa-mir-185	0.828531	0.132462	-0.183888	-1.82544	1.53598	1.35591	0.971294	0.926034	0.877282	0.264399
	hsa-mir-488	NA	NA	NA	NA	NA	NA	3.30851	-1.56928	0.869616	0.781953
	hsa-mir-328	2	-1.44746	1.87447	1.1193	-1.91488	2.72964	0.618853	-0.420417	0.869076	0.371333
	hsa-mir-326	1.48543	2.94486	1	1.24936	-1.34527	0.672125	0.664656	0.667758	0.836063	0.0649995
	hsa-mir-1301	1.23704	-1.47322	0.423808	-0.881356	0.187079	3.34861	2.5907	2.32668	0.830423	0.152993
	hsa-mir-618	NA	0.137504	-0.192645	2.61471	-2.48277	0.816515	2.32049	4.18561	0.816515	0.248995
	hsa-mir-7-3	0.169925	NA	NA	1.45943	NA	-1.99084	5.99301	NA	0.814678	0.464963
	hsa-mir-30a	1.5575	0.83369	1.22985	0.789104	0.0147639	0.0329736	-1.61172	1.42359	0.811397	0.190744
	hsa-mir-214	0.735066	0.970394	1.0114	-1.17187	-1.13104	0.88427	-3.19135	0.907603	0.809668	0.828603
	hsa-mir-629	0.702614	-0.123148	-0.575502	0.906407	1.47583	1.8175	1.8181	-0.567103	0.804511	0.0961093
	hsa-mir-500b	0.222392	0.459432	NA	1.58496	2.06155	1.03891	-2.75038	0.804178	0.804178	0.439492
	hsa-mir-342	0.593794	1.74202	1.04749	-0.690465	-1.73961	2.88051	-2.37761	1.01191	0.802852	0.639132
	hsa-mir-1282	NA	NA	NA	0	NA	NA	NA	1.60064	0.800322	0.5
	hsa-mir-3124	1.32193	-1.44746	1.16993	-1	NA	1.33109	NA	0.430719	0.800322	0.576441
	hsa-mir-1297	NA	NA	NA	NA	0.00265445	1.59412	NA	NA	0.798388	0.49894
	hsa-mir-2114	1	NA	1.32193	NA	-4.58231	0.594123	NA	NA	0.797061	0.784953
	hsa-mir-125b-2	1	0.552541	1.80735	1.45943	-2.26038	1.71698	-0.297208	-0.234297	0.776271	0.366273
	hsa-mir-125a	1.22497	-0.953748	2.51386	-0.423873	-2.8238	2.00683	1.01647	0.511194	0.76383	0.550759
	hsa-mir-769	1.16008	-1.06761	0.557482	2.11911	-0.238354	0.37173	0.981348	0.956788	0.757135	0.11736
	hsa-mir-181d	1.1215	0.669431	3.08891	-0.197544	0.0264747	0.800411	1.68186	-0.29114	0.734921	0.067141
	hsa-mir-520d	NA	NA	NA	NA	NA	NA	0.72355	NA	0.72355	NA
	hsa-mir-584	1.52057	-3.30501	-3.15528	1.63833	2.09365	0.112736	0.284626	1.12455	0.704586	0.959771
	hsa-mir-181b-2	1.5025	5.17947	-0.238572	-0.34891	-1.40672	2.21434	-0.107835	2.54281	0.697333	0.164921
	hsa-mir-95	1.27302	-3.54549	0.420332	0.640973	2.86446	0.742886	-0.11297	1.07349	0.69193	0.536072
	hsa-mir-129-2	-2.19265	1.1375	4.05889	1.0126	3.0759	-1.5758	0.352907	-2.89859	0.682753	0.684339
	hsa-mir-3157	NA	NA	NA	0.678072	-0.412383	2.00916	NA	NA	0.678072	0.392014
	hsa-mir-181a-1	0.893085	0	1.1765	0.976501	-0.573263	3.24502	-0.950222	0.431962	0.662524	0.198105
	hsa-mir-3131	0.206451	-3.54982	1.58496	-1.5396	4.07733	1.09662	-2.12445	1.78827	0.651537	0.831969
	hsa-mir-125b-1	1.16993	0.635003	0.678072	0.2824	-1.87938	1.06903	0.663993	0.638612	0.651303	0.271202
	hsa-mir-1292	1	NA	0	-0.393342	0.640084	1.40148	0.276091	0.933219	0.640084	0.0586599
	hsa-mir-99a	1.31186	0.332595	2.97891	1.57151	-1.96787	-2.58522	-1.71104	0.943957	0.638276	0.880317
	hsa-mir-1274b	1.59495	1.50007	0.7176	-1.16089	-0.725433	0.594123	0.281032	0.646159	0.620141	0.24791
	hsa-mir-874	0.251539	-0.736966	1.26303	-0.10257	-1.65907	0.949217	1.03933	1.01568	0.600378	0.511505
	hsa-mir-532	0.380016	1.11482	0.621716	0.641309	0.578971	2.05229	-1.50502	-0.615633	0.600344	0.316693
	hsa-mir-3122	NA	NA	NA	NA	NA	0.594123	NA	NA	0.594123	NA
	hsa-mir-3150	2.75489	-0.599462	0	0.70044	0.680726	4.6061	-2.15092	0.501108	0.590917	0.30208
	hsa-mir-1260b	0.584963	NA	NA	1.58496	0.265689	0.594123	0.793939	-1.79167	0.589543	0.497292
	hsa-mir-579	1.41504	NA	0	-0.169925	0.587617	1.00916	0.671083	-0.206711	0.587617	0.0915472
	hsa-mir-886	NA	1.04439	-1.50696	0.584963	0.587617	1.30872	-2.29352	2.47511	0.587617	0.633448
	hsa-mir-1288	0.584963	NA	NA	0	NA	NA	2.30851	NA	0.584963	0.298523
	hsa-mir-3158-1	0.584963	NA	NA	NA	NA	NA	NA	NA	0.584963	NA
	hsa-mir-3193	1.5025	-3.8625	NA	0.584963	NA	NA	1.89348	-1.98432	0.584963	0.752191
	hsa-mir-92a-2	1	0.722466	-1.39689	1.29308	-0.780534	0.598124	0.567341	-0.991972	0.582733	0.736297
	hsa-mir-26a-1	-1.23447	2.59694	0.584963	0.559427	2.47514	-1.68366	0.171009	0.64795	0.572195	0.370696
	hsa-mir-373	NA	NA	NA	0.321928	1.32458	0.816515	-2.06072	NA	0.569222	0.901676
	hsa-mir-423	1.98089	-1.79015	-0.376539	0.401694	-0.816326	2.52738	1.87437	0.722001	0.561847	0.324756
	hsa-mir-1291	-0.263034	1.45943	3.03562	1.38606	-0.847598	2.7175	-1.74888	-0.912062	0.561512	0.37201
	hsa-mir-548b	NA	NA	-0.584963	0.736966	-1.41238	0.594123	2.89348	0.501108	0.547615	0.479122
	hsa-mir-589	2.03814	-1.98682	-1.12029	0.736966	-0.183358	0.578269	1.23355	0.514783	0.546526	0.63475
	hsa-let-7i	0.833133	1.30688	0.259886	1.81665	-0.242945	-0.0132255	-1.72901	0.924425	0.54651	0.343087
	hsa-mir-30e	0.72968	0.199519	0.69495	0.939377	0.39558	1.27205	-0.826464	0.284303	0.545265	0.0770485
	hsa-mir-499	2.3621	-1.03242	3.09516	-0.963124	-0.771954	0.484722	0.591915	0.797041	0.538318	0.326402
	hsa-mir-2277	1.80735	-1.8625	0.415037	1.79141	0.00265445	0.641428	1.30851	-0.877403	0.528233	0.407035
	hsa-mir-30b	0.705409	-1.21283	0.695419	2.52922	0.527745	0.505465	0.25038	-0.183927	0.516605	0.237981
	hsa-mir-1247	4.8857	-3.11042	0	0.455301	0.555864	4.14102	2.73709	-1.3372	0.505583	0.315079
	hsa-mir-432	0.909235	0.388047	-1	-2.36875	-0.174761	0.619277	0.692807	1.49495	0.503662	0.876994
	hsa-mir-203	2.21828	2.17539	-1.39834	1.3696	4.29739	-0.375453	-4.72588	-2.01815	0.497071	0.855327
	hsa-mir-449b	NA	NA	0.736966	1.45943	-0.090455	-0.253874	1.98311	0.252721	0.494843	0.119498
	hsa-mir-450b	0	-1.56294	1.1375	0.129283	0.511668	0.433658	0.821774	1.15864	0.472663	0.323164
	hsa-mir-34c	1.47876	-0.525461	0.476118	1.58257	0.233359	0.468592	-2.01866	1.20846	0.472355	0.417694
	hsa-mir-449c	4.32193	NA	NA	-0.152003	-0.26038	1.03563	2.17812	-0.097529	0.469052	0.173774
	hsa-mir-128-2	NA	NA	0	0.125531	-1.89781	0.926698	2.21925	0.804178	0.464854	0.542339
	hsa-mir-148b	1.70016	-1.64419	0.252131	2.18523	-0.260937	1.03761	0.648816	0.234722	0.450474	0.256668
	hsa-mir-1826	-0.138828	-4.1338	0.120294	1.82236	-1.07245	0.749192	0.87411	2.8932	0.434743	0.85714
	hsa-mir-182	0.761749	-7.07682	0.104337	2.99559	2.63492	-0.467278	1.11182	-2.03299	0.433043	0.83403
	hsa-mir-664	0.917086	0.627928	1.77936	0.237083	-0.891822	0.729501	-0.677567	-2.17589	0.432506	0.881718
	hsa-mir-199a-2	0.192645	2.32685	1	0.669383	-0.244158	-0.0880891	-1.39193	0.8273	0.431014	0.318802
	hsa-mir-30c-2	1.16993	0.0242929	2.47131	-0.836501	-2.93946	1.64945	-1.37954	0.833478	0.428886	0.848696
	hsa-mir-30d	1.966	-3.10291	0.0208692	0.45828	1.61164	0.815711	0.39767	0.100758	0.427975	0.6175
	hsa-mir-483	-1.4975	0.359896	1.30666	-2.4411	-5.07315	0.600436	0.495598	3.76645	0.427747	0.751708
	hsa-mir-132	0.268489	0.58111	-0.0703893	-0.704692	-0.989483	0.819082	0.993258	1.62301	0.4248	0.343594
	hsa-mir-651	-0.830075	0.42701	0	0.662965	0.533169	0.7096	0.019006	0.41778	0.422395	0.21875
	hsa-mir-1537	0.321928	0.722466	-1.58496	2.11548	0.0470486	0.51166	-1.93941	1.20011	0.416794	0.726571
	hsa-mir-4326	NA	NA	NA	0.823122	NA	0.00916	1.11587	-0.399356	0.416141	0.351093
	hsa-mir-2355	0.691878	1.72247	0.0848889	1.28157	-0.117085	0.139359	-0.72864	0.834235	0.415618	0.126493
	hsa-mir-148a	0.976548	2.67755	1.38726	2.35214	-0.616762	-0.148987	-0.960776	-0.249019	0.413781	0.207197
	hsa-mir-708	-2.33238	3.71612	0.793549	-0.921343	2.46973	0.0237898	-2.51767	1.24992	0.408669	0.702236
	hsa-mir-181c	0.824913	-0.925232	3.42146	0.600257	-0.26915	0.209653	0.850701	-0.908252	0.404955	0.364356
	hsa-mir-3065	-0.900464	0.944858	-0.367732	0.327262	0.6889	-0.317491	0.482211	1.00319	0.404736	0.371769
	hsa-mir-146b	0.375852	3.14388	-0.455849	1.75819	0.424339	-0.552194	0.353725	3.91847	0.400095	0.0974444
	hsa-mir-503	2.79774	-3.39351	0.198226	-1.6444	-0.649841	0.577298	0.593975	1.55043	0.387762	0.995741
	hsa-mir-551a	0	NA	-2.1375	1.58496	-0.149349	0.387672	0.72355	2.01568	0.387672	0.523676
	hsa-mir-25	1.41776	-0.996461	0.509793	-0.567083	-0.667722	1.26157	1.17512	0.261752	0.385772	0.403702
	hsa-mir-221	1.41152	0.0325762	-0.556597	0.970988	1.23723	0.226665	0.533392	-0.0260853	0.380028	0.0884419
	hsa-mir-1180	0.485427	-2.09954	-2	-0.869939	1.32458	1.156	1.16412	0.238074	0.36175	0.88417
	hsa-mir-34a	0.587414	0.645107	0.133267	0.632128	1.17786	-0.568342	-2.12961	-0.0964541	0.36034	0.899457
	hsa-mir-103-2	0.975675	5.20494	0.532819	-0.0491267	-0.375138	0.0304823	0.277597	0.420417	0.349007	0.209527
	hsa-mir-1249	NA	-1.8625	NA	1.26303	-2.69779	1.54521	4.04548	-0.569281	0.346877	0.788495
	hsa-mir-103-1	0.472068	1.24442	-0.169925	0.696487	0.868294	-1.18849	0.214646	-0.482772	0.343357	0.484023
	hsa-mir-33a	0.653399	-1.13804	0.654087	0.367929	1.4894	0.313435	-1.1536	-1.64286	0.340682	0.888429
	hsa-mir-1275	NA	NA	NA	0.540568	0.324583	3.79343	-1.71386	0.141213	0.324583	0.526158
	hsa-mir-585	-1	NA	NA	0.321928	0.381166	2.46859	NA	-0.569281	0.321928	0.620457
	hsa-mir-549	0.321928	NA	1	1.70044	2.00265	-0.99084	0.308513	-0.721284	0.321928	0.273228
	hsa-mir-642	NA	0.722466	0.321928	-0.610053	-0.690684	1.14243	0.373889	-1.50788	0.321928	0.922994
	hsa-mir-365-1	1.72247	1.45943	-0.440573	0.709221	-0.360936	0.168359	-0.0515309	0.475113	0.321736	0.148016
	hsa-mir-155	-0.286881	3.21979	-0.473776	0.329136	0.3045	2.63976	-1.38696	2.75807	0.316818	0.190948
	hsa-let-7e	0.163634	-0.357956	0.456398	-0.394085	-0.984063	0.81726	2.79159	0.615383	0.310016	0.36772
	hsa-mir-202	-3	NA	NA	NA	1.32458	-1.99084	0.308513	0.600644	0.308513	0.541058
	hsa-mir-3128	1.58496	-3.94996	NA	1	-0.997346	0.231552	0.308513	1.01568	0.308513	0.876473
	hsa-mir-523	NA	NA	NA	NA	NA	NA	0.308513	NA	0.308513	NA
	hsa-mir-3130-2	NA	NA	NA	NA	NA	-0.99084	0.308513	0.600644	0.308513	0.960669
	hsa-mir-3137	NA	NA	NA	NA	NA	NA	0.308513	NA	0.308513	NA
	hsa-mir-3176	NA	-0.862496	-1	0.234465	2.75754	0.331088	0.308513	1.33761	0.308513	0.398521
	hsa-mir-105-1	NA	NA	NA	NA	NA	NA	0.308513	NA	0.308513	NA
	hsa-mir-198	NA	NA	NA	NA	NA	NA	0.308513	NA	0.308513	NA
	hsa-mir-520g	NA	NA	NA	NA	NA	NA	0.308513	NA	0.308513	NA
	hsa-mir-555	NA	NA	NA	NA	NA	NA	0.308513	NA	0.308513	NA
	hsa-mir-596	NA	NA	NA	NA	NA	NA	0.308513	NA	0.308513	NA
	hsa-mir-657	NA	NA	NA	NA	NA	NA	0.308513	NA	0.308513	NA
	hsa-mir-1225	NA	NA	NA	NA	NA	NA	0.308513	NA	0.308513	NA
	hsa-mir-663b	NA	NA	NA	NA	NA	NA	0.308513	NA	0.308513	NA
	hsa-mir-3198	NA	NA	NA	NA	NA	NA	0.308513	NA	0.308513	NA
	hsa-mir-877	1.36375	0.059501	0.115477	-0.705056	0.458185	1.12059	0.637672	0.149433	0.303809	0.127028
	hsa-mir-139	0.378512	-1.34489	1	-1.56242	0.225047	1.17909	0.130725	2.0064	0.301779	0.577188
	hsa-mir-601	NA	NA	NA	1.58496	-0.997346	NA	NA	NA	0.293808	0.85756
	hsa-let-7a-3	0.695994	1.1375	0.449927	0.137381	0.48704	-0.00723444	0	-6.11143e-05	0.293654	0.0414635
	hsa-mir-335	-0.19237	-1.58821	2.20716	0.610796	-0.716256	1.01373	0.906384	-0.0462506	0.282273	0.528042
	hsa-mir-493	1.02385	-1.5943	-1.23266	0.0102319	1.99287	0.547974	-0.134507	2.69028	0.279103	0.45503
	hsa-mir-548n	1.16993	-2.18442	-1.32193	0.222392	1.81001	0.331088	0.42399	-0.325355	0.27674	0.973432
	hsa-mir-197	1.56533	-0.816693	0.301656	0.487497	0.250902	1.54219	-0.82459	-0.244286	0.276279	0.415829
	hsa-mir-1287	1.926	-2.03242	1.074	0	-1.31927	-0.295695	0.542978	1.67865	0.271489	0.701824
	hsa-mir-199b	-0.941106	1.72825	0.196397	-1.42899	1.89559	-2.33043	0.343641	1.79215	0.270019	0.790544
	hsa-mir-320c-1	0.263034	NA	1.34104	-0.257158	0.417692	1.82792	-0.498842	-1.33796	0.263034	0.562823
	hsa-mir-940	4.61471	0.509472	-1	0.796955	0.729636	-0.253874	-0.67334	0.0156816	0.262577	0.370176
	hsa-mir-26b	0.241529	0.872979	0.444597	-0.887017	0.281153	0.393893	-0.161365	-0.0115696	0.261341	0.450912
	hsa-mir-296	NA	-1.66985	NA	0.62842	-0.11599	1.85046	1.2123	-2.44375	0.256215	0.900663
	hsa-mir-376b	-2.48981	1.80047	-0.378512	0.74366	0.85929	-1.5679	-0.239924	2.33761	0.251868	0.824471
	hsa-mir-29b-1	-2.66626	0.9855	-1.11548	-0.517399	2.09663	1.20181	-2.16953	2.59592	0.234051	0.942913
	hsa-mir-627	-2	0.722466	NA	1.22239	1.00265	0.231552	-0.27645	-0.984318	0.231552	0.979683
	hsa-let-7g	1.7522	0.317766	0.662969	2.88182	-1.2523	0.0875866	-0.854659	0.141981	0.229874	0.355624
	hsa-mir-301b	0.222392	-1.8625	NA	-0.793549	1.70309	-1.21323	1.2596	0.530255	0.222392	0.966161
	hsa-mir-873	NA	-3.32193	-2	1	1.90955	-0.99084	1.51287	0.208327	0.208327	0.754319
	hsa-mir-126	-0.253874	1.63647	0.221009	0.455082	-0.914591	0.177788	-1.60985	0.853995	0.199398	0.848635
	hsa-mir-339	1.69032	-1.71397	0.0780025	0.308872	-0.706114	1.10048	1.18027	-0.420087	0.193437	0.648416
	hsa-mir-7-1	0.106128	0.267564	-0.557218	0.36804	0.666787	-0.451054	0.650371	-0.430834	0.186846	0.673316
	hsa-mir-1262	0.393145	-0.152003	0.688056	0.975752	2.00265	-1.87536	-0.0259065	-2.42988	0.183619	0.921426
	hsa-mir-151	1.61025	-1.8206	0.937023	2.22509	-0.908815	-0.185522	0.547498	-0.808578	0.180988	0.693709
	hsa-mir-659	1.70044	-1.27753	0.777608	1.19794	-1.76786	0.850462	-1.76188	-0.424891	0.176358	0.863176
	hsa-mir-598	1.0906	-2.54367	0.736966	0.0833621	-1.86363	1.30928	0.0422742	0.260599	0.171981	0.827501
	hsa-mir-370	0.169925	NA	-0.192645	0	0.324583	1.07955	-0.922813	1.60064	0.169925	0.385178
	hsa-mir-639	0	NA	NA	3	NA	NA	-1.27645	0.33761	0.168805	0.606363
	hsa-mir-766	-0.886789	5.49506	1.34395	0.300124	-0.916727	2.74613	-0.180526	0.0372148	0.168669	0.239816
	hsa-mir-433	-0.415037	0.104337	0.695994	-1.27501	-0.414903	1.00075	0.232341	0.873663	0.168339	0.725203
	hsa-mir-365-2	-0.0458037	0.437064	0.08092	-0.158429	0.250582	1.63245	-1.12584	0.583096	0.165751	0.47581
	hsa-mir-1468	NA	-0.447459	1.80735	3.16993	-3.31927	0.774695	NA	-0.984318	0.163618	0.864653
	hsa-mir-509-3	1.32193	-1.66985	2	-0.584963	0.909545	1.05435	-3.64568	-4.4982	0.162291	0.479822
	hsa-mir-3187	1.32193	NA	NA	-2.58496	-0.997346	2.17909	NA	NA	0.162291	0.986253
	hsa-mir-3121	NA	0.137504	0	-1.16993	NA	1.53272	0.598019	0.185607	0.161555	0.576504
	hsa-mir-654	0.228269	0.47854	-1	0.356392	-0.168506	0.084014	0.0079338	2.72682	0.156141	0.398167
	hsa-mir-346	NA	NA	NA	1.58496	NA	NA	-1.27645	NA	0.154256	0.931625
	hsa-mir-1306	1.58496	-1.81669	-0.203533	0.0489096	-0.141735	0.777152	0.594564	0.248881	0.148895	0.705698
	hsa-mir-340	0.121312	7.6661	0.0998761	-0.263852	-1.18237	0.175017	0.679652	1.98542	0.148164	0.275716
	hsa-mir-218-2	NA	NA	NA	0	NA	0.146664	1.30851	NA	0.146664	0.361933
	hsa-mir-222	-0.0675372	0.397926	-0.586075	-0.103946	1.49923	0.535643	0.157149	0.12741	0.14228	0.294066
	hsa-mir-380	-1.16993	0.722466	NA	1.48543	0.140158	-3.31277	-0.539484	1.82304	0.140158	0.861057
	hsa-mir-19b-2	-1.68589	0.722466	NA	0.584963	1.32458	-0.99084	NA	-0.306246	0.139358	0.905008
	hsa-mir-3162	NA	NA	-2.58496	NA	NA	2.17909	0.138588	NA	0.138588	0.954394
	hsa-mir-758	-2	0.137504	0	1.71621	0.462086	-0.768448	2.47844	NA	0.137504	0.625761
	hsa-mir-96	1.46345	-2.29948	-0.317482	0.572081	1.92573	-0.686155	0.908774	-1.01112	0.1273	0.892817
	hsa-mir-212	0.253757	0.54276	-0.0911479	-0.743583	-0.0264919	-0.008542	1.59358	1.13233	0.122607	0.247212
	hsa-mir-486	0.807355	0.137504	1.80735	0.106915	-1.60503	4.08241	-0.806965	-0.67021	0.122209	0.4708
	hsa-mir-1286	NA	NA	-1.32193	0.222392	0.00265445	0.774695	1.30851	0.0156816	0.119037	0.664364
	hsa-mir-190b	0	NA	-2.43296	0.847997	0.118132	0.201805	-2.21505	1.09368	0.118132	0.546874
	hsa-mir-92a-1	1.67145	-0.984487	-0.192645	0.410933	-1.84502	1.16483	0.735114	-0.651963	0.109144	0.928779
	hsa-mir-3190	0.321928	0.137504	0.584963	-0.906891	0.080657	0.00916	-0.369559	0.716121	0.10908	0.708666
	hsa-mir-543	-1.44746	-0.150073	0.216318	-2.62182	0	1.82248	0.416916	2.0561	0.108159	0.948577
	hsa-mir-196a-1	0.61891	1.45943	-0.402965	-0.604152	4.96933	0.859265	-2.53077	-0.923264	0.107973	0.598906
	hsa-mir-3140	-2.32193	0.400538	-1	1.28951	-0.26038	0.205557	0.00365799	0.600644	0.104608	0.739157
	hsa-mir-3188	0.0703893	0.137504	NA	-0.584963	NA	0.816515	-1.01342	3.01568	0.103946	0.515565
	hsa-mir-24-2	0.519374	-0.148801	0.353637	1.62541	1.03052	-0.988429	-1.36829	-1.05237	0.102418	0.992662
	hsa-mir-500	-0.0167174	-0.872765	0.221027	1.10465	0.751711	0.286536	-2.46264	-0.299122	0.102155	0.694049
	hsa-mir-181b-1	0.253757	1.80047	-1.04731	-0.0608822	-1.5098	2.05448	-1.21217	0.952946	0.0964372	0.759515
	hsa-mir-345	1.69561	2.48665	0.7507	-0.329545	0.341416	-0.153599	-0.533643	-0.847792	0.0939086	0.333285
	hsa-mir-660	-0.0909688	0.359896	0.0985638	0.0391706	0.678876	0.899009	-1.84252	0.0780018	0.0882828	0.927883
	hsa-mir-2276	2.32193	NA	0	-1.80735	0.172579	-1.99084	0.308513	NA	0.0862897	0.80806
	hsa-mir-1289-1	0.584963	NA	NA	-0.415037	NA	NA	NA	NA	0.0849625	0.892846
	hsa-mir-1976	0.830075	0.137504	-0.415037	1.32193	-0.997346	0.857157	-0.691487	0.0156816	0.0765926	0.661566
	hsa-mir-128-1	2.27657	-2.71649	-0.401617	-0.786756	-1.57059	0.539231	1.98302	1.9787	0.0688069	0.809767
	hsa-mir-376a-1	-2.11548	0.137504	0	1	1.00265	-0.99084	-1.15092	0.33761	0.0687518	0.586416
	hsa-mir-3126	0	0.137504	NA	-1	1.00265	-2.31277	NA	1.60064	0.0687518	0.874581
	hsa-mir-582	-0.799087	0.315841	-0.197037	0.488286	0.785556	-0.928779	0.659587	-0.456806	0.059402	0.946191
	hsa-mir-27a	0.478377	-2.44311	0.0333372	0.143954	2.03204	-0.354501	0.0792224	-0.626693	0.0562798	0.857005
	hsa-let-7f-1	0.161681	1.03869	0.138447	0.779312	-0.0509835	-0.204899	-1.44941	-0.157155	0.0437316	0.906931
	hsa-mir-505	-0.26984	0.991653	1.05889	-0.995907	-0.678168	1.41064	0.357117	-0.346888	0.0436387	0.564185
	hsa-mir-3165	0	NA	NA	1.41504	0.587617	-0.99084	0.0861201	-0.498892	0.0430601	0.782572
	hsa-mir-542	1.81097	-0.290178	0.0843922	-0.0257631	-0.42815	0	0.373283	1.52402	0.0421961	0.236657
	hsa-mir-491	0.49304	-0.0551416	0.137504	1.1635	0.310777	-1.53627	-2.24948	-2.20671	0.041181	0.323523
	hsa-mir-224	-0.0983651	0.733871	0.179772	0.506537	2.13311	-0.142055	-0.525196	-1.86611	0.0407034	0.782862
	hsa-mir-331	1.16993	-0.649351	1.33949	-0.149308	0.542529	0.0789054	-0.00996272	-0.733443	0.0344713	0.488349
	hsa-mir-19a	-1.45747	-2.40998	-1.078	0.92785	0.204288	-0.136691	0.893475	0.752647	0.0337987	0.531386
	hsa-mir-590	-1.32971	2.17703	0.0565835	-0.161967	1.02283	0.562758	-0.98377	0	0.0282918	0.681801
	hsa-mir-374b	-2.00214	0.130901	-0.69714	0.58791	0.667676	-0.0834491	-0.841019	0.41718	0.0237259	0.501645
	hsa-mir-576	-0.954196	0.359896	0	0.602665	0.0324018	-1.87016	-0.343564	0.539244	0.0162009	0.515371
	hsa-mir-3138	NA	-0.277534	0.263034	-1.80735	0.324583	2.53272	-0.0134155	0.0156816	0.0156816	0.76906
	hsa-mir-3183	NA	NA	0	-0.678072	2.17258	1.38767	NA	0.0156816	0.0156816	0.328202
	hsa-mir-668	NA	0.137504	NA	-1	NA	2.59412	-2.69149	0.0156816	0.0156816	0.837072
	hsa-mir-133a-2	NA	NA	NA	NA	NA	NA	NA	0.0156816	0.0156816	NA
	hsa-mir-1281	NA	NA	NA	NA	NA	NA	NA	0.0156816	0.0156816	NA
	hsa-mir-2861	NA	NA	NA	NA	NA	NA	NA	0.0156816	0.0156816	NA
	hsa-mir-3135	NA	NA	NA	NA	-0.997346	NA	NA	1.01568	0.00916804	0.994201
	hsa-mir-3170	1	NA	1	NA	-2.58231	0.00916	NA	-1.56928	0.00916	0.581073
	hsa-mir-580	NA	NA	NA	NA	NA	0.00916	NA	NA	0.00916	NA
	hsa-mir-616	NA	-0.862496	NA	NA	0.587617	0.00916	1.30851	-0.984318	0.00916	0.9798
	hsa-mir-3197	NA	NA	NA	NA	NA	0.00916	NA	NA	0.00916	NA
	hsa-mir-548a-3	NA	NA	0	NA	NA	0.00916	2.63044	NA	0.00916	0.420643
	hsa-mir-1273c	NA	NA	NA	0	NA	NA	NA	0.0156816	0.00784081	0.5
	hsa-mir-28	0.687227	0.0197041	1.07845	2.08817	-0.00614599	-0.612998	-1.01799	-1.13001	0.00677903	0.733537
	hsa-mir-489	NA	NA	NA	-0.584963	0.00265445	1.16116	-1.58457	0.0156816	0.00265445	0.681036
	hsa-mir-637	NA	NA	0	0	0.00265445	1.00916	0.308513	NA	0.00265445	0.248278
	hsa-mir-149	3.72792	NA	0	2.64386	-2.31927	-1.21323	3.30851	-0.569281	0	0.413469
	hsa-mir-1256	-2	NA	NA	0	-0.997346	NA	1.89348	1.01568	0	0.980919
	hsa-mir-3115	0	NA	NA	-1	1.00265	-3.31277	0.308513	NA	0	0.468729
	hsa-mir-658	NA	NA	0	0	NA	2.91605	-1.69149	-0.984318	0	0.954124
	hsa-mir-3192	NA	-2.66985	0	-1.1375	0.417692	2.8918	-0.0699991	0.863679	0	0.950207
	hsa-mir-374a	-1.22526	-0.859648	-0.0661523	0.870584	-0.312963	0.204416	0.0621549	0.457811	-0.00199872	0.666215
	hsa-mir-379	-0.467779	-0.326777	-0.741266	0.485927	1.78317	0.129673	-0.145519	1.53924	-0.00792313	0.419612
	hsa-mir-1185-2	-0.584963	0.137504	-1.12553	-0.163499	1.25058	-1.6789	0.893475	0.600644	-0.0129976	0.821096
	hsa-mir-92b	0.827066	-2.14922	-0.155164	-0.777841	0.3807	0.118252	-1.0485	0.403033	-0.0184564	0.411932
	hsa-mir-16-2	-0.164631	0.118888	-0.882643	1.15897	-1.35678	0.581802	-0.569581	0.226951	-0.0228714	0.710951
	hsa-mir-10a	1.12411	-3.48773	1.53186	-0.173137	0.123264	-1.1312	0.557738	-3.33081	-0.0249366	0.405987
	hsa-mir-143	-0.31574	0.0898011	-0.149773	2.51094	1.69399	-2.62282	-2.51399	0.847567	-0.0299862	0.931307
	hsa-mir-34b	-2.05445	NA	-0.530515	0.70044	0.503083	-0.0339087	-3.39193	1.7657	-0.0339087	0.537452
	hsa-mir-424	0.120899	0.398115	0.505674	-0.198127	-1.72102	-1.42676	-1.48139	1.0214	-0.0386139	0.380752
	hsa-mir-381	-1.08746	0.584963	0.106915	-0.189825	-0.658544	-0.936392	0.131635	0.878178	-0.0414547	0.57674
	hsa-mir-548l	0.0995357	-0.0848889	0	-0.75336	-0.743589	-0.183485	1.30851	0.481345	-0.0424444	0.949395
	hsa-mir-154	-1.62149	-0.0144996	-0.0780025	0.320135	-0.889286	-0.654973	0.149034	1.86003	-0.046251	0.757619
	hsa-mir-944	-0.514573	3.45943	0.5025	0.415037	-1.23835	-0.516909	-2.79582	0.848572	-0.0497678	0.975988
	hsa-mir-1277	-0.0331669	-1.33198	-0.0874628	-0.777608	-0.543834	0.949781	0.308513	1.24715	-0.0603149	0.915574
	hsa-mir-485	1	-0.544756	-0.165586	-1.76374	0.0299045	1.06897	-0.219339	1.45344	-0.0678408	0.779825
	hsa-mir-193b	-1.21288	2	-0.118181	2.33136	-1.23024	0.17197	-0.358728	-0.0193504	-0.0687659	0.688918
	hsa-mir-409	0	-0.144532	-0.198329	1.48383	1.02106	-0.913195	-0.596053	1.69647	-0.0722659	0.423375
	hsa-mir-539	-2.78136	2.60699	-1.32193	-1.40439	0.447136	-0.605718	1.97876	3.44345	-0.0792912	0.715453
	hsa-mir-23a	-0.558927	0.566413	0.398707	0.628733	0.601367	-1.4707	-1.57824	-1.27258	-0.0801098	0.371496
	hsa-mir-200a	1.8805	-0.891506	0.7261	0.96702	2.32982	-1.35803	-1.82327	-2.47402	-0.0827033	0.902516
	hsa-mir-361	0.0289237	-0.324134	0.278057	0.23893	-0.484394	-0.228356	-0.198296	0.484935	-0.0846864	0.836506
	hsa-mir-671	0.0238467	-0.157952	-0.415037	0.76184	1.67822	-1.47878	-0.0190621	-0.538254	-0.0885072	0.957579
	hsa-mir-497	-0.017403	1.00675	0.667425	-2.01508	-1.41548	0.802565	-1.13077	-0.161132	-0.0892673	0.499307
	hsa-mir-3136	-0.234465	-1.97797	-0.777608	0.415037	-0.845342	0.459821	0.0454782	0.908766	-0.0944935	0.468448
	hsa-mir-495	-1.96941	1.38712	-0.395485	-1.51625	0.207868	-0.645917	0.200765	1.17931	-0.0973597	0.657682
	hsa-mir-1307	2.00411	-3.14671	0.131245	-0.336298	-0.364867	0.886664	-0.363025	0.582081	-0.102527	0.889044
	hsa-let-7a-1	0.796692	0.580213	1.26364	-0.249314	-1.73696	-0.374237	0.0420595	-0.600888	-0.103627	0.919134
	hsa-mir-516b-1	NA	NA	NA	NA	NA	-1.99084	-0.106525	0.0156816	-0.106525	0.397186
	hsa-mir-1298	NA	NA	NA	NA	NA	NA	-0.106525	NA	-0.106525	NA
	hsa-mir-320a	0.166906	0.047708	0.645191	-0.612156	-0.959827	1.45124	-0.280334	-0.438486	-0.116313	0.992815
	hsa-mir-320c-2	0.0824622	0.9855	1.59826	-0.330645	-0.788759	1.96758	-0.337204	-1.75961	-0.124092	0.702409
	hsa-mir-382	-0.258233	0.146382	-0.00483315	-0.362094	1.21803	-1.05237	-0.964506	1.48523	-0.131533	0.93873
	hsa-mir-942	-1.51457	0.137504	-2.16993	-1.16227	0.946071	1.7096	-0.407694	0.966772	-0.135095	0.709857
	hsa-mir-454	-0.68966	0.874469	-3	0.369234	-0.525277	-0.221453	-0.0499414	1.37183	-0.135697	0.631018
	hsa-mir-3159	0	NA	NA	-1.58496	-1.58231	1.81651	-0.27645	1.23807	-0.138225	0.914502
	hsa-mir-548k	-0.530515	0.590016	-0.469485	0.948775	-0.185612	-0.120123	-0.0607212	-0.157966	-0.139045	0.992346
	hsa-mir-142	-0.357233	4.4803	-0.475205	-0.126464	-0.157524	3.55095	-2.35466	1.23834	-0.141994	0.395738
	hsa-mir-369	-1.9349	1.08504	-0.685364	-0.558683	0.0242845	-0.309422	0.305015	1.35259	-0.142569	0.814312
	hsa-mir-15b	0.296119	0.222585	-2.09001	-0.353666	-1.23201	1.44857	-1.86361	0.0604972	-0.146584	0.337542
	hsa-mir-21	-0.532029	1.1559	0.332846	1.12648	-0.180928	-0.332564	-0.117833	-0.190887	-0.149381	0.517332
	hsa-mir-643	0	-0.862496	0.125531	0.444785	-1.17792	-0.318415	0.952369	-0.984318	-0.159207	0.417541
	hsa-mir-3194	-1.41504	-0.862496	NA	0	-0.319274	2.59412	0.893475	NA	-0.159637	0.809558
	hsa-mir-1284	-2	1.1375	NA	-2.32193	0.587617	-0.138939	-0.160973	-0.858787	-0.160973	0.309195
	hsa-mir-101-2	-0.0438748	-0.279815	1.2046	3.11325	-2.08489	1.24938	-1.94978	-1.10686	-0.161845	0.984392
	hsa-let-7b	0.994753	0.313313	0.967906	-0.817888	-1.06838	0.94725	-0.916102	-0.63736	-0.162023	0.93627
	hsa-let-7c	0.696095	-0.15839	1.72012	-0.464371	-2.59252	-0.178934	-0.886366	0.283514	-0.168662	0.669034
	hsa-mir-3074	0.657942	-1.01801	0.119945	-1.35397	1.2563	0.252668	-0.457884	-1.85764	-0.168969	0.450548
	hsa-mir-501	-1.22707	0.785202	-0.355095	0.91407	0.85555	-0.672207	-2.46126	0.0156816	-0.169707	0.540949
	hsa-mir-320b-1	NA	2.1375	1.1375	-0.169925	-0.286852	-0.349294	0.102062	-1.16489	-0.169925	0.644342
	hsa-mir-26a-2	-0.745995	5.28725	0.40691	-0.0262657	-0.701213	-0.0384771	-0.305429	-1.17201	-0.171953	0.656683
	hsa-mir-200b	0.614057	-0.400099	1.10811	0.0309741	2.55367	-1.21968	-1.95838	-2.74119	-0.184562	0.690849
	hsa-mir-98	-0.0871547	0.673556	-0.319154	1.9134	-0.285156	-1.39564	-1.39757	1.72387	-0.186155	0.823154
	hsa-mir-3200	1.72247	0.944858	-0.378512	0	1.26569	-1.02881	-0.375014	-1.37664	-0.187507	0.812328
	hsa-mir-496	-0.678072	-1.18442	-1.32193	0.610053	0.302215	-1.75637	0.671083	3.26361	-0.187929	0.984184
	hsa-mir-1271	-0.308122	-0.103505	0.758992	-0.281771	-1.73127	1.19864	-1.01342	0.767754	-0.192638	0.804838
	hsa-mir-449a	6.75154	-1.8625	-0.263034	-0.125531	-1.99735	1.68723	2.99657	-0.469745	-0.194283	0.442262
	hsa-mir-450a-2	-0.347923	-0.977974	1	-1.40718	-1.70657	-0.0420653	0.634283	1.10314	-0.194994	0.586873
	hsa-let-7a-2	0.389042	0.347307	0.600792	-0.333374	-1.51536	-0.0680286	-0.504498	-0.505994	-0.200701	0.435833
	hsa-mir-196a-2	0.607954	1.94486	-1.95477	-2.05849	3.46047	2.63643	-2.44746	-1.01147	-0.201759	0.863206
	hsa-mir-1276	1.11548	-2.66985	0	-2.11548	0.00265445	-0.405877	1.47844	-0.721284	-0.202939	0.439786
	hsa-mir-22	-1.26757	0.458635	0.154694	0.794344	0.373914	-1.74963	-1.84413	-0.564661	-0.204983	0.259857
	hsa-mir-3129	-0.777608	0.722466	0.347923	-0.758992	1.24144	-0.853336	-0.77895	1.43072	-0.205534	0.841734
	hsa-mir-541	NA	NA	NA	-1.078	0.630686	-1.77934	-0.206061	1.82304	-0.206061	0.856665
	hsa-mir-641	-0.347923	-0.14003	0.111031	-0.280108	-0.829223	0.0306932	1.0634	-1.22062	-0.210069	0.427984
	hsa-mir-1255a	-0.293731	5.34696	-0.325576	-0.608232	0.776651	-0.136582	0.0569738	-1.99421	-0.215156	0.658608
	hsa-mir-337	-2	1.1375	-1.58496	-0.862496	0.428919	-2.18349	2.12521	0.632353	-0.216789	0.624292
	hsa-mir-363	0.621488	1.64198	-0.109122	-0.325638	1.01479	-0.667314	-2.58913	-0.996206	-0.21738	0.716222
	hsa-mir-1304	2	NA	-1.58496	-0.315502	-0.226827	0.79874	0.478438	-0.549916	-0.226827	0.848737
	hsa-mir-323	0	-1.01777	0.157541	-1.556	-0.466189	-1.12525	1.1921	0.963214	-0.233095	0.53016
	hsa-mir-887	0.0524674	0.847997	-0.152003	-1.41504	1.35561	-2.81622	-2.73588	-0.320746	-0.236375	0.274691
	hsa-mir-502	-1.3073	0.0850361	0.24972	0.55507	0.462577	-0.588348	-2.07593	-0.831644	-0.251656	0.234563
	hsa-mir-152	1.71705	0.638858	0.0667855	-1.009	-1.0109	-0.0923171	-0.419524	-0.857061	-0.25592	0.727429
	hsa-mir-301a	-0.0181473	-0.984487	-0.0824622	-1.34365	0.642323	-0.435531	0.261562	-1.10738	-0.258996	0.16905
	hsa-mir-27b	1.78983	-1.7398	0.0686161	-0.701605	0.631918	-0.590864	0.924619	-1.56964	-0.261124	0.743311
	hsa-mir-210	-0.321661	0.359896	0.067993	0.798752	-0.213323	-0.528154	-1.33208	-1.85214	-0.267492	0.257892
	hsa-mir-181a-2	-0.676513	-1.99863	1.86748	2.31527	-0.584346	0.517359	0.036708	-1.246	-0.273819	0.957647
	hsa-mir-412	-0.415037	-0.862496	NA	-0.736966	2.70309	0.331088	-0.27645	0.908766	-0.27645	0.63543
	hsa-mir-519d	NA	NA	NA	NA	NA	NA	-0.27645	NA	-0.27645	NA
	hsa-mir-3174	-0.192645	1.94486	-0.415037	-1	0.172579	0.452767	-1.35445	-0.36283	-0.277738	0.798969
	hsa-mir-490	NA	0.137504	NA	NA	-0.694783	NA	NA	NA	-0.27864	0.624385
	hsa-mir-188	-1.96625	-0.37707	0.131245	-0.335836	1.5534	-0.103608	-1.93144	-0.23017	-0.283003	0.34371
	hsa-mir-548j	0.536053	0.459432	-2.62449	-0.405992	-0.615916	-0.183485	-0.644182	1.64573	-0.294739	0.615846
	hsa-mir-1179	NA	NA	-1	-0.485427	-0.89781	0.916051	-0.106525	0.238074	-0.295976	0.487704
	hsa-mir-455	0.513771	-0.372981	-0.147467	-0.589025	-1.91152	-1.2018	0.263201	-0.22074	-0.296861	0.142408
	hsa-mir-628	-0.389947	1.1375	1.58496	-0.341037	-0.0528407	-0.361483	-0.61672	-0.257337	-0.299187	0.76785
	hsa-mir-371	NA	0.137504	-0.321928	-0.800131	0.475142	2.15979	-1.7236	-0.306246	-0.306246	0.909063
	hsa-mir-720	NA	NA	NA	NA	-0.997346	NA	-0.0134155	-0.306246	-0.306246	0.271247
	hsa-mir-3146	NA	-0.862496	NA	-3.70044	0.324583	0.331088	NA	-0.306246	-0.306246	0.323018
	hsa-mir-186	-0.598892	1.48861	-0.621022	1.39528	-0.747964	1.1767	-0.0344583	-1.03871	-0.316675	0.742785
	hsa-mir-2278	-2	0.137504	-1	-0.485427	-0.149349	0.816515	-1.86141	0.600644	-0.317388	0.229044
	hsa-mir-548e	0.259867	-0.612518	-0.245112	1.43812	-0.694154	0.437113	-0.39068	-0.66012	-0.317896	0.829021
	hsa-mir-3149	-0.415037	NA	NA	-0.321928	NA	-0.142843	0.478438	-1.98432	-0.321928	0.306845
	hsa-mir-421	-0.648214	-1.17639	-0.649093	0.484643	-0.224931	-0.194725	0.231034	-0.448265	-0.336598	0.121265
	hsa-mir-556	-0.222392	-1.8625	0	0.29956	0.200594	-3.29569	-3.15092	-0.453804	-0.338098	0.0847767
	hsa-mir-520f	NA	NA	NA	NA	NA	-1.99084	1.30851	NA	-0.341164	0.870173
	hsa-mir-196b	0.657894	1.12114	-4.44956	-5.94781	4.92819	-0.33978	-2.72949	-0.363402	-0.351591	0.487078
	hsa-mir-33b	-0.765199	-0.117754	-0.173648	-0.511611	-0.209852	-0.475199	-1.57119	-0.23349	-0.354344	0.0206066
	hsa-mir-487a	-2.22239	0.137504	-1.26303	-0.765535	0.884599	-1.53141	0.0354941	0.518182	-0.36502	0.214865
	hsa-mir-191	-0.383294	0.68271	0.242409	-1.51038	-0.869787	0.00457863	-0.365036	-0.470917	-0.374165	0.203722
	hsa-mir-135b	1.24027	-3.22455	-1.32833	2.21487	2.82562	-2.14118	0.363663	-1.11298	-0.374656	0.853852
	hsa-mir-140	2.06484	-0.730225	0.705395	-0.645258	-1.0003	1.63073	-0.375076	-0.376323	-0.375699	0.709831
	hsa-let-7f-2	0.863057	0.156491	0.792987	0.254075	-1.96826	-0.909406	-1.31091	-1.14862	-0.376458	0.311429
	hsa-mir-29c	-0.450484	0.00841458	1.00273	-0.313823	-1.66872	0.25943	-1.96554	-1.14438	-0.382153	0.176008
	hsa-mir-378	-0.197446	0.896495	-0.321928	-0.233797	-0.719812	-2.71876	-3.51592	-0.44375	-0.382839	0.122037
	hsa-mir-320b-2	-0.929611	0.533432	1.18057	-0.357552	-0.98299	2.05306	-0.629608	-0.417668	-0.38761	0.888688
	hsa-mir-127	1.37409	-1.58607	-0.83428	-0.532383	-1.1259	0.866803	-0.25144	2.16989	-0.391911	0.983341
	hsa-mir-206	2.08746	NA	-2	-0.906891	4.46209	0.896685	-0.391927	-0.657301	-0.391927	0.568752
	hsa-mir-29a	-0.13555	-1.59712	0.128199	-0.985762	-0.66067	1.41829	-1.0211	0.158034	-0.39811	0.343635
	hsa-mir-136	-2.36757	0.174029	-0.408806	-0.394919	-0.400238	-1.06457	-1.34811	0.8949	-0.404522	0.122395
	hsa-mir-2116	-1	NA	-0.584963	2	1.32458	-0.405877	1.63044	-2.98432	-0.405877	0.996711
	hsa-mir-573	NA	NA	-2.58496	-0.584963	NA	-0.405877	0.308513	0.0156816	-0.405877	0.270022
	hsa-mir-3173	NA	0.137504	-2	-0.514573	-0.412383	1.33109	0.571547	-3.79167	-0.412383	0.344209
	hsa-mir-330	3.03342	-0.732274	-0.731895	-1.20788	-0.193569	-0.656762	0.399467	-0.197312	-0.427037	0.941378
	hsa-mir-504	2.90689	-4.22928	-0.321928	1.16993	-1.91656	0.567993	-0.532498	-2.45343	-0.427213	0.47319
	hsa-mir-107	1.88843	-3.6194	-0.383089	-0.475566	-1.16271	0.0576913	0.849425	-0.591942	-0.429328	0.473168
	hsa-mir-431	-0.415037	-0.447459	-1	-0.947533	3.32458	-0.853336	1.08612	3.33761	-0.431248	0.463491
	hsa-mir-935	-2.41504	-0.862496	0	1.10309	-1.48277	0.672125	0.115867	-1.88081	-0.431248	0.22546
	hsa-mir-1294	-0.584963	-0.447459	-1.89616	-1	2.81001	2.00916	0.460516	-0.424891	-0.436175	0.841179
	hsa-mir-147b	-0.476781	2.63227	1.48543	-0.407658	1.17258	-2.19729	-5.3062	-1.11143	-0.442219	0.566743
	hsa-mir-192	0.902395	0.0242268	0.439254	-0.629499	-0.270142	-1.41448	-1.07733	-1.77858	-0.449821	0.189374
	hsa-mir-508	-1.30485	0.137504	0	NA	2.46209	-0.454787	-5.53698	-3.79167	-0.454787	0.274556
	hsa-mir-411	-0.466568	-0.461134	-0.807355	0.235778	-0.552782	-0.964246	-0.41138	0.868386	-0.463851	0.172088
	hsa-mir-605	0	1.45943	NA	-1.5025	-0.466831	-2.36935	0.115867	-1.79167	-0.466831	0.240417
	hsa-mir-101-1	-1.10309	-0.0740006	1	2.85244	-0.535765	-0.405877	-0.809669	-1.60776	-0.470821	0.86908
	hsa-mir-632	0	NA	0.584963	-0.169925	-0.774953	NA	-1.01342	-1.56928	-0.472439	0.182715
	hsa-mir-516b-2	NA	NA	NA	NA	NA	-1.99084	1.04548	NA	-0.472681	0.807844
	hsa-mir-1278	-0.263034	-1.79661	-0.584963	-1.41163	0.0393662	-0.426939	0.263283	-0.52768	-0.47731	0.0480919
	hsa-mir-134	-0.325095	-0.242769	-0.969194	-0.90182	1.10311	-0.979699	-0.629648	3.06008	-0.477372	0.977756
	hsa-mir-200c	-0.176312	0.264999	0.204082	-0.899014	2.35009	-0.785626	-0.911008	-3.17799	-0.480969	0.497993
	hsa-mir-20b	-1.44057	-0.540568	0.0443941	-0.440573	0.382503	-0.870042	-3.0838	-0.115563	-0.49057	0.0910855
	hsa-mir-320e	0	NA	NA	0	-0.997346	0.00916	-1.01342	-0.984318	-0.492159	0.0769271
	hsa-mir-106b	-0.691385	-2.96947	-0.240359	-1.04914	-0.113378	-0.518895	0.769774	-0.467542	-0.493219	0.125486
	hsa-mir-510	NA	NA	NA	NA	0.00265445	-0.99084	NA	NA	-0.494093	0.501705
	hsa-mir-545	NA	NA	NA	NA	0.00265445	-0.99084	NA	NA	-0.494093	0.501705
	hsa-mir-3148	NA	NA	NA	0	NA	-0.99084	NA	NA	-0.49542	0.5
	hsa-mir-3163	NA	NA	NA	0	-0.997346	-0.99084	NA	2.33761	-0.49542	0.918506
	hsa-mir-3199-1	NA	NA	NA	2	-2.99735	NA	NA	NA	-0.498673	0.874594
	hsa-mir-199a-1	-1	NA	1	1.80735	-1.18999	-0.505413	-1.69149	3.18561	-0.505413	0.748277
	hsa-mir-548s	-2.22239	-0.862496	NA	0.222392	1.32458	-0.505413	-2.27645	0.430719	-0.505413	0.318308
	hsa-mir-216a	-1	NA	NA	-0.514573	NA	2.00916	0.308513	-0.569281	-0.514573	0.934464
	hsa-mir-655	-2.52838	-0.514573	NA	-0.974909	0.968707	-2.71073	0.106879	3.10314	-0.514573	0.650976
	hsa-mir-19b-1	-1.91511	NA	NA	-0.398549	-0.112823	-2.12834	1.30851	-0.636395	-0.517472	0.264874
	hsa-mir-429	0.715109	-1.43251	0.518434	0.396279	2.65584	-1.46171	-2.09235	-2.93701	-0.518115	0.505612
	hsa-mir-570	-0.874469	NA	NA	1.32193	-0.634775	-0.405877	-2.86141	1.18561	-0.520326	0.573064
	hsa-mir-323b	NA	-1.05514	-0.36257	-0.600393	-0.444805	-0.768448	1.12044	NA	-0.522599	0.309623
	hsa-mir-592	-1.41504	-0.540568	1	-1.48981	2.17258	-0.505413	-4.49884	3.408	-0.522991	0.794889
	hsa-mir-23b	0.194663	-0.465682	-0.287361	-0.587227	-0.279238	-2.29396	-0.660764	-3.36434	-0.526454	0.0584111
	hsa-mir-3202-1	-3	1.3599	NA	-0.584963	-4.58231	2.29867	-0.539484	0.643713	-0.539484	0.518743
	hsa-mir-93	-0.00202374	-2.16984	-0.689904	-0.993732	0.156066	-0.751652	0.643366	-0.389888	-0.539896	0.126413
	hsa-mir-597	-1	NA	NA	0.29956	0.587617	-0.116371	-3.01342	-2.30625	-0.558185	0.182453
	hsa-mir-1185-1	-1.41504	-0.21042	-0.906891	-1.16729	0.297275	-2.18691	0.160414	0.134326	-0.558655	0.0755275
	hsa-mir-4309	NA	NA	-0.584963	NA	NA	-1.66891	-0.539484	3.01568	-0.562223	0.959995
	hsa-mir-551b	-2	-1.44746	NA	-1.87447	-0.566711	0.00916	4.64241	0.0156816	-0.566711	0.846428
	hsa-mir-1181	NA	NA	NA	NA	NA	0.594123	-0.691487	-0.569281	-0.569281	0.641901
	hsa-mir-452	-0.979221	0.0687465	-0.601981	-0.880175	1.59175	-0.538751	-0.363555	-1.55401	-0.570366	0.258764
	hsa-mir-2115	NA	NA	-2.32193	1.16993	2.90955	NA	-2.86141	NA	-0.576002	0.855082
	hsa-mir-548t	-1	-0.540568	0.893085	-0.621488	2.00265	-0.338763	-1.04512	-2.92292	-0.581028	0.411353
	hsa-mir-378c	-1.16665	2.1375	0	0.485427	-2.05179	-3.31277	-3.39193	0.0156816	-0.583325	0.225007
	hsa-mir-18b	-2.34104	-1.18442	NA	-0.584963	-0.319274	-0.450272	-0.498842	-0.984318	-0.584963	0.014109
	hsa-mir-656	-1.44746	NA	-0.584963	-1.11548	0.278289	-2.5758	-0.553984	1.71612	-0.584963	0.277426
	hsa-mir-487b	-1.01097	0.417611	-1.75132	-0.818243	-0.332415	-1.07222	-0.390183	0.816648	-0.604213	0.122601
	hsa-mir-362	-1.61813	0.855104	-0.366428	-0.506725	0.517965	-0.828198	-2.67555	-0.719691	-0.613208	0.136069
	hsa-mir-32	-0.784444	-1.18442	-0.316027	-0.906315	-1.16453	0.2966	-0.331386	-0.462254	-0.623349	0.0111602
	hsa-mir-3145	-0.777608	NA	-1.58496	-1	0.587617	-0.62827	1.51496	0.0156816	-0.62827	0.526464
	hsa-mir-624	0.378512	-1.18442	0	-0.830075	-1.04174	-0.825781	0.378902	-0.44375	-0.634765	0.0840661
	hsa-mir-17	-0.692264	-2.05648	-0.940816	-0.44443	-0.179354	-1.16229	0.215318	-0.58901	-0.640637	0.0194877
	hsa-mir-1827	-0.245112	NA	-0.643856	-0.644625	2.2989	-3.29462	-1.46137	-1.95043	-0.644625	0.241596
	hsa-mir-652	0.474362	-0.588931	0.102051	1.40127	-0.927788	-0.710549	-1.08015	-1.93661	-0.64974	0.301247
	hsa-mir-559	-0.736966	NA	NA	-0.736966	0.00265445	-0.505413	-0.91388	-0.569281	-0.653123	0.00676015
	hsa-mir-30c-1	0.222392	-1.33643	0.559427	-0.70044	-1.99735	1.68159	-0.691487	-0.621748	-0.656618	0.405261
	hsa-mir-29b-2	-2.36568	-0.684854	-0.804604	0.967383	-0.353793	-0.65153	-1.33832	1.34876	-0.668192	0.286806
	hsa-mir-187	NA	-3.32193	NA	0	-2.52091	-1.33876	3.08987	2.60064	-0.669382	0.827443
	hsa-mir-324	0.984835	-0.862496	0.253757	-1.48334	-0.951542	-1.27055	0.104717	-0.517051	-0.689774	0.162464
	hsa-mir-15a	0.147085	0.738277	-1.14389	-0.541146	-0.277414	-0.848773	-1.10359	-0.838625	-0.689886	0.0757113
	hsa-mir-625	-2	NA	0	0.192645	-0.997346	-0.253874	-0.691487	-0.984318	-0.691487	0.0534459
	hsa-mir-218-1	0.280108	NA	NA	0.847997	-2.58231	-1.02646	-1.56596	-0.36283	-0.694647	0.210622
	hsa-mir-193a	-2.42572	-0.766527	0.0628008	0.901501	-0.594256	-0.624729	-2.22062	-1.16947	-0.695628	0.0641804
	hsa-mir-138-1	-3	2.45943	-1.39232	0.847997	-0.286852	1.36565	-1.10652	-1.16266	-0.696689	0.660745
	hsa-mir-1197	-1	1.72247	-1	1	-0.412383	-1.31277	1.30851	-0.984318	-0.698351	0.850168
	hsa-mir-425	-0.758537	0.264101	-0.908091	0.694447	0.249747	-2.308	-0.638918	-1.90545	-0.698727	0.119597
	hsa-mir-3117	-1.0614	-1.54057	0.667425	-0.336283	0.96518	-3.53082	-1.54947	0.951551	-0.698842	0.258314
	hsa-mir-1296	0.89812	-3.40682	-1	1.79141	-1.93595	-1.21323	1.63044	-0.431777	-0.715889	0.497574
	hsa-mir-1-1	-0.293731	3.99548	0.847997	-2.2303	5.79056	-5.80846	-1.14787	-2.64253	-0.720798	0.891552
	hsa-mir-1245	-1.152	-0.862496	-3.45943	-0.584963	0.621564	-1.5758	-0.215049	3.51818	-0.723729	0.532553
	hsa-mir-130b	-0.29384	-1.40949	-1.93313	-1.31792	0.720439	-0.707346	0.462173	-0.748896	-0.728121	0.0844643
	hsa-mir-16-1	-0.271128	0.281893	-2.20645	0.263034	-1.75704	-0.222382	-1.18951	-1.47027	-0.730321	0.0454879
	hsa-mir-1201	-3.58496	NA	NA	4.08746	-0.734311	NA	-3.86141	1.60064	-0.734311	0.759682
	hsa-mir-3152	NA	NA	NA	-0.736966	NA	NA	NA	NA	-0.736966	NA
	hsa-mir-194-2	-0.294845	-0.57622	-2.05029	-0.900367	2.54788	-1.71418	-1.90505	-0.370795	-0.738294	0.246577
	hsa-mir-376c	-2.79133	1.37851	-1.32193	-0.505374	-0.0458894	-1.83737	-0.98295	1.3636	-0.744162	0.290938
	hsa-mir-513c	0	NA	NA	NA	NA	-0.405877	-4.33534	-1.13632	-0.771099	0.232137
	hsa-mir-451	2.61155	1.88863	-1.83288	0.309893	-1.42563	-0.747611	-2.27645	-0.811935	-0.779773	0.659777
	hsa-mir-889	-0.914902	-1.18685	-0.736966	-0.826483	1.46443	-3.00997	0.54977	4.34415	-0.781724	0.960793
	hsa-mir-299	-1.15267	-1.34792	-1.66297	-0.350057	0.403089	-3.13859	-0.435649	0.176146	-0.794161	0.0539397
	hsa-mir-195	-0.731632	2.47059	0.681178	-2.68255	-2.0289	0.224111	-1.80961	-0.876788	-0.80421	0.349617
	hsa-mir-513b	NA	NA	NA	NA	NA	-0.99084	NA	-0.636395	-0.813618	0.136536
	hsa-mir-665	-2.42884	-0.862496	-1.22239	-0.765535	0.937559	-1.77934	1.30851	1.13116	-0.814016	0.389068
	hsa-mir-450a-1	-1.58496	NA	NA	-0.169925	-1.42619	-1.31277	-0.33785	1.47511	-0.825309	0.29005
	hsa-mir-544b	-3	NA	-1	-0.678072	1.13194	NA	NA	NA	-0.839036	0.371871
	hsa-mir-410	-1.69862	-1.51457	-1.24101	-0.451379	0.2144	-2.60728	0.884197	-0.453804	-0.847406	0.0677536
	hsa-mir-219-1	0.295456	-1.76939	0.473931	-0.396659	-1.30769	0.468592	-1.46408	-2.06524	-0.852172	0.0945163
	hsa-mir-135a-2	NA	-0.862496	NA	NA	2.58762	-2.66891	8.37729	-2.56928	-0.862496	0.664481
	hsa-mir-383	NA	NA	NA	1.58496	-2.66031	-4.06123	NA	0.908766	-0.875772	0.495883
	hsa-mir-377	-3.18057	2.52982	-0.847997	-0.922832	0.40547	-3.29979	-1.11891	0.501108	-0.885415	0.314485
	hsa-mir-599	NA	NA	NA	-0.906891	-2.36658	1.49459	10.6948	-0.953945	-0.906891	0.536612
	hsa-mir-217	-1.10692	-2.44746	-0.736966	-1.41883	-0.301126	0.855126	-3.16097	-0.610504	-0.92194	0.0398977
	hsa-mir-876	-3.58496	-0.862496	NA	NA	NA	-0.99084	1.89348	NA	-0.926668	0.486167
	hsa-mir-561	-2.58496	NA	-0.932886	3	1.17258	-1.79819	-0.27645	-0.984318	-0.932886	0.647293
	hsa-let-7d	-0.706078	0.448112	0.683358	-1.69351	-1.25929	0.825456	-2.02231	-1.33067	-0.982686	0.158351
	hsa-mir-138-2	-2.58496	1.72247	NA	1	-2.58231	0.746126	-2.27645	-0.984318	-0.984318	0.34979
	hsa-mir-1243	NA	NA	NA	NA	NA	-0.99084	NA	NA	-0.99084	NA
	hsa-mir-1909	NA	NA	NA	NA	NA	-0.99084	NA	NA	-0.99084	NA
	hsa-mir-3164	NA	NA	NA	NA	NA	-0.99084	NA	NA	-0.99084	NA
	hsa-mir-3189	NA	NA	NA	NA	NA	-0.99084	NA	NA	-0.99084	NA
	hsa-mir-4289	NA	NA	NA	NA	NA	-0.99084	NA	NA	-0.99084	NA
	hsa-mir-1285-1	NA	NA	-1	-1	-1.99735	1.00916	0.308513	-0.984318	-0.992159	0.224741
	hsa-mir-3178	NA	NA	NA	-1	NA	2.46859	-2.01342	-0.984318	-0.992159	0.722601
	hsa-mir-147	-1	NA	NA	NA	NA	NA	NA	NA	-1	NA
	hsa-mir-422a	-1	NA	0.807355	-1.87447	3.32458	NA	NA	-4.07178	-1	0.675654
	hsa-mir-614	-1	NA	NA	NA	NA	NA	NA	NA	-1	NA
	hsa-mir-208b	-1	NA	NA	NA	NA	NA	NA	NA	-1	NA
	hsa-mir-320d-1	-1	NA	NA	NA	NA	NA	NA	NA	-1	NA
	hsa-mir-939	NA	NA	NA	-1	NA	NA	0.308513	-2.56928	-1	0.321397
	hsa-mir-1257	NA	NA	NA	-1	NA	NA	NA	NA	-1	NA
	hsa-mir-3175	NA	-1.44746	NA	-1	-2.58231	3.33109	NA	0.0156816	-1	0.755046
	hsa-mir-106a	-1.93289	-0.862496	0.222392	-1.15528	0.791975	-1.46618	-1.49884	0.0156816	-1.00889	0.0686217
	hsa-mir-144	2.63443	0.0846516	-1.21459	-1.58018	-0.80913	-0.429632	-2.82207	-1.86267	-1.01186	0.235442
	hsa-mir-18a	-1.73081	-2.94996	-2.26679	-0.365439	0.368479	-1.69203	0.879261	0.613244	-1.02874	0.125278
	hsa-mir-10b	-3.20902	-5.04448	0.566103	0.040642	3.06659	-2.13062	0.308513	-4.05627	-1.04499	0.22049
	hsa-mir-219-2	-1.48543	-3.03242	-1.32193	-0.415037	1.09012	-0.784389	1.64955	-1.92292	-1.05316	0.19742
	hsa-mir-577	-0.456557	-0.816104	-1.8413	-1.58496	4.32181	-0.957673	-3.61858	-1.175	-1.06634	0.372134
	hsa-mir-20a	-1.30376	-1.68142	-1.57627	-0.532954	-0.584545	-0.968187	0.372528	-1.18045	-1.07432	0.00572605
	hsa-mir-3143	-1.89308	-3.18442	-1	-0.452512	1.22505	-1.17725	-2.39193	1.33761	-1.08863	0.14266
	hsa-mir-524	NA	NA	NA	NA	NA	-1.99084	-0.27645	NA	-1.13364	0.41216
	hsa-mir-1914	NA	NA	NA	NA	NA	-2.5758	0.308513	NA	-1.13364	0.575889
	hsa-mir-600	0	NA	NA	0.807355	-2.41238	1.4242	-2.27645	-3.30625	-1.13822	0.28226
	hsa-mir-494	-1.39855	-1.27753	-1.55459	-1.4549	1.39426	-1.01262	0.113567	2.59462	-1.14508	0.574362
	hsa-mir-514b	NA	NA	NA	NA	0.00265445	NA	NA	-2.30625	-1.1518	0.500733
	hsa-mir-153-2	NA	NA	NA	-1.32193	NA	-0.99084	2.72355	-1.98432	-1.15638	0.735045
	hsa-mir-130a	-1.52265	1.24628	1.10336	-1.55094	-1.79351	-0.901676	-1.862	0.384522	-1.21216	0.230114
	hsa-mir-141	-1.12056	-1.34489	1.32035	-0.858357	1.93727	-2.20695	-1.49992	-3.43568	-1.23273	0.191236
	hsa-mir-145	-1.90788	0.94332	-0.567165	-0.377825	2.23387	-5.09854	-3.47133	-2.7295	-1.23752	0.150408
	hsa-mir-4286	3.80735	NA	-1.58496	1.80735	-1.23835	-1.47627	1.04548	-1.56928	-1.23835	0.893375
	hsa-mir-31	-1.73883	-4.74435	2.50691	-1.86273	1.03385	-0.792928	-0.0213827	-4.09839	-1.26588	0.203372
	hsa-mir-574	2.01381	-3.97716	-0.337342	0.667948	-2.21686	-0.126886	-2.8249	-2.70189	-1.2771	0.144859
	hsa-mir-205	NA	NA	NA	NA	-0.997346	NA	NA	-1.56928	-1.28331	0.139581
	hsa-mir-3155	NA	NA	NA	-2.58496	NA	0.00916	NA	NA	-1.2879	0.502256
	hsa-mir-190	-2.32193	3.45943	-0.736966	1.16993	0.265689	-2.09038	-2.86141	-1.89121	-1.31409	0.437355
	hsa-mir-675	1.16993	-9.04737	NA	-2.32891	-4.73759	-0.312768	1.98658	NA	-1.32084	0.24781
	hsa-mir-3181	NA	0.722466	NA	NA	-1.99735	NA	-1.69149	-0.984318	-1.3379	0.202873
	hsa-mir-3139	NA	0.137504	NA	-1	-1.99735	0.00916	-1.69149	-2.30625	-1.34574	0.042915
	hsa-mir-372	NA	NA	-2	-1.41954	0.959586	1.36425	-1.28957	-1.56928	-1.35455	0.312084
	hsa-mir-378b	-1.38187	NA	-0.0740006	0.459432	2.17258	-1.68881	-3.68546	-1.46784	-1.38187	0.294355
	hsa-mir-1-2	-1.13245	3.11852	-1.16273	-2.25659	4.49984	-4.3065	-1.61298	-1.92948	-1.38785	0.580788
	hsa-mir-1269	-1.41504	-7.65882	1.51385	NA	-6.19374	NA	2.26959	NA	-1.41504	0.315036
	hsa-mir-552	-0.511253	-4.43649	-4.87213	2.44771	4.56016	-1.22217	-1.72557	-2.00248	-1.47387	0.418686
	hsa-mir-548v	NA	-2.03242	1	1.16993	-1.48277	-0.784389	-2.69149	-2.05471	-1.48277	0.14008
	hsa-mir-194-1	-0.662499	-3.4817	-1.37197	-2.12776	5.50515	-2.11264	-1.61006	0.119705	-1.49101	0.481555
	hsa-mir-1308	-1	NA	NA	NA	NA	-3.33876	-1.98427	2.33761	-1.49213	0.470721
	hsa-mir-135a-1	NA	NA	NA	-1.58496	-3.58231	4.76405	4.70083	-4.56928	-1.58496	0.979754
	hsa-mir-1266	-1.87447	-1.44746	-0.584963	0.485427	-2.58231	-2.79819	-1.01342	-2.56928	-1.66096	0.00644275
	hsa-mir-1228	NA	NA	NA	NA	-2.58231	NA	-0.91388	NA	-1.74809	0.283457
	hsa-mir-133b	NA	NA	NA	0	NA	-3.79819	NA	NA	-1.8991	0.5
	hsa-mir-4317	NA	NA	NA	NA	NA	-1.99084	NA	NA	-1.99084	NA
	hsa-mir-215	1.54674	-2.79202	-0.461786	-3.71486	4.83691	-2.68071	-3.29848	-1.4284	-2.05456	0.365536
	hsa-mir-520a	NA	NA	NA	0	NA	-2.31277	-2.69149	NA	-2.31277	0.185832
	hsa-mir-1911	NA	-3.18442	NA	NA	NA	NA	NA	NA	-3.18442	NA
	hsa-mir-506	NA	NA	NA	NA	NA	1.00916	-3.49884	-3.30625	-3.30625	0.319653
	hsa-mir-448	NA	NA	-2.16993	NA	NA	NA	-7.1427	NA	-4.65631	0.312238
	hsa-mir-1272	NA	NA	-5.2854	NA	NA	NA	NA	NA	-5.2854	NA
